# Supplementary material for: Mobile phone addiction and depressive symptoms among Chinese University students: The mediating role of sleep disturbances and the moderating role of gender
Source: Front Public Health. 2022 Sep 20;10:965135. doi: 10.3389/fpubh.2022.965135 (PMC9531624; doi:10.3389/fpubh.2022.965135)
Supplement: Supplementary file 1 [file Table_1.XLS]

## Sheet: Sheet1
Number	Student ID	Gender	Year of birth	Institution	Grade	Major category	Whether it is a sports student or National Defense student	Height(cm)	Weight (1/2kg)	Household registration	Self-rated health	Nearly 1 month of bed time at night (hours)	Nearly 1 month of bed time at night (min)	How many minutes it takes to go to bed and fall asleep in a month	Wake up time in the last month (hour)	Wake up time in the last month (min)	Actual sleep time (hours) per night in recent 1 month	age	weight(kg)	sle_sq	sle_lat1	sle_lat2	sle_lat	sle_dur	t_go bed	t_get up	h_in bed	sle_ef	sle_eff	sle_dis	sle_med	dat	dat_dys	psqi	dep1	dep2	dep3	dep4	dep5	dep6	dep7	dep8	dep9	dep	mpai	edu
1		female	2002	Xi’an Jiaotong University	Sophomore	Humanities and SocialSciences	No	171	132	Urban	In poor health	0	1	30	7	0	5	19	66	2	1	2	2	2	0.0166667	7	6.98333	0.71599	2	3	0	5	3	14	3	3	3	3	3	0	0	3	3	21	41	3
2	2194120354	female	2001	Xi’an Jiaotong University	Junior	Humanities and SocialSciences	No	161	97	Rural	General health condition	23	0	30	7	30	7	20	48.5	1	1	2	2	1	23	7.5	8.5	0.823529	1	1	0	4	2	8	1	1	1	1	1	1	1	0	0	7	60	1
3	2207115380	male	2002	Xi’an Jiaotong University	Sophomore	Engineering	No	171	155	Urban	In good health	1	0	30	7	0	6	19	77.5	1	1	1	1	2	1	7	6	1	0	2	0	6	3	9	0	0	0	0	0	0	0	0	0	0	48	3
4	2005110893	male	2002	Xi’an Jiaotong University	Sophomore	Engineering	No	175	120	Rural	In good health	0	0	15	7	0	7	19	60	1	0	1	1	1	0	7	7	1	0	0	0	4	2	5	1	0	0	1	0	0	1	0	0	3	23	1
5	2215110353	male	2003	Xi’an Jiaotong University	Freshman	Medicine	No	175	130	Rural	In very good health	0	0	30	7	0	6	18	65	1	1	3	2	2	0	7	7	0.857143	0	2	0	3	2	9	0	1	0	0	0	1	2	0	0	4	60	1
6	221320620	female	2002	Xi’an Jiaotong University	Sophomore	Humanities and SocialSciences	No	174	160	Urban	General health condition	0	0	10	7	0	6	19	80	0	0	0	0	2	0	7	7	0.857143	0	1	0	6	3	6	1	1	0	1	3	2	0	0	1	9	46	1
7	2216114023	male	2002	Xi’an Jiaotong University	Freshman	Medicine	No	178	170	Urban	In good health	23	0	15	7	0	8	19	85	1	0	1	1	0	23	7	8	1	0	1	0	0	0	3	0	1	0	0	0	0	0	0	0	1	30	3
8	2212222981	female	2002	Xi’an Jiaotong University	Freshman	Humanities and SocialSciences	No	169	138	Urban	General health condition	23	0	20	6	30	7	19	69	1	1	1	1	1	23	6.5	7.5	0.933333	0	1	0	0	0	4	0	1	1	1	1	1	0	0	0	5	35	2
9	2113121665	male	2001	Xi’an Jiaotong University	Freshman	Engineering	No	180	120	Urban	General health condition	0	0	5	6	0	6	20	60	3	0	0	0	2	0	6	6	1	0	0	0	5	3	8	1	1	1	2	2	2	2	2	0	13	65	2
10	2213722466	female	2003	Xi’an Jiaotong University	Freshman	Humanities and SocialSciences	No	173	121	Urban	In good health	0	0	30	6	30	5	18	60.5	2	1	3	2	2	0	6.5	6.5	0.769231	1	1	0	6	3	11	1	1	1	3	2	2	2	2	2	16	31	3
11	2216110068	male	2002	Xi’an Jiaotong University	Freshman	Science	No	177	144	Urban	In very good health	0	0	10	7	0	7	19	72	1	0	1	1	1	0	7	7	1	0	1	0	0	0	4	0	0	1	0	1	0	0	0	0	2	22	3
12	2212212398	male	2003	Xi’an Jiaotong University	Freshman	Science	No	186	180	Urban	In good health	23	0	20	7	0	6	18	90	1	1	1	1	2	23	7	8	0.75	1	2	0	1	1	8	1	1	0	1	0	3	1	0	2	9	53	2
13	2216221143	female	2003	Xi’an Jiaotong University	Freshman	Medicine	No	168	120	Urban	In good health	0	0	20	8	0	8	18	60	1	1	1	1	0	0	8	8	1	0	1	0	0	0	3	1	0	1	0	0	0	0	0	0	2	19	1
14	2203712779	male	2002	Xi’an Jiaotong University	Sophomore	Engineering	No	175	143	Urban	In good health	0	0	15	7	15	7	19	71.5	1	0	0	0	1	0	7.25	7.25	0.965517	0	0	0	0	0	2	1	0	0	0	0	0	0	0	0	1	33	1
15		male	2001	Xi’an Jiaotong University	Junior	Humanities and SocialSciences	No	174	111	Urban	In good health	23	30	20	8	40	9	20	55.5	0	1	0	1	0	23.5	8.66667	9.16667	0.981818	0	0	0	2	1	2	1	0	0	1	1	0	0	0	0	3	19	1
16	2206123946	female	2001	Xi’an Jiaotong University	Sophomore	Engineering	No	160	99	Rural	In very good health	22	0	30	9	0	11	20	49.5	2	1	2	2	0	22	9	11	1	0	1	0	0	0	5	1	1	2	0	0	0	1	0	0	5	26	1
17	2204110516	male	2003	Xi’an Jiaotong University	Sophomore	Engineering	No	177	190	Rural	In good health	0	0	30	7	0	6	18	95	3	1	3	2	2	0	7	7	0.857143	0	1	0	5	3	11	1	1	1	1	1	1	1	1	0	8	51	2
18	2203712707	male	2002	Xi’an Jiaotong University	Sophomore	Engineering	No	183	130	Urban	In very good health	0	0	3	7	0	7	19	65	1	0	0	0	1	0	7	7	1	0	1	0	0	0	3	0	0	0	0	0	0	0	0	0	0	20	3
19	2214415456	male	2003	Xi’an Jiaotong University	Freshman	Humanities and SocialSciences	No	182	176	Urban	In good health	23	0	5	6	0	7	18	88	1	0	0	0	1	23	6	7	1	0	0	0	0	0	2	1	3	0	1	0	0	0	0	1	6	60	3
20	2213420133	female	2003	Xi’an Jiaotong University	Freshman	Humanities and SocialSciences	No	155	95	Rural	In good health	23	0	5	6	30	7	18	47.5	2	0	0	0	1	23	6.5	7.5	0.933333	0	1	0	4	2	6	0	0	0	0	1	0	1	0	0	2	34	1
21	2215122695	female	2003	Xi’an Jiaotong University	Freshman	Humanities and SocialSciences	No	165	130	Rural	In poor health	0	0	15	7	0	7	18	65	1	0	0	0	1	0	7	7	1	0	1	0	6	3	6	0	1	1	1	1	0	1	0	0	5	56	3
22	2215012468	male	2003	Xi’an Jiaotong University	Freshman	Engineering	No	173	130	Rural	In very good health	0	0	30	8	0	7	18	65	0	1	0	1	1	0	8	8	0.875	0	0	0	2	1	3	0	0	0	0	0	0	0	0	0	0	17	1
23	2203211431	male	2002	Xi’an Jiaotong University	Sophomore	Engineering	No	170	140	Urban	In very good health	0	0	30	7	0	6	19	70	0	1	0	1	2	0	7	7	0.857143	0	0	0	2	1	4	0	0	0	0	0	0	1	0	0	1	42	2
24	2204421208	female	2002	Xi’an Jiaotong University	Sophomore	Engineering	No	174	114	Urban	In very good health	23	0	20	7	0	7	19	57	0	1	0	1	1	23	7	8	0.875	0	1	0	0	0	3	0	0	0	0	0	0	1	1	0	2	55	2
25		male	2003	Xi’an Jiaotong University	Freshman	Engineering	No	174	150	Urban	In good health	23	0	10	6	30	7	18	75	1	0	0	0	1	23	6.5	7.5	0.933333	0	0	0	0	0	2	0	0	0	0	0	0	0	0	0	0		3
26	3121310014	female	2000	Xi’an Jiaotong University	Master	Humanities and SocialSciences	No	159	136	Urban	In good health	0	0	30	7	0	6.5	21	68	1	1	0	1	1	0	7	7	0.928571	0	1	0	3	2	6	0	1	1	1	1	1	1	1	0	7	43	1
27	3121110030	male	1999	Xi’an Jiaotong University	Master	Humanities and SocialSciences	No	174	140	Rural	General health condition	23	0	60	7	0	7	22	70	2	2	3	3	1	23	7	8	0.875	0	1	0	4	2	9	2	1	1	1	1	1	1	0	0	8	56	1
28	3121310010	female	1987	Xi’an Jiaotong University	Master	Humanities and SocialSciences	No	158	101	Urban	General health condition	23	0	30	6	30	6	34	50.5	2	1	2	2	2	23	6.5	7.5	0.8	1	1	0	2	1	9	0	0	0	1	0	1	1	0	0	3	41	1
29	4521212030		1987	Xi’an Jiaotong University	PhD Candidate	Humanities and SocialSciences	No	158	122	Urban	In very good health	22	0	10	6	0	8	34	61	0	0	2	1	0	22	6	8	1	0	1	0	4	2	4	0	1	1	0	1	0	0	0	0	3	36	1
30	4521212004	female	1976	Xi’an Jiaotong University	PhD Candidate	Humanities and SocialSciences	No	165	130	Urban	General health condition	0	0	30	6	0	5	45	65	1	1	1	1	2	0	6	6	0.833333	1		0	3	2		0	1		1	0	0	0	0	0		32	1
31	1211110041	female	1999	Xi’an Jiaotong University	Master	Humanities and SocialSciences	No	173	106	Urban	General health condition	23	0	30	7	0	7	22	53	1	1	1	1	1	23	7	8	0.875	0	1	0	1	1	5	1	0	0	0	0	0	1	0	0	2	33	3
32	3121110036	male	1997	Xi’an Jiaotong University	Master	Humanities and SocialSciences	No	184	150	Urban	In good health	0	0	30	7	0	6	24	75	0	1	0	1	2	0	7	7	0.857143	0	1	0	4	2	6	1	1	0	1	0	2	1	0	0	6	38	2
33	3121110044	female	1999	Xi’an Jiaotong University	Master	Humanities and SocialSciences	No	175	100	Urban	General health condition	0	0	20	7	0	7	22	50	2	1	2	2	1	0	7	7	1	0	1	0	3	2	8	0	1	1	1	1	0	0	0	0	4	28	3
34		male	1998	Xi’an Jiaotong University	Master	Humanities and SocialSciences	No	173	150	Urban	In good health	0	0	30	8	0	7	23	75	1	1	1	1	1	0	8	8	0.875	0	1	0	2	1	5	0	1	1	0	0	0	0	0	0	2	39	3
35	312310009	female	1998	Xi’an Jiaotong University	Master	Humanities and SocialSciences	No	158	98	Rural	In good health	0	0	10	7	0	6	23	49	2	0	0	0	2	0	7	7	0.857143	0	1	0	5	3	8	1	0	0	1	1	0	1	0	0	4	53	1
36	3121110042		2000	Xi’an Jiaotong University	Master	Humanities and SocialSciences	No	160	98	Urban	General health condition	1	0	10	9	30	8	21	49	1	0	1	1	0	1	9.5	8.5	0.941176	0	1	0	2	1	4	3	3	0	1	1	1	1	0	0	10	52	3
37	3121110043	female	1999	Xi’an Jiaotong University	Master	Humanities and SocialSciences	No	155	97	Rural	In very good health	23	0	10	7	0	7.5	22	48.5	1	0	1	1	0	23	7	8	0.9375	0		0	2	1		0	0	1	0	0	0	0	0	0	1	35	1
38	3121110035	female	1999	Xi’an Jiaotong University	Master	Humanities and SocialSciences	No	160	98	Urban	In good health	23	0	5	7	0	7	22	49	2	0	0	0	1	23	7	8	0.875	0	1	0	2	1	5	1	0	0	1	0	0	1	0	0	3	56	1
39	3121310008	female	1999	Xi’an Jiaotong University	Master	Humanities and SocialSciences	No	152	88	Urban	In good health	23	30	15	7	0	7.1	22	44	0	0	1	1	0	23.5	7	7.5	0.946667	0	1	0	1	1	3	0	0	0	0	0	0	0	0	0	0	44	1
40	3121210004	female		Xi’an Jiaotong University	Master	Humanities and SocialSciences	No	156	114	Urban	In good health	3	0	4	7	0	8		57	1	0	1	1	0	3	7	4	2	0	2	1	3	2	7	0	1	0	2	1	1	2	1	2	10	35	3
41	3121310007	female	1998	Xi’an Jiaotong University	Master	Humanities and SocialSciences	No	181	120	Urban	In very good health	23	0	20	6	30	7	23	60	2	1	2	2	1	23	6.5	7.5	0.933333	0	2	0	4	2	9	1	1	1	0	0	0		0	0		21	1
42	3121110031	female	1998	Xi’an Jiaotong University	Master	Humanities and SocialSciences	No	163	118	Rural	In good health	23	0	30	7	0	7	23	59	2	1	1	1	1	23	7	8	0.875	0	1	0	3	2	7	0	0	1	1	1	1	1	0	0	5	35	1
43	3121310002	female	2000	Xi’an Jiaotong University	Master	Humanities and SocialSciences	No	172	128	Rural	General health condition	23	0	30	7	0	7	21	64	1	1	1	1	1	23	7	8	0.875	0	1	0	3	2	6	0	1	0	1	1	0	1	1	0	5	37	1
44	3121210012	female	1999	Xi’an Jiaotong University	Master	Humanities and SocialSciences	No	164	135	Urban	In good health	0	0	10	8	0	7.5	22	67.5	1	0	1	1	0	0	8	8	0.9375	0	1	0	2	1	4	1	1	1	1	1	1	1	1	0	8	23	1
45		female	1997	Xi’an Jiaotong University	PhD Candidate	Humanities and SocialSciences	No	168	102	Urban	In good health	23	30	10	7	0	7.5	24	51	0	0	1	1	0	23.5	7	7.5	1	0	0	0	2	1	2	0	0	0	1	1	0	1	0	0	3		3
46	3121310001	female	1999	Xi’an Jiaotong University	Master	Humanities and SocialSciences	No	158	104	Rural	In good health	23	0	5	7	0	8	22	52	1	0	0	0	0	23	7	8	1	0	1	0	4	2	4	1	1	0	1	0	0	1	0	0	4	42	1
47	3121332019	female	1999	Xi’an Jiaotong University	Master	Humanities and SocialSciences	No	165	94	Urban	In very good health	0	0	15	7	0	7	22	47	0	0	0	0	1	0	7	7	1	0	0	0	2	1	2	0	1	0	1	0	0	0	0	0	2	27	2
48	3121332045	female	1999	Xi’an Jiaotong University	Master	Humanities and SocialSciences	No	167	97	Urban	General health condition	0	0	30	7	0	6	22	48.5	1	1	1	1	2	0	7	7	0.857143	0	2	3	6	3	12	1	1	1	1	1	1	1	1	1	9	43	1
49	3121132012	male	1998	Xi’an Jiaotong University	Master	Humanities and SocialSciences	No	180	150	Urban	In good health	23	0	5	7	0	8	23	75	1	0	0	0	0	23	7	8	1	0	1	0	4	2	4	0	0	0	1	0	0	0	0	0	1	32	2
50	3121332020	female	1999	Xi’an Jiaotong University	Master	Humanities and SocialSciences	No	161	103	Urban	General health condition	0	0	15	7	0	6.5	22	51.5	1	0	0	0	1	0	7	7	0.928571	0	1	0	0	0	3	0	0	0	1	1	0	0	0	0	2	60	3
51	3121110033	female	1998	Xi’an Jiaotong University	Master	Humanities and SocialSciences	No	168	95	Rural	General health condition	0	0	30	7	0	6	23	47.5	1	1	2	2	2	0	7	7	0.857143	0	2	0	6	3	10	0	0	0	2	1	0	0	0	0	3	48	1
52	3121210003	female	1999	Xi’an Jiaotong University	Master	Humanities and SocialSciences	No	155	90	Rural	In very good health	23	0	20	6	30	7	22	45	1	1	0	1	1	23	6.5	7.5	0.933333	0	0	0	4	2	5	0	0	0	0	0	0	0	0	0	0	17	1
53	3121110033	female	2000	Xi’an Jiaotong University	Master	Humanities and SocialSciences	No	170	110	Rural	General health condition	0	0	60	7	0	6	21	55	2	2	3	3	2	0	7	7	0.857143	0	1	0	6	3	11	2	1	2	2	1	0	1	0	0	9	49	1
54	3121210016	female	1998	Xi’an Jiaotong University	Master	Humanities and SocialSciences	No	150	80	Urban	In very good health	23	0	20	6	0	7	23	40	0	1	1	1	1	23	6	7	1	0	1	0	0	0	3	1	1	0	1	0	0	1	0	0	4	41	1
55	4121110025	female	1999	Xi’an Jiaotong University	PhD Candidate	Humanities and SocialSciences	No	164	120	Urban	In good health	23	0	3	6	30	6.5	22	60	0	0	0	0	1	23	6.5	7.5	0.866667	0	0	0	4	2	3	1	1	0	1	1	0	0	0	1	5	29	2
56	3121110039	male	2000	Xi’an Jiaotong University	Master	Humanities and SocialSciences	No	183	160	Rural	In very good health	23	30	10	8	0	8	21	80	0	0	0	0	0	23.5	8	8.5	0.941176	0	0	0	2	1	1	0	0	0	0	0	0	0	0	0	0	41	1
57	3121110041	male	1999	Xi’an Jiaotong University	Master	Humanities and SocialSciences	No	174	128	Urban	In good health	1	0	40	8	0	6	22	64	2	2	3	3	2	1	8	7	0.857143	0	1	0	4	2	10	0	0	2	1	1	0	1	0	0	5	40	1
58	3121110029	female	1996	Xi’an Jiaotong University	Master	Humanities and SocialSciences	No	162	105	Urban	General health condition	23	0	30	7	0	7	25	52.5	1	1	1	1	1	23	7	8	0.875	0	1	0	2	1	5	0	0	0	0	0	0	1	0	0	1	29	1
59	3121319041	female	1999	Xi’an Jiaotong University	Master	Humanities and SocialSciences	No	168	134	Urban	In good health	23	0	10	7	0	8	22	67	1	0	0	0	0	23	7	8	1	0	1	0	3	2	4	0	0	2	1	1	0	0	0	0	4	34	2
60	3121110028		1999	Xi’an Jiaotong University	Master	Humanities and SocialSciences	No	168	110	Urban	General health condition	22	0	30	6	0	7	22	55	1	1	2	2	1	22	6	8	0.875	0	1	0	4	2	7	1	0	0	1	1	0	0	0	0	3	36	1
61	3121110034	female	1999	Huaihua College	Master	Humanities and SocialSciences	No	165	114	Urban	In very good health	0	0	10	7	0	7	22	57	0	0	0	0	1	0	7	7	1	0	0	0	0	0	1	0	0	0	0	0	0	0	0	0	0	48	1
62		female	2002	Xi’an Jiaotong University	Freshman	Engineering	No	168	120	Rural	In good health	0	0	30	7	0	6.5	19	60	2	1	3	2	1	0	7	7	0.928571	0		0	3	2		0	0	1	1	0	0	1	0	0	3	27	2
63	2201412053	male	2001	Xi’an Jiaotong University	Sophomore	Engineering	No	175	130	Urban	In good health	1	30	10	7	20	6	20	65	0	0	0	0	2	1.5	7.33333	5.83333	1.02857	0	0	0	3	2	4	0	0	0	0	1	1	1	0	0	3	50	3
64	3012020011	male	2002	Xi’an Jiaotong University	Sophomore	Science	No	185	155	Urban	In good health	0	0	10	6	0	6	19	77.5	1	0	0	0	2	0	6	6	1	0	1	0	2	1	5	1	1	0	0	0	0	1	0	0	3	54	1
65	2213722963	female	2003	Xi’an Jiaotong University	Freshman	Engineering	No	168	130	Urban	In good health	0	0	10	7	0	7	18	65	0	0	0	0	1	0	7	7	1	0	0	0	3	2	3	0	0	0	0	0	0	0	0	0	0	54	3
66	2214414270	male	2003	Xi’an Jiaotong University	Freshman	Engineering	No	173	118	Urban	In good health	0	0	60	8	0	7	18	59	2	2	3	3	1	0	8	8	0.875	0	1	0	2	1	8	0	0	0	0	0	0	0	0	0	0	32	3
67	2215112703	male	2002	Xi’an Jiaotong University	Freshman	Humanities and SocialSciences	Yes	196	185	Urban	In very good health	23	0	10	7	0	8	19	92.5	0	0	0	0	0	23	7	8	1	0	0	0	0	0	0	0	0	0	0	0	0	0	0	0	0	21	3
68	2212110274	male	2002	Xi’an Jiaotong University	Freshman	Humanities and SocialSciences	No	185	160	Urban	General health condition	0	0	20	7	0	6.5	19	80	1	1	2	2	1	0	7	7	0.928571	0	1	0	2	1	6	0	0	1	1	0	0	0	1	0	3	31	1
69	2194520935	female	2000	Xi’an Jiaotong University	Junior	Engineering	No	158	104	Urban	General health condition	0	0	30	7	30	6.5	21	52	2	1	3	2	1	0	7.5	7.5	0.866667	0	1	0	6	3	9	3	2	2	2	2	2	1	0	1	15		1
70	2194520957	female	2000	Xi’an Jiaotong University	Junior	Engineering	No	150	84	Rural	General health condition	0	20	10	7	0	6.3	21	42	1	0	0	0	1	0.333333	7	6.66667	0.945	0	1	0	2	1	4	1	1	0	0	0	1	0	0	0	3	28	2
71	2214224830	female	2003	Xi’an Jiaotong University	Freshman	Engineering	No	162	108	Urban	In poor health	0	0	5	8	0	7	18	54	1	0	1	1	1	0	8	8	0.875	0	2	0	4	2	7	1	2	1	1	2	3	1	0	0	11	69	2
72	2213611621	male	2003	Xi’an Jiaotong University	Freshman	Science	No	169	90	Rural	General health condition	0	0	40	9	0	7	18	45	0	2	2	2	1	0	9	9	0.777778	1	1	3	2	1	9	0	1	0	0	0	1	0	0	1	3	40	1
73	2216112334	male	2003	Xi’an Jiaotong University	Freshman	Humanities and SocialSciences	Yes	195	210	Rural	In very good health	0	0	30	7	0	8	18	105	1	1	2	2	0	0	7	7	1.14286	0	0	0	3	2	5	0	0	0	0	0	0	0	0	0	0	45	2
74	2196113369	male	2001	Xi’an Jiaotong University	Junior	Engineering	No	175	135	Urban	In good health	0	0	60	9	0	8	20	67.5	2	2	3	3	0	0	9	9	0.888889	0	2	3	4	2	12	0	0	2	0	1	1	2	1	1	8	41	2
75	2214512295	male	2003	Xi’an Jiaotong University	Freshman	Medicine	No	178	154	Urban	In very good health	23	30	10	7	0	7	18	77	0	0	0	0	1	23.5	7	7.5	0.933333	0	0	0	0	0	1	0	0	1	0	0	1	0	0	0	2	29	1
76		male		Xi’an Jiaotong University	Freshman	Science	No	182	150	Rural	In very good health	0	0	10	7	0	7		75	1	0	1	1	1	0	7	7	1	0	1	0	4	2	6	1	1	0	1	0	1	1	0	0	5	25	1
77	2216123556	female	2002	Xi’an Jiaotong University	Freshman	Engineering	No	167	92	Urban	In good health	0	0	20	6	30	6	19	46	1	1	1	1	2	0	6.5	6.5	0.923077	0	1	0	0	0	5	0	0	0	0	0	0	0	0	0	0	25	3
78	2203322518	female	2001	Xi’an Jiaotong University	Sophomore	Science	No	165	110	Urban	In good health	1	0	2	8	0	7	20	55	0	0	0	0	1	1	8	7	1	0	1	0	3	2	4	1	1	0	1	1	1	0	0	0	5	50	2
79	2215112643		2003	Xi’an Jiaotong University	Freshman	Medicine	No	180	140	Urban	In very good health	23	0	20	7	0	7	18	70	1	1	1	1	1	23	7	8	0.875	0	0	0	2	1	4	1	0	1	2	2	1	3	1	0	11	50	3
80	2211314728	male	2002	Xi’an Jiaotong University	Freshman	Science	No	181	140	Urban	In good health	23	0	5	7	0	8	19	70	1	0	0	0	0	23	7	8	1	0	1	0	0	0	2	0	0	0	0	0	0	0	0	0	0	47	1
81	2211211977	male	2003	Xi’an Jiaotong University	Freshman	Engineering	No	185	134	Urban	In good health	23	0	10	6	0	7	18	67	1	0	0	0	1	23	6	7	1	0	1	0	2	1	4	1	0	1	1	1	0	1	0	0	5	34	3
82	2211420894	female	2003	Xi’an Jiaotong University	Freshman	Science	No	160	90	Urban	In very good health	23	0	5	6	30	7	18	45	1	0	1	1	1	23	6.5	7.5	0.933333	0	1	0	1	1	5	0	0	0	0	0	0	0	0	0	0	22	3
83	2201422016	female	2002	Xi’an Jiaotong University	Sophomore	Engineering	No	160	110		In good health	23	30	30	7	0	7	19	55	1	1	1	1	1	23.5	7	7.5	0.933333	0	1	0	2	1	5	0	0	0	0	0	0	0	0	0	0	49	1
84	221424854	female	2003	Xi’an Jiaotong University	Freshman	Engineering	No	163	120	Urban	General health condition	0	0	30	6	30	6	18	60	2	1	2	2	2	0	6.5	6.5	0.923077	0	1	0	6	3	10	1	1	1	1	0	0	1	0	0	5	52	3
85	2216124096	female	2002	Xi’an Jiaotong University	Freshman	Medicine	No	173	120	Urban	In good health	23	0	5	9	0	10	19	60	0	0	0	0	0	23	9	10	1	0	0	0	1	1	1	0	0	0	1	1	0	0	0	0	2	38	2
86	2215222741	female	2004	Xi’an Jiaotong University	Freshman	Medicine	No	161	106	Urban	In good health	23	0	10	7	0	8	17	53	1	0	1	1	0	23	7	8	1	0	1	0	3	2	5	0	0	0	0	2	1	1	0	0	4	24	3
87	2213712933	male	2003	Xi’an Jiaotong University	Freshman	Engineering	No	190	156	Urban	In poor health	23	0	10	7	0	7	18	78	1	0	0	0	1	23	7	8	0.875	0	1	0	2	1	4	1	1	0	0	0	1	0	0	0	3	31	1
88	2211314740	male	2003	Xi’an Jiaotong University	Freshman	Engineering	No	180	205	Urban	In poor health	0	30	30	6	45	6	18	102.5	1	1	1	1	2	0.5	6.75	6.25	0.96	0	1	0	0	0	5	1	1	2	1	1	0	0	0	0	6	37	2
89	2216124135	female	2003	Xi’an Jiaotong University	Freshman	Medicine	No	170	120	Urban	In good health	23	0	5	6	30	7.5	18	60	1	0	1	1	0	23	6.5	7.5	1	0	1	0	4	2	5	0	1	1	1	1	1	1	0	0	6	41	3
90	2203712749	male	2002	Xi’an Jiaotong University	Sophomore	Engineering	No	181	185	Urban	General health condition	23	30	30	7	0	7	19	92.5	0	1	0	1	1	23.5	7	7.5	0.933333	0	1	0	2	1	4	0	0	0	0	0	0	0	0	0	0	31	3
91	3152020001	male	2002	Xi’an Jiaotong University	Sophomore	Science	No	176	117	Rural	General health condition	0	0	10	6	0	6	19	58.5	1	0	1	1	2	0	6	6	1	0	1	0	1	1	6	0	0	1	0	1	1	0	1	0	4	39	1
92	2215311772	male	2003	Xi’an Jiaotong University	Freshman	Engineering	No	177	132	Rural	General health condition	23	0	10	6	0	6	18	66	1	0	0	0	2	23	6	7	0.857143	0	1	0	4	2	6	1	2	2	1	2	1	2	0	0	11	41	1
93	2216123617	female	2003	Xi’an Jiaotong University	Freshman	Engineering	No	167	110	Rural	General health condition	23	0	10	7	0	7	18	55	2	0	1	1	1	23	7	8	0.875	0	2	0	6	3	9	0	1	0	2	0	1	2	1	0	7	66	1
94	2211120530	female	2003	Xi’an Jiaotong University	Freshman	Science	No	160	100	Urban	In good health	0	0	10	7	0	7	18	50	1	0	1	1	1	0	7	7	1	0	1	0	3	2	6	1	0	0	1	1	0	2	0	0	5	68	3
95	2203211424	male	2002	Xi’an Jiaotong University	Freshman	Engineering	No	181	150	Urban	General health condition	0	0	30	8	0	7.5	19	75	2	1	2	2	0	0	8	8	0.9375	0	2	0	6	3	9	1	1	1	1	2	0	0	0	0	6	41	3
96	2213321069	female	2002	Xi’an Jiaotong University	Freshman	Engineering	No	165	96	Urban	General health condition	0	0	30	7	0	6	19	48	2	1	2	2	2	0	7	7	0.857143	0	1	0	6	3	10	0	0	0	1	1	0	0	0	0	2	48	2
97	2186123266	female	1999	Xi’an Jiaotong University	Senior	Humanities and SocialSciences	No	160	110	Urban	General health condition	2	0	20	8	0	5	22	55	2	1	2	2	2	2	8	6	0.833333	1	1	0	6	3	11	1	1	1	1	1	0	1	0	0	6	36	3
98	2211324759	female	2003	Xi’an Jiaotong University	Freshman	Engineering	No	165	120	Urban	In good health	23	0	10	6	0	7	18	60	0	0	0	0	1	23	6	7	1	0	0	0	1	1	2	0	0	1	0	1	0	0	0	0	2	30	1
99	2213722848	female	2003	Xi’an Jiaotong University	Freshman	Engineering	No	162	106	Rural	In good health	23	0	30	7	0	8	18	53	1	1			0	23	7	8	1	0		0	2	1		1	0	0	0	1	0	1	0	0	3	58	1
100	2213712838	male	2003	Xi’an Jiaotong University	Freshman	Engineering	No	177	106	Rural	In good health	0	0	15	7	0	6.5	18	53	2	0	3	2	1	0	7	7	0.928571	0	1	0	5	3	9	1	1	2	1	1	0	1	3	1	11	68	1
101	2214120241	female	2002	Xi’an Jiaotong University	Freshman	Engineering	No	166	128	Rural	In good health	23	0	30	7	0	8	19	64	2	1	1	1	0	23	7	8	1	0	2	0	6	3	8	1	0	1	1	0	0	1	0	0	4	32	1
102	2216211427	male	2004	Xi’an Jiaotong University	Freshman	Engineering	No	171	136	Rural	General health condition	23	0	15	6	0	6	17	68	2	0	2	1	2	23	6	7	0.857143	0	2	0	2	1	8	1	1	1	0	1	0	1	0	0	5	55	1
103	2201424808	female	2002	Xi’an Jiaotong University	Sophomore	Humanities and SocialSciences	No	172	116	Urban	In good health	23	0	20	7	30	8	19	58	0	1	0	1	0	23	7.5	8.5	0.941176	0	1	0	2	1	3	0	0	0	1	1	0	1	0	0	3	40	1
104		male		Xi’an Jiaotong University	Senior	Engineering	No	170	140	Rural	General health condition	0	0	10	8	0	8		70	0	0	0	0	0	0	8	8	1	0	0	0	2	1	1	1	1	0	0	0	0	0	0	0	2	17	1
105	2183311157	male	2001	Xi’an Jiaotong University	Senior	Engineering	No	160	110	Rural	General health condition	0	0	60	9	0	8	20	55	1	2	2	2	0	0	9	9	0.888889	0	1	1	6	3	8	1	0	0	1	1	0	1	1	0	5	25	1
106	2204312628	male	2002	Xi’an Jiaotong University	Sophomore	Engineering	No	167	108	Rural	In good health	0	0	1	8	0	7	19	54	3	0	1	1	1	0	8	8	0.875	0	2	0	6	3	10	3	3	3	3	0	3	3	3	1	22	70	1
107		female	2002	Xi’an Jiaotong University	Senior	Engineering	No	159	104	Rural	In good health	1	0	31	7	0	5.5	19	52	1	2	1	2	2	1	7	6	0.916667	0		0	1	1		0	0	0	1	1	1	1	0	0	4	26	1
108		female	2000	Xi’an Jiaotong University	Senior	Engineering	No	165	105	Urban	General health condition	0	0	30	7	30	8	21	52.5	2	1	2	2	0	0	7.5	7.5	1.06667	0	1	0	6	3	8	2	2	2	2	0	2	2	0	0	12	49	3
109		male	2000	Xi’an Jiaotong University	Senior	Engineering	No	179	196	Rural	In poor health	0	0	7	7	0	7	21	98	1	0	0	0	1	0	7	7	1	0	1	0	0	0	3	0	0	0	0	1	1	0	0	0	2	20	2
110	2186412634	male	2000	Xi’an Jiaotong University	Senior	Engineering	No	173	147	Rural	General health condition	1	0	5	8	0	6	21	73.5	0	0	0	0	2	1	8	7	0.857143	0	1	0	2	1	4	0	0	0	1	1	0	1	0	0	3	41	1
111	3220209028	male	1999	Xi’an Jiaotong University	Senior	Engineering	No	179	160	Urban	In good health	2	0	0	7	0	5	22	80	1	0	0	0	2	2	7	5	1	0	1	0	0	0	4	1	0	1	1	0	0	0	0	0	3	25	3
112	2185210274	male	2000	Xi’an Jiaotong University	Senior	Engineering	No	175	106	Rural	General health condition	0	0	30	7	30	7	21	53	0	1	1	1	1	0	7.5	7.5	0.933333	0	0	0	0	0	2	0	0	0	0	0	0	0	0	0	0	35	1
113		female	2000	Xi’an Jiaotong University	Senior	Engineering	No	170	110	Urban	General health condition	1	0	5	7	0	6	21	55	1	0	0	0	2	1	7	6	1	0	1	0	4	2	6	1	1	1	1	1	1	1	1	0	8	40	3
114	2185220284	female	2000	Xi’an Jiaotong University	Senior	Engineering	No	160	98	Urban	General health condition	0	0	20	7	0	6	21	49	2	1	1	1	2	0	7	7	0.857143	0	2	0	5	3	10	1	1	0	1	1	1	0	0	0	5	37	3
115	2184520125	female	2000	Xi’an Jiaotong University	Senior	Engineering	No	170	136	Rural	In very good health	0	0	10	7	0	7	21	68	1	0	0	0	1	0	7	7	1	0	1	0	2	1	4	1	1	0	1	1	0	0	0	0	4	28	3
116	2186114066	male	2000	Xi’an Jiaotong University	Senior	Engineering	No	192	170	Urban	In good health	1	0	5	7	0	6	21	85	1	0	0	0	2	1	7	6	1	0	0	0	6	3	6	1	0	0	2	0	0	0	0	0	3	27	1
117	2183612088	male	2000	Xi’an Jiaotong University	Senior	Engineering	No	177	260	Urban	In very poor health	23	0	120	9	0	7	21	130	3	3	3	3	1	23	9	10	0.7	2	2	0	6	3	14	3	3	3	3	3	3	3	0	0	21	30	1
118	2186512512	male	1999	Xi’an Jiaotong University	Senior	Engineering	No	170	125	Urban	In very good health	0	0	10	7	30	7	22	62.5	1	0	0	0	1	0	7.5	7.5	0.933333	0	0	0	0	0	2	2	1	0	0	0	0	0	0	0	3	20	3
119	2186123571	female	2000	Xi’an Jiaotong University	Senior	Engineering	No	166	140	Urban	In poor health	1	0	30	7	20	6	21	70	2	1	2	2	2	1	7.33333	6.33333	0.947368	0	0	0	3	2	8	1	0	1	2	0	0	1	1	0	6	46	3
120	2183221390	female	2000	Xi’an Jiaotong University	Senior	Engineering	No	164	150	Urban	In good health	23	30	30	7	20	6	21	75	1	1	2	2	2	23.5	7.33333	7.83333	0.765957	1	1	0	6	3	10	2	0	0	1	3	1	1	0	0	8	36	1
121	2185122321	female	2001	Xi’an Jiaotong University	Senior	Engineering	No	163	98	Urban	General health condition	0	0	5	7	0	7	20	49	1	0	1	1	1	0	7	7	1	0	1	0	2	1	5	0	1	1	1	0	2	0	0	0	5	21	3
122	42110117	male	2003	Shaanxi Normal University	Freshman		Yes	190	184	Rural	In very good health	23	0	60	6	30	7	18	92	1	2	2	2	1	23	6.5	7.5	0.933333	0	1	0	0	0	5	0	0	0	0	0	0	0	0	0	0	17	1
123	42010161	female	2001	Shaanxi Normal University	Sophomore		Yes	176	230	Urban	In good health	1	0	30	7	0	6	20	115	2	1	1	1	2	1	7	6	1	0	1	0	6	3	9	1	1	2	2	1	0	1	0	0	8	37	1
124	42110118	male	2002	Shaanxi Normal University	Freshman		Yes	177	200	Rural	In very good health	22	0	20	6	8	8	19	100	1	1	1	1	0	22	6.13333	8.13333	0.983607	0	0	0	0	0	2	0	0	0	0	0	0	0	0	0	0	17	1
125	42010151	female	2001	Shaanxi Normal University	Sophomore		Yes	175	200	Urban	In very good health	23	0	5	8	0	9	20	100	0	0	0	0	0	23	8	9	1	0	1	0	0	0	1	0	0	0	0	0	0	0	0	0	0	25	2
126	42110143	female	2003	Shaanxi Normal University	Freshman	Humanities and SocialSciences	Yes	158	108	Rural	In good health	23	0	30	7	0	8	18	54	1	1	2	2	0	23	7	8	1	0	0	0	0	0	3	1	0	0	0	1	0	0	0	1	3	20	1
127	42010101	male	2002	Shaanxi Normal University	Sophomore	Humanities and SocialSciences	Yes	185	208	Urban	In very good health	23	0	120	8	0	5	19	104	3	3	3	3	2	23	8	9	0.555556	3	1	0	4	2	14	0	0	3	1	1	0	0	0	0	5	37	2
128	42110139	female	2000	Shaanxi Normal University	Freshman		Yes	168	195	Rural	In very good health	22	0	10	7	0	8	21	97.5	1	0	0	0	0	22	7	9	0.888889	0	1	0	1	1	3	0	0	0	1	0	0	0	0	0	1	22	1
129	41910131	male	2001	Shaanxi Normal University	Junior	Science	Yes	188	198	Urban	In very good health	23	0	15	8	0	7.5	20	99	2	0	0	0	0	23	8	9	0.833333	1	1	0	2	1	5	0	0	1	1	0	0	0	0	0	2	21	1
130	42016107	male	2001	Shaanxi Normal University	Sophomore	Science	No	196	200	Rural	In very good health	1	0	3	7	0	5	20	100	0	0	0	0	2	1	7	6	0.833333	1	0	0	0	0	3	0	0	0	0	0	0	0	0	0	0	23	3
131	42110138	female	2002	Shaanxi Normal University	Freshman	Science	Yes	174	190	Urban	In very good health	23	0	10	6	30	7	19	95	1	0	0	0	1	23	6.5	7.5	0.933333	0	1	0	1	1	4	0	0	0	0	0	0	0	0	0	0	20	3
132	42110107	male	2002	Shaanxi Normal University	Freshman	Science	Yes	180	165	Rural	In very good health	23	0	15	6	0	7	19	82.5	1	0	1	1	1	23	6	7	1	0	0	0	0	0	3	0	0	1	0	0	0	0	0	0	1	17	1
133	41910115	male	2001	Shaanxi Normal University	Junior	Humanities and SocialSciences	Yes	191	260	Urban	In very good health	1	0	20	8	0	8	20	130	0	1	0	1	0	1	8	7	1.14286	0	1	0	2	1	3	0	0	2	0	1	0	2	0	0	5	32	1
134	40910150	female	1998	Shaanxi Normal University	Junior		Yes	172	159	Urban	In good health	0	0	30	8	0	7.5	23	79.5	1	1	2	2	0	0	8	8	0.9375	0	1	0	2	1	5	0	0	0	0	2	0	0	0	0	2	37	1
135	42110100	female	2003	Shaanxi Normal University	Freshman	Science	No	166	108	Rural	In good health	22	0	30	7	0	8	18	54	1	1	1	1	0	22	7	9	0.888889	0	0	0	0	0	2	0	0	0	0	0	0	0	0	0	0	34	1
136	42110098	female	2002	Shaanxi Normal University	Freshman	Science	No	166	128	Rural	In good health	23	0	15	7	0	8	19	64	0	0	1	1	0	23	7	8	1	0	1	0	2	1	3	1	1	0	1	1	2	1	0	0	7	32	1
137	4211088	female	2002	Shaanxi Normal University	Freshman	Science	Yes	159	110	Rural	In good health	23	0	30	8	0	6	19	55	1	1	2	2	2	23	8	9	0.666667	2	1	0	3	2	10	0	0	0	0	1	0	1	0	0	2	30	2
138	42110090	female	2003	Shaanxi Normal University	Freshman	Science	Yes	158	104	Rural	In good health	22	0	50	6	0	7	18	52	1	2	3	3	1	22	6	8	0.875	0	1	0	5	3	9	0	0	2	1	1	0	0	0	0	4	54	1
139	41210093	female	2002	Shaanxi Normal University	Freshman	Science	Yes	167	110	Rural	In good health	0	0	20	6	0	6	19	55	2	1	2	2	2	0	6	6	1	0	1	0	2	1	8	0	0	1	1	1	0	0	0	0	3	48	1
140	42110091	female	2002	Shaanxi Normal University	Freshman	Science	Yes	165	88	Rural	In very good health	0	0	20	7	0	7	19	44	0	1	0	1	1	0	7	7	1	0	0	0	0	0	2	1	1	0	0	0	0	1	0	0	3	32	1
141	42110095	female	2001	Shaanxi Normal University	Freshman		Yes	162	120	Rural	In good health	23	0	20	6	0	7	20	60	1	1	0	1	1	23	6	7	1	0	0	0	0	0	3	0	0	0	0	0	0	0	0	0	0	21	1
142	42110097	female	2001	Shaanxi Normal University	Freshman		Yes	156	104	Rural	In good health	23	0	30	6	0	7	20	52	1	1	0	1	1	23	6	7	1	0	1	0	0	0	4	0	0	0	0	0	0	0	0	0	0	17	1
143	42110092	female	2002	Shaanxi Normal University	Freshman	Science	Yes	172	132	Rural	In good health	23	0	20	7	0	7	19	66	0	1	1	1	1	23	7	8	0.875	0	1	0	2	1	4	1	1	0	0	0	1	1	0	0	4	24	1
144	42110089	female	2003	Shaanxi Normal University	Freshman		Yes	164	120	Urban	In good health	23	0	5	7	0	7	18	60	1	0	1	1	1	23	7	8	0.875	0	1	0	3	2	6	0	0	0	1	1	0	0	0	0	2	30	1
145	42110099	female	2002	Shaanxi Normal University	Freshman	Humanities and SocialSciences	Yes	162	106	Rural	General health condition	21	30	3	6	0	8	19	53	1	0	1	1	0	21.5	6	8.5	0.941176	0	0	0	0	0	2	0	0	0	0	0	0	0	0	0	0	17	3
146	42110096	female	2001	Shaanxi Normal University	Freshman	Humanities and SocialSciences	Yes	163	96	Urban	In very good health	22	0	20	6	0	8	20	48	1	1	1	1	0	22	6	8	1	0	2	0	2	1	5	0	0	1	0	1	0	0	0	0	2	30	1
147	42110087	female	2003	Shaanxi Normal University	Freshman	Humanities and SocialSciences	Yes	170	120	Rural	In very good health	22	0	60	7	0	7	18	60	1	2	2	2	1	22	7	9	0.777778	1	1	0	2	1	7	0	0	0	0	0	0	0	0	0	0	26	1
148	42110094	female	2004	Shaanxi Normal University	Freshman	Science	Yes	162	130	Urban	In good health	22	0	30	7	0	9	17	65	2	1	2	2	0	22	7	9	1	0	2	0	4	2	8	1	1	1	1	1	0	0	0	0	5	28	1
149	42010065	male	2000	Shaanxi Normal University	Sophomore	Humanities and SocialSciences	Yes	180	150	Rural	In good health	23	0	30	8	0	8	21	75	1	1	3	2	0	23	8	9	0.888889	0	1	0	0	0	4	0	0	0	0	0	0	0	0	0	0	22	1
150	41910021	male	1998	Shaanxi Normal University	Junior	Engineering	Yes	184	140	Rural	General health condition	23	0	30	8	0	8	23	70	1	1	2	2	0	23	8	9	0.888889	0	1	0	3	2	6	1	0	0	0	0	0	0	0	0	1	35	1
151	41910060	male	2001	Shaanxi Normal University	Junior	Science	Yes	171	136	Rural	In good health	0	0	30	9	0	7	20	68	1	1	1	1	1	0	9	9	0.777778	1	1	0	3	2	7	0	0	0	0	0	0	0	0	0	0	30	1
152	41910031	male	2001	Shaanxi Normal University	Junior	Science	Yes	176	144	Rural	In good health	0	0	30	8	0	7	20	72	1	1	2	2	1	0	8	8	0.875	0	2	0	2	1	7	1	1	1	1	1	0	1	1	0	7	19	1
153	42010165	male	2000	Shaanxi Normal University	Sophomore	Science	Yes	185	140	Rural	In very good health	0	0	20	8	0	7	21	70	2	1	2	2	1	0	8	8	0.875	0	1	0	1	1	7	1	1	2	1	1	1	2	1	1	11	45	3
154	41910082	female	2001	Shaanxi Normal University	Junior	Science	Yes	170	114	Rural	In good health	23	0	10	7	0	8	20	57	1	0	0	0	0	23	7	8	1	0	1	0	0	0	2	0	0	0	0	0	0	0	0	0	0	24	1
155	41910081	female	1999	Shaanxi Normal University	Junior	Humanities and SocialSciences	Yes	170	120	Rural	In very good health	23	0	30	7	0	8	22	60	0	1	1	1	0	23	7	8	1	0	1	0	1	1	3	0	1	1	0	1	1	1	1	0	6	33	3
156	41910041	male	2000	Shaanxi Normal University	Junior	Science	Yes	173	145	Rural	In very good health	0	0	30	9	0	7	21	72.5	0	1	1	1	1	0	9	9	0.777778	1	1	0	1	1	5	0	0	0	0	0	0	0	0	0	0	27	1
157	41910018	male	2000	Shaanxi Normal University	Junior	Science	Yes	187	148	Rural	In good health	0	0	30	7	0	8	21	74	1	1	0	1	0	0	7	7	1.14286	0	0	0	0	0	2	0	0	0	0	0	0	0	0	0	0	22	1
158	41910034	male	1999	Shaanxi Normal University	Junior	Humanities and SocialSciences	Yes	180	181	Rural	In very good health	0	0	30	7	0	8	22	90.5	0	1	3	2	0	0	7	7	1.14286	0	1	0	0	0	3	1	1	1	0	0	0	2	2	0	7	34	1
159	41910057	male	2001	Shaanxi Normal University	Junior	Science	Yes	180	155	Rural	In good health	23	0	120	8	0	8	20	77.5	1	3	1	2	0	23	8	9	0.888889	0	1	0	0	0	4	0	0	0	0	0	0	0	0	0	0	19	1
160	200794	male	1996	Shaanxi Normal University	Master	Humanities and SocialSciences	Yes	178	156	Rural	In good health	0	0	30	8	0	6	25	78	1	1	0	1	2	0	8	8	0.75	1	0	0	0	0	5	0	0	0	0	0	0	0	0	0	0	17	1
161	190632	male	1993	Shaanxi Normal University	Master	Humanities and SocialSciences	Yes	173	130	Rural	In very good health	23	0	15	8	0	8	28	65	1	0	1	1	0	23	8	9	0.888889	0	1	0	0	0	3	0	0	0	0	0	0	0	0	0	0	18	1
162	190628	male	1996	Shaanxi Normal University	Master	Humanities and SocialSciences	Yes	178	130	Rural	In very good health	0	0	30	7	0	6.5	25	65	1	1	2	2	1	0	7	7	0.928571	0	1	0	2	1	6	0	0	0	0	0	0	1	1	0	2	19	1
163	190633	male	1995	Shaanxi Normal University	Master	Humanities and SocialSciences	No	178	120	Urban	In very good health	0	0	30	7	0	6.5	26	60	1	1	2	2	1	0	7	7	0.928571	0	1	0	2	1	6	0	0	0	0	0	0	1	0	0	1	33	1
164	190719	male	1996	Shaanxi Normal University	Master	Humanities and SocialSciences	Yes	171	124	Urban	In good health	0	0	15	7	0	6.5	25	62	1	0	2	1	1	0	7	7	0.928571	0	2	0	4	2	7	1	1	0	1	1	2	1	1	0	8	58	1
165	190674	male	1995	Shaanxi Normal University	Master	Humanities and SocialSciences	No	170	114	Urban	In good health	23	0	5	7	0	7	26	57	1	0	1	1	1	23	7	8	0.875	0	1	0	0	0	4	1	1	0	1	0	0	0	0	0	3	46	1
166	190678	female	1998	Shaanxi Normal University	Master	Humanities and SocialSciences	Yes	159	113	Rural	In very good health	23	0	20	7	0	7.5	23	56.5	1	1	1	1	0	23	7	8	0.9375	0	1	0	3	2	5	1	1	1	1	0	0	1	1	0	6	60	1
167	20210711	male	1996	Shaanxi Normal University	Master	Humanities and SocialSciences	Yes	186	194	Urban	In good health	0	0	30	7	0	6	25	97	2	1	3	2	2	0	7	7	0.857143	0	2	2	6	3	13	0	0	1	0	0	0	0	0	0	1	19	1
168	20210786	female	1999	Shaanxi Normal University	Master	Humanities and SocialSciences	Yes	168	130	Urban	In good health	0	0	10	8	0	8	22	65	1	0	0	0	0	0	8	8	1	0	1	0	4	2	4	1	1	0	0	0	0	1	0	0	3	38	1
169	200822	male	1993	Shaanxi Normal University	Master	Humanities and SocialSciences	Yes	172	126	Rural	In good health	23	0	20	7	0	7	28	63	1	1	1	1	1	23	7	8	0.875	0	1	0	2	1	5	1	1	1	0	0	0	1	1	0	5	35	1
170	200812	male	1995	Shaanxi Normal University	Master	Humanities and SocialSciences	Yes	180	140	Rural	In good health	0	0	15	8	0	5	26	70	1	0	0	0	2	0	8	8	0.625	3	1	0	4	2	9	0	0	1	0	0	0	0	0	0	1	44	1
171	200821	male	1995	Shaanxi Normal University	Master	Humanities and SocialSciences	Yes	175	140	Rural	In very good health	0	0	30	8	0	8	26	70	1	1	0	1	0	0	8	8	1	0	0	0	0	0	2	0	0	0	0	0	0	0	0	0	0	29	1
172	190667	female	1997	Shaanxi Normal University	Master	Humanities and SocialSciences	Yes	169	105	Urban	In good health	0	0	10	8	30	8	24	52.5	1	0	0	0	0	0	8.5	8.5	0.941176	0	1	0	2	1	3	2	1	1	1	1	1	1	0	0	8	51	3
173	190630	female	1996	Shaanxi Normal University	Master	Humanities and SocialSciences	Yes	165	118	Rural	General health condition	23	0	5	8	0	8	25	59	1	0	2	1	0	23	8	9	0.888889	0	1	0	6	3	6	2	1	2	3	3	1	2	1	0	15	43	1
174	200806	female	1998	Shaanxi Normal University	Master	Humanities and SocialSciences	Yes	160	96	Rural	In good health	0	0	30	8	0	7	23	48	2	1	3	2	1	0	8	8	0.875	0	1	0	4	2	8	0	0	2	1	0	0	0	0	0	3	43	1
175		male	1998	Shaanxi Normal University	Master	Science	Yes	175	140	Rural	In very good health	23	30	10	7	20	7	23	70	0	0	0	0	1	23.5	7.33333	7.83333	0.893617	0	1	0	4	2	4	0	0	0	1	1	0	1	0	0	3	47	1
176	200805	male	1999	Shaanxi Normal University	Master	Humanities and SocialSciences	Yes	182	140	Rural	In good health	23	0	20	7	0	7	22	70	1	1	0	1	1	23	7	8	0.875	0	1	0	0	0	4	0	0	0	0	0	0	0	0	0	0	20	1
177	200807	female	1997	Shaanxi Normal University	Master	Humanities and SocialSciences	Yes	170	110	Rural	In very good health	23	0	30	6	0	7	24	55	1	1	2	2	1	23	6	7	1	0	0	0	0	0	4	0	0	0	1	0	0	0	0	0	1	19	1
178	200817	male	1998	Shaanxi Normal University	PhD Candidate	Humanities and SocialSciences	Yes	178	140	Rural	In very good health	23	0	50	9	0	8	23	70	1	2	3	3	0	23	9	10	0.8	1	0	0	0	0	5	0	0	2	0	0	0	0	0	0	2	42	1
179	20210808	female	1998	Shaanxi Normal University	Master	Humanities and SocialSciences	No	160	90	Rural	In good health	23	0	30	7	0	6	23	45	1	1	0	1	2	23	7	8	0.75	1	1	0	0	0	6	0	0	0	0	1	0	1	0	0	2	35	1
180	200800	female	1998	Shaanxi Normal University	Master	Science	Yes	160	114	Rural	In good health	0	0	30	7	0	8	23	57	0	1	0	1	0	0	7	7	1.14286	0	1	0	0	0	2	0	0	0	0	0	0	0	0	0	0	28	1
181	200301	female	1998	Shaanxi Normal University	Master	Humanities and SocialSciences	Yes	165	130	Urban	In good health	0	0	30	8	0	8	23	65	1	1	1	1	0	0	8	8	1	0	1	0	2	1	4	1	1	1	1	1	0	0	0	0	5	22	1
182	200799	female	1997	Shaanxi Normal University	Master	Humanities and SocialSciences	Yes	163	106	Rural	In good health	23	30	20	7	30	8	24	53	1	1	1	1	0	23.5	7.5	8	1	0	1	0	2	1	4	1	1	0	1	1	1	1	0	0	6	39	1
183	200798	female	1996	Shaanxi Normal University	Master	Humanities and SocialSciences	Yes	165	115	Rural	In good health	23	0	30	7	0	8	25	57.5	1	1	1	1	0	23	7	8	1	0	1	0	2	1	4	1	0	1	1	1	1	1	1	0	7	35	1
184	200793	female	1998	Shaanxi Normal University	Master	Humanities and SocialSciences	Yes	163	106	Rural	In good health	0	0	30	7	0	7	23	53	2	1	2	2	1	0	7	7	1	0	1	0	6	3	9	1	1	1	1	1	1	1	1	1	9	47	1
185	20210754	female	1998	Shaanxi Normal University	Master	Humanities and SocialSciences	Yes	161	106	Rural	In good health	23	30	10	6	45	7	23	53	0	0	0	0	1	23.5	6.75	7.25	0.965517	0	1	0	1	1	3	0	0	0	0	0	0	0	0	0	0	17	1
186	200789	male	1996	Shaanxi Normal University	Master	Humanities and SocialSciences	Yes	173	125	Rural	In good health	1	0	15	8	0	6	25	62.5	1	0	1	1	2	1	8	7	0.857143	0	1	0	2	1	6	1	1	1	1	1	1	1	1	0	8	33	3
187	20210813	female	1998	Shaanxi Normal University	Master	Humanities and SocialSciences	Yes	172	120	Rural	In good health	23	0	30	7	0	7	23	60	1	1	0	1	1	23	7	8	0.875	0	1	0	1	1	5	0	1	0	1	0	0	1	0	0	3	30	1
188	2000104	male	1998	Shaanxi Normal University	Master	Humanities and SocialSciences	Yes	183	157	Rural	In good health	23	0	20	7	0	8	23	78.5	0	1	1	1	0	23	7	8	1	0	1	0	0	0	2	0	0	1	0	0	0	0	0	0	1	31	1
189	20210822	female	1999	Shaanxi Normal University	Master	Humanities and SocialSciences	Yes	163	102	Rural	In good health	23	0	30	7	0	8	22	51	1	1	0	1	0	23	7	8	1	0	1	0	2	1	4	0	1	1	1	0	1	0	0	0	4	26	1
190	20210819	female	1998	Shaanxi Normal University	Master	Humanities and SocialSciences	Yes	167	120	Rural	In very good health	23	0	30	7	0	7	23	60	1	1	1	1	1	23	7	8	0.875	0	1	0	3	2	6	0	0	0	1	1	0	1	0	0	3	54	1
191	42002245	female	2002	Shaanxi Normal University	Sophomore	Humanities and SocialSciences	No	160	110	Urban	In good health	0	0	30	6	40	6	19	55	1	1	1	1	2	0	6.66667	6.66667	0.9	0	1	0	2	1	6	1	1	1	1	1	0	1	0	0	6	40	3
192	42002220	female	2002	Shaanxi Normal University	Sophomore	Humanities and SocialSciences	No	160	98	Rural	In poor health	0	0	60	7	0	5	19	49	2	2	3	3	2	0	7	7	0.714286	2	1	0	6	3	13	0	0	2	2	2	0	1	0	0	7	66	1
193	42002164	female	2002	Shaanxi Normal University	Sophomore	Humanities and SocialSciences	No	162	140	Rural	In good health	0	0	30	7	0	6	19	70	1	1	1	1	2	0	7	7	0.857143	0	1	0	2	1	6	1	1	1	0	0	0	1	0	0	4	43	1
194	42002133	female	2002	Shaanxi Normal University	Sophomore	Humanities and SocialSciences	No	160	100	Rural	General health condition	23	0	60	6	30	6.5	19	50	1	2	1	2	1	23	6.5	7.5	0.866667	0	1	0	3	2	7	0	1	0	1	0	1	1	0	0	4	55	3
195	42002032	female	2002	Shaanxi Normal University	Sophomore	Humanities and SocialSciences	No	168	104	Urban	In good health	23	0	2	6	44	6.5	19	52	1	0	1	1	1	23	6.73333	7.73333	0.840517	1	1	0	2	1	6	1	1	1	1	0	0	0	1	0	5	34	2
196	42002026	female	2002	Shaanxi Normal University	Sophomore	Humanities and SocialSciences	No	162	120	Urban	General health condition	23	0	10	7	0	7	19	60	0	0	0	0	1	23	7	8	0.875	0	0	0	0	0	1	0	0	0	0	0	0	0	0	0	0	41	3
197	42002199	female	2001	Shaanxi Normal University	Sophomore	Humanities and SocialSciences	No	160	135	Rural	In poor health	0	0	30	7	0	8	20	67.5	1	1	1	1	0	0	7	7	1.14286	0	1	0	4	2	5	1	0	1	1	1	1	1	1	0	7	20	1
198	42002117	female	2002	Shaanxi Normal University	Sophomore	Humanities and SocialSciences	No	160	112	Urban	General health condition	23	0	30	7	0	7	19	56	1	1	1	1	1	23	7	8	0.875	0	1	0	5	3	7	1	0	0	0	0	0	0	0	0	1	36	2
199	42002195	female	2001	Shaanxi Normal University	Sophomore	Humanities and SocialSciences	No	162	108	Urban	In poor health	1	0	20	6	0	6	20	54	1	1	2	2	2	1	6	5	1.2	0	1	0	2	1	7	1	0	1	1	1	0	0	0	0	4	21	2
200	42002214	female	2002	Shaanxi Normal University	Sophomore	Humanities and SocialSciences	No	173	140	Urban	In good health	23	0	2	6	0	7	19	70	0	0	0	0	1	23	6	7	1	0	0	0	1	1	2	0	0	0	0	0	0	0	0	0	0	23	2
201	42002205	female	1998	Shaanxi Normal University	Sophomore	Humanities and SocialSciences	No	172	148	Urban	General health condition	1	0	10	7	0	6	23	74	1	0	1	1	2	1	7	6	1	0	1	0	3	2	7	0	0	0	1	1	0	0	0	0	2	39	1
202	42002251	female	2002	Shaanxi Normal University	Sophomore	Humanities and SocialSciences	No	173	120	Urban	In very good health	0	0	1	6	45	7	19	60	0	0	0	0	1	0	6.75	6.75	1.03704	0	0	0	0	0	1	0	0	0	0	0	0	0	0	0	0	29	3
203	42002188	female	2002	Shaanxi Normal University	Sophomore	Humanities and SocialSciences	No	174	118	Urban	In good health	0	0	10	7	0	7	19	59	0	0	0	0	1	0	7	7	1	0	1	0	6	3	5	1	1	0	0	2	0	1	0	1	6	40	3
204	42002066	female	2001	Shaanxi Normal University	Sophomore	Humanities and SocialSciences	No	161	120	Urban	In poor health	0	30	60	7	0	5.5	20	60	2	2	3	3	2	0.5	7	6.5	0.846154	1	1	0	6	3	12	1	1	1	1	2	1	2	2	0	11	64	1
205	42002071	female	2002	Shaanxi Normal University	Sophomore	Humanities and SocialSciences	No	160	91	Urban	In good health	0	0					19	45.5	1		2			0					1	0	2	1		1	1	1	1	1	0	1	0	0	6	29	3
206	42002236	female	2002	Shaanxi Normal University	Sophomore	Humanities and SocialSciences	No	160	120	Rural	In good health	0	30	1	7	15	7	19	60	0	0	0	0	1	0.5	7.25	6.75	1.03704	0	1	0	1	1	3	0	0	0	0	0	0	0	0	0	0	18	1
207	42002192	female	2001	Shaanxi Normal University	Sophomore	Humanities and SocialSciences	No	170	140	Rural	In good health	0	0	2	7	0	7	20	70	0	0	0	0	1	0	7	7	1	0	1	0	0	0	2	0	0	0	0	2	0	0	0	0	2	17	1
208	42002068	female	2003	Shaanxi Normal University	Sophomore	Humanities and SocialSciences	No	155	98	Rural	In poor health	23	0	10	7	0	7.5	18	49	1	0	1	1	0	23	7	8	0.9375	0	1	0	2	1	4	1	1	0	1	2	0	2	0	0	7	57	1
209	42002031	female	2002	Shaanxi Normal University	Sophomore	Humanities and SocialSciences	No	168	105	Urban	In good health	0	0	5	7	0	7	19	52.5	0	0	0	0	1	0	7	7	1	0	0	0	0	0	1	0	0	0	0	0	0	0	0	0	0	25	3
210	42002043	female	2001	Shaanxi Normal University	Sophomore	Humanities and SocialSciences	No	153	92	Rural	In good health	23	0	30	7	0	7	20	46	1	1	2	2	1	23	7	8	0.875	0	2	0	3	2	8	1	1	1	1	1	1	1	1	0	8	43	1
211	42002048	female	2002	Shaanxi Normal University	Sophomore	Humanities and SocialSciences	No	168	100	Rural	General health condition	23	30	30	6	40	7	19	50	1	1	1	1	1	23.5	6.66667	7.16667	0.976744	0	1	0	1	1	5	0	0	0	1	0	0	0	0	0	1	20	1
212	42002278	female	2001	Shaanxi Normal University	Sophomore	Humanities and SocialSciences	No	156	80	Rural	In very good health	23	0	5	7	0	8	20	40	1	0	0	0	0	23	7	8	1	0	1	0	2	1	3	0	0	0	0	0	0	0	0	0	0	38	1
213	42002174	female	2000	Shaanxi Normal University	Sophomore	Humanities and SocialSciences	No	160	80	Rural	In good health	0	0	30	6	40	7	21	40	0	1	1	1	1	0	6.66667	6.66667	1.05	0	2	0	6	3	7	0	0	0	0	0	0	1	0	0	1	41	1
214	42002172	female	2002	Shaanxi Normal University	Sophomore	Humanities and SocialSciences	No	160	108	Urban	In good health	0	0	20	7	0	6	19	54	1	1	1	1	2	0	7	7	0.857143	0	1	0	4	2	7	0	1	0	0	0	0	0	0	0	1	33	3
215	42002119	female	2002	Shaanxi Normal University	Sophomore	Humanities and SocialSciences	No	170	138	Urban	In good health	0	0	10	7	0	6	19	69	0	0	0	0	2	0	7	7	0.857143	0	0	0	1	1	3	0	0	0	0	0	0	0	0	0	0	34	3
216	42002018	female	2001	Shaanxi Normal University	Sophomore	Humanities and SocialSciences	No	163	98	Rural	In good health	23	30	20	7	0	7	20	49	1	1	2	2	1	23.5	7	7.5	0.933333	0	1	0	4	2	7	0	0	0	1	0	0	0	0	0	1	22	1
217	42002279	female	2001	Shaanxi Normal University	Sophomore	Humanities and SocialSciences	No	163	92	Rural	In good health	1	0	15	7	0	6	20	46	2	0	2	1	2	1	7	6	1	0	2	0	4	2	9	1	1	1	1	1	1	1	0	0	7	28	1
218	42002039	female	2002	Shaanxi Normal University	Sophomore	Humanities and SocialSciences	No	173	110	Urban	General health condition	0	0	30	6	0	6	19	55	1	1	2	2	2	0	6	6	1	0	1	0	4	2	8	1	1	1	1	1	1	1	0	0	7	24	2
219	42002296	female	2002	Shaanxi Normal University	Sophomore	Humanities and SocialSciences	No	170	106	Rural	General health condition	23	0	60	7	0	7	19	53	1	2	1	2	1	23	7	8	0.875	0	1	0	4	2	7	1	1	1	1	1	1	1	1	0	8	58	1
220	42002293	female	2002	Shaanxi Normal University	Sophomore	Humanities and SocialSciences	No	168	110	Urban	General health condition	1	0	60	7	0	5	19	55	2	2	3	3	2	1	7	6	0.833333	1	1	0	4	2	11	0	0	3	3	2	0	1	0	0	9	23	1
221	42002135	female	2002	Shaanxi Normal University	Sophomore	Humanities and SocialSciences	No	166	101	Rural	General health condition	23	0	10	7	0	7	19	50.5	1	0	1	1	1	23	7	8	0.875	0	1	0	1	1	5	1	0	1	1	0	0	0	0	0	3	22	1
222	42002287	female	2002	Shaanxi Normal University	Sophomore	Humanities and SocialSciences	No	172	104	Rural	In good health	2	0	0	7	0	6	19	52	0	0	0	0	2	2	7	5	1.2	0	1	0	6	3	6	0	0	0	0	0	0	0	0	0	0	17	2
223	42002203	female	2002	Shaanxi Normal University	Sophomore	Humanities and SocialSciences	No	168	110	Urban	General health condition	23	0	15	7	0	7	19	55	1	0	1	1	1	23	7	8	0.875	0	1	0	2	1	5	1	0	1	0	0	0	1	0	0	3	38	1
224	42015014	female	2002	Shaanxi Normal University	Sophomore	Humanities and SocialSciences	No	170	120	Rural	General health condition	23	20	5	6	40	7	19	60	2	0	1	1	1	23.3333	6.66667	7.33333	0.954546	0	1	0	2	1	6	0	0	0	0	0	0	0	0	0	0	17	3
225	42002234	female	2000	Shaanxi Normal University	Sophomore	Humanities and SocialSciences	No	160	108	Rural	In good health	23	0	20	7	0	8	21	54	1	1	1	1	0	23	7	8	1	0	1	0	2	1	4	1	1	1	1	2	1	1	1	0	9	33	1
226	42002159	male	2001	Shaanxi Normal University	Sophomore	Humanities and SocialSciences	No	175	139	Rural	In good health	23	30	10	6	30	7	20	69.5	1	0	0	0	1	23.5	6.5	7	1	0	1	0	1	1	4	0	0	0	0	0	0	0	0	0	0	27	1
227	42002108	male	2002	Shaanxi Normal University	Sophomore	Humanities and SocialSciences	No	174	140	Rural	In poor health	23	0	30	7	0	8	19	70	1	1	0	1	0	23	7	8	1	0	1	0	0	0	3	1	1	1	1	1	1	1	1	1	9	34	1
228	42002046	female	2002	Shaanxi Normal University	Sophomore	Humanities and SocialSciences	No	156	100	Rural	General health condition	0	0	5	7	0	6	19	50	1	0	0	0	2	0	7	7	0.857143	0	0	0	3	2	5	1	1	0	0	0	0	0	0	0	2	32	1
229	42002254	male	2002	Shaanxi Normal University	Sophomore	Humanities and SocialSciences	No	172	120	Urban	In good health	23	0	10	6	30	7	19	60	1	0	0	0	1	23	6.5	7.5	0.933333	0	0	0	0	0	2	1	1	1	1	1	1	1	1	1	9	33	2
230	42002024	female	2001	Shaanxi Normal University	Sophomore	Humanities and SocialSciences	No	162	112	Rural	General health condition	23	0	20	7	0	7	20	56	1	1	0	1	1	23	7	8	0.875	0	1	0	5	3	7	1	1	0	1	1	0	1	0	0	5	38	1
231	42002116	female	2002	Shaanxi Normal University	Sophomore	Humanities and SocialSciences	No	170	120	Rural	General health condition	23	0	30	7	0	7	19	60	1	1	2	2	1	23	7	8	0.875	0	1	0	0	0	5	1	0	0	0	0	0	0	0	0	1	39	1
232	42002053	male	1996	Shaanxi Normal University	Sophomore	Humanities and SocialSciences	No	181	140	Urban	In good health	0	0	3	6	0	5	25	70	1	0	0	0	2	0	6	6	0.833333	1	1	0	4	2	7	0	0	0	1	0	0	0	0	0	1	35	3
233	42002007	female	2002	Shaanxi Normal University	Sophomore	Humanities and SocialSciences	No	161	92	Urban	General health condition	0	30	30	6	30	5	19	46	2	1	2	2	2	0.5	6.5	6	0.833333	1	1	0	6	3	11	1	1	1	0	0	0	0	0	0	3	38	1
234	42002014	female	2001	Shaanxi Normal University	Sophomore	Humanities and SocialSciences	No	163	115	Rural	General health condition	0	0	20	6	0	6	20	57.5	2	1	2	2	2	0	6	6	1	0	1	0	6	3	10	1	1	1	1	1	0	3	0	0	8	59	1
235	42002233	female	2001	Shaanxi Normal University	Sophomore	Humanities and SocialSciences	No	155	100	Rural	General health condition	0	0	5	7	0	6	20	50	1	0	0	0	2	0	7	7	0.857143	0	1	0	6	3	7	1	2	1	2	2	3	2	0	0	13	40	1
236	42002138	female	2002	Shaanxi Normal University	Sophomore	Humanities and SocialSciences	No	161	116	Rural	In good health	23	30	10	7	0	7	19	58	1	0	1	1	1	23.5	7	7.5	0.933333	0	1	0	3	2	6	1	1	0	1	1	0	1	0	0	5	53	3
237	42002045	female	2002	Shaanxi Normal University	Sophomore	Humanities and SocialSciences	No	160	98	Urban	In good health	0	0	30	6	50	6	19	49	2	1	3	2	2	0	6.83333	6.83333	0.878049	0	1	0	3	2	9	1	1	1	1	1	0	0	0	0	5	49	2
238	42011073	female	2002	Shaanxi Normal University	Sophomore	Humanities and SocialSciences	No	165	106	Urban	General health condition	0	0	20	7	0	6	19	53	1	1	2	2	2	0	7	7	0.857143	0	1	0	3	2	8	0	0	0	1	2	0	0	0	0	3	49	1
239	42002042	female	2002	Shaanxi Normal University	Sophomore	Humanities and SocialSciences	No	170	110	Rural	General health condition	0	0	30	7	0	7	19	55	2	1	2	2	1	0	7	7	1	0	1	0	6	3	9	1	1	2	3	3	0	1	1	0	12	63	1
240	42002171	female	2002	Shaanxi Normal University	Sophomore	Humanities and SocialSciences	No	163	118	Urban	In good health	0	0	3	7	0	7	19	59	1	0	1	1	1	0	7	7	1	0	1	0	4	2	6	1	0	0	1	0	0	0	0	0	2	43	3
241	42002020	female	2001	Shaanxi Normal University	Sophomore	Humanities and SocialSciences	No	161	113	Rural	General health condition	23	0	20	6	30	7	20	56.5	1	1	1	1	1	23	6.5	7.5	0.933333	0	1	0	1	1	5	1	1	0	1	1	0	0	0	0	4	23	1
242	42002022	female	2002	Shaanxi Normal University	Sophomore	Humanities and SocialSciences	No	163	98	Rural	General health condition	0	0	20	7	0	7	19	49	1	1	1	1	1	0	7	7	1	0	1	0	2	1	5	1	0	0	0	0	1	1	0	0	3	31	1
243	42002028	female	2002	Shaanxi Normal University	Sophomore	Humanities and SocialSciences	No	165	135	Urban	In poor health	23	0	30	7	0	7	19	67.5	1	1	1	1	1	23	7	8	0.875	0	1	0	2	1	5	0	1	0	1	0	0	0	0	0	2	28	3
244	42002259	female	2002	Shaanxi Normal University	Sophomore	Humanities and SocialSciences	No	162	110	Urban	In good health	0	0	10	6	0	6	19	55	1	0	1	1	2	0	6	6	1	0	1	0	1	1	6	0	0	0	1	0	1	0	0	0	2	29	3
245	42002219	female	2000	Shaanxi Normal University	Sophomore	Humanities and SocialSciences	No	166	106	Urban	In very good health	23	30	10	7	0	7	21	53	0	0	0	0	1	23.5	7	7.5	0.933333	0	0	0	0	0	1	0	0	0	0	0	0	0	0	0	0	45	3
246	42002037	female	2003	Shaanxi Normal University	Sophomore	Humanities and SocialSciences	No	168	110	Rural	In good health	0	0	15	6	30	6	18	55	0	0	0	0	2	0	6.5	6.5	0.923077	0	1	0	4	2	5	0	0	0	0	1	0	1	0	0	2	66	1
247	42002142	female	2002	Shaanxi Normal University	Sophomore	Humanities and SocialSciences	No	168	150	Urban	General health condition	23	0	5	7	0	8	19	75	1	0	0	0	0	23	7	8	1	0	2	0	3	2	5	0	0	0	1	1	0	0	0	0	2	38	1
248	42002190	female	2002	Shaanxi Normal University	Sophomore	Humanities and SocialSciences	No	158	110	Rural	General health condition	1	0	30	7	0	6	19	55	1	1	0	1	2	1	7	6	1	0	1	0	6	3	8	1	1	1	1	1	0	1	0	0	6	41	1
249	42002264	female	2000	Shaanxi Normal University	Sophomore	Humanities and SocialSciences	No	156	82	Urban	In very good health	0	0	50	7	0	6	21	41	0	2	0	1	2	0	7	7	0.857143	0	0	0	0	0	3	0	0	0	0	0	0	0	0	0	0	51	1
250	42002201	female	2001	Shaanxi Normal University	Sophomore	Humanities and SocialSciences	No	172	120	Rural	General health condition	0	0	30	7	0	5	20	60	1	1	1	1	2	0	7	7	0.714286	2	0	0	0	0	6	1	1	1	1	1	1	1	0	0	7	26	1
251	42002052	female	2001	Shaanxi Normal University	Sophomore	Humanities and SocialSciences	No	163	94	Urban	General health condition	23	0	30	6	30	7	20	47	1	1	1	1	1	23	6.5	7.5	0.933333	0	1	0	4	2	6	0	0	0	0	0	0	1	0	0	1	53	1
252	42002025	female	2001	Shaanxi Normal University	Sophomore	Humanities and SocialSciences	No	158	98	Rural	In good health	1	0	5	7	0	6	20	49	1	0	0	0	2	1	7	6	1	0	1	0	4	2	6	1	1	0	2	1	0	1	0	0	6	46	1
253	42002290	female	2001	Shaanxi Normal University	Sophomore	Humanities and SocialSciences	No	165	102	Urban	In good health	23	0	10	7	0	8	20	51	0	0	0	0	0	23	7	8	1	0	1	0	3	2	3	1	1	0	1	0	0	1	0	0	4	38	1
254	42011065	male	2001	Shaanxi Normal University	Sophomore	Humanities and SocialSciences	No	165	90	Urban	In good health	1	0	10	8	0	6	20	45	1	0	0	0	2	1	8	7	0.857143	0	0	0	6	3	6	1	1	0	1	3	1	3	3	0	13	59	1
255	420011098	female	2000	Shaanxi Normal University	Sophomore	Humanities and SocialSciences	No	160	100	Rural	General health condition	23	30	15	7	0	7	21	50	2	0	2	1	1	23.5	7	7.5	0.933333	0	1	0	3	2	7	1	1	1	1	2	1	1	1	1	10	48	1
256	420011049	female	2002	Shaanxi Normal University	Sophomore	Humanities and SocialSciences	No	155	100	Urban	General health condition	22	0	40	6	0	7	19	50	0	2	0	1	1	22	6	8	0.875	0	1	0	1	1	4	1	1	1	1	1	0	1	0	0	6	38	3
257	42013200	female	2001	Shaanxi Normal University	Sophomore	Humanities and SocialSciences	No	155	92	Urban	General health condition	22	0	10	5	30	5	20	46	2	0	0	0	2	22	5.5	7.5	0.666667	2	1	0	4	2	9	0	0	0	0	0	0	0	0	0	0	45	3
258	42011044	female	2002	Shaanxi Normal University	Sophomore	Humanities and SocialSciences	No	170	128	Urban	General health condition	0	0	30	7	0	6.5	19	64	1	1	3	2	1	0	7	7	0.928571	0	1	0	2	1	6	0	1	1	0	0	0	1	0	0	3	39	3
259	42011060	female	2001	Shaanxi Normal University	Sophomore	Humanities and SocialSciences	No	163	101	Urban	General health condition	23	0	20	6	0	5	20	50.5	0	1	1	1	2	23	6	7	0.714286	2	0	0	2	1	6	1	1	0	0	0	0	1	0	0	3	33	3
260	42013112	male	2002	Shaanxi Normal University	Sophomore	Humanities and SocialSciences	No	165	104	Rural	In good health	23	0	30	6	0	7	19	52	1	1	2	2	1	23	6	7	1	0	1	0	2	1	6	0	1	1	1	1	0	0	0	0	4	26	1
261	42011107	female	2002	Shaanxi Normal University	Sophomore	Humanities and SocialSciences	No	162	120	Urban	In good health	23	0	10	7	0	8	19	60	0	0	0	0	0	23	7	8	1	0	1	0	1	1	2	0	0	1	1	3	0	0	0	0	5	27	2
262	42011109	female	2001	Shaanxi Normal University	Sophomore	Humanities and SocialSciences	No	173	114	Rural	In good health	23	0	1	7	0	7	20	57	0	0	0	0	1	23	7	8	0.875	0	0	0	2	1	2	0	0	0	0	2	0	0	0	0	2	29	1
263	42013188	female	2002	Shaanxi Normal University	Sophomore	Humanities and SocialSciences	No	167	100	Urban	General health condition	0	0	20	7	0	7	19	50	1	1	1	1	1	0	7	7	1	0	1	0	4	2	6	0	1	1	0	0	0	0	0	0	2	28	3
264	42013198	female	2002	Shaanxi Normal University	Sophomore	Humanities and SocialSciences	No	160	110	Urban	General health condition	23	0	30	7	0	7	19	55	1	1	0	1	1	23	7	8	0.875	0	1	0	1	1	5	1	1	0	0	0	0	0	0	0	2	29	3
265	42011024	female	2002	Shaanxi Normal University	Freshman	Humanities and SocialSciences	No	160	100	Urban	General health condition	0	0	10	7	0	7	19	50	0	0	0	0	1	0	7	7	1	0	1	0	1	1	3	0	0	0	0	0	0	0	0	0	0	17	3
266	42013103	female	2002	Shaanxi Normal University	Sophomore	Humanities and SocialSciences	No	165	101	Urban	General health condition	0	0	30	7	0	6	19	50.5	2	1	2	2	2	0	7	7	0.857143	0	1	0	6	3	10	0	1	0	1	0	1	0	0	0	3	77	2
267	42013194	female	2002	Shaanxi Normal University	Sophomore	Humanities and SocialSciences	No	163	92	Urban	General health condition	23	0	20	7	0	7	19	46	2	1	2	2	1	23	7	8	0.875	0	2	0	6	3	10	1	0	1	1	1	0	0	0	0	4	31	3
268	42011074	female	2002	Shaanxi Normal University	Sophomore	Humanities and SocialSciences	No	165	124	Rural	In very good health	0	0	30	7	0	7	19	62	1	1	1	1	1	0	7	7	1	0	0	0	3	2	5	0	0	0	0	0	0	0	0	0	0	21	1
269	42011114	female	2002	Shaanxi Normal University	Sophomore	Humanities and SocialSciences	No	163	104	Rural	In good health	1	0	5	8	0	7	19	52	0	0	0	0	1	1	8	7	1	0	0	0	4	2	3	1	1	1	2	1	1	1	0	0	8		1
270	42011112	female	2002	Shaanxi Normal University	Sophomore	Humanities and SocialSciences	No	165	106	Urban	In good health	1	0	10	8	0	7	19	53	1	0	1	1	1	1	8	7	1	0	1	0	5	3	7	0	0	1	1	2	0	1	0	0	5	48	3
271	42011106	female	2002	Shaanxi Normal University	Sophomore	Humanities and SocialSciences	No	160	80	Urban	General health condition	0	0	15	7	0	7	19	40	1	0	0	0	1	0	7	7	1	0	0	0	2	1	3	0	0	0	0	0	1	0	0	0	1	37	3
272	42011067	female	2002	Shaanxi Normal University	Sophomore	Humanities and SocialSciences	No	167	98	Urban	In good health	1	0	5	7	30	5.5	19	49	0	0	0	0	2	1	7.5	6.5	0.846154	1	0	0	2	1	4	0	1	1	1	1	0	0	0	0	4	32	3
273	4611211	female	2002	Shaanxi Normal University	Sophomore	Humanities and SocialSciences	No	172	102	Urban	In very good health	23	0	5	7	0	7	19	51	0	0	0	0	1	23	7	8	0.875	0	0	0	0	0	1	0	0	0	0	0	0	0	0	0	0	17	3
274	42013174	female	2002	Shaanxi Normal University	Sophomore		No	164	150	Urban	In good health	22	30	20	6	30	6	19	75	2	1	1	1	2	22.5	6.5	8	0.75	1	2	0	4	2	10	0	0	0	0	1	0	1	0	0	2	35	1
275	42011096	female	2002	Shaanxi Normal University	Sophomore	Humanities and SocialSciences	No	163	92	Urban	In poor health	23	0	30	6	0	7	19	46	2	1	3	2	1	23	6	7	1	0	0	2	4	2	9	0	0	1	1	1	0	1	1	0	5	17	1
276	42011135	female	2000	Shaanxi Normal University	Sophomore	Humanities and SocialSciences	No	160	88	Urban	In good health	0	0	12	7	0	7	21	44	1	0	1	1	1	0	7	7	1	0	0	0	0	0	3	1	1	0	0	1	1	1	0	0	5	57	1
277	42011085	female	2001	Shaanxi Normal University	Sophomore	Humanities and SocialSciences	No	160	100	Urban	In good health	1	0	15	7	0	5	20	50	1	0	2	1	2	1	7	6	0.833333	1	1	0	0	0	6	0	0	0	0	0	0	0	0	0	0	27	1
278	42011097	female	2001	Shaanxi Normal University	Sophomore	Humanities and SocialSciences	No	168	117	Urban	General health condition	1	0	10	7	0	7	20	58.5	1	0	1	1	1	1	7	6	1.16667	0	1	0	4	2	6	1	1	1	1	1	0	1	1	0	7	33	1
279	42011076	female	2002	Shaanxi Normal University	Sophomore	Humanities and SocialSciences	No	164	106	Rural	General health condition	0	0	10	7	30	7.5	19	53	0	0	1	1	0	0	7.5	7.5	1	0	1	0	5	3	5	1	0	0	1	1	0	1	0	0	4	57	1
280	42011168	female	2002	Shaanxi Normal University	Sophomore	Humanities and SocialSciences	No	162	100	Rural	In good health	0	0	30	7	0	7	19	50	1	1	1	1	1	0	7	7	1	0	1	0	2	1	5	0	1	1	0	0	1	0	0	0	3	27	2
281	42011159	female	2001	Shaanxi Normal University	Sophomore	Humanities and SocialSciences	No	160	110	Urban	In good health	0	0	10	9	0	8	20	55	1	0	0	0	0	0	9	9	0.888889	0	1	0	1	1	3	0	0	0	0	0	0	0	0	0	0	39	1
282	42011163	female	2002	Shaanxi Normal University	Sophomore	Humanities and SocialSciences	No	161	90	Urban	In good health	23	0	5	6	30	8	19	45	0	0	0	0	0	23	6.5	7.5	1.06667	0	0	0	2	1	1	0	1	0	0	0	0	0	0	0	1	41	1
283	42011088	female	2002	Shaanxi Normal University	Sophomore	Humanities and SocialSciences	No	160	116	Rural	In good health	23	0	10	7	0	7	19	58	1	0	2	1	1	23	7	8	0.875	0	1	0	2	1	5	0	1	0	0	0	0	0	0	0	1	34	1
284	42011110	female	2002	Shaanxi Normal University	Sophomore	Humanities and SocialSciences	No	154	110	Rural	General health condition	23	0	10	9	0	9	19	55	0	0	0	0	0	23	9	10	0.9	0	0	0	2	1	1	1	0	0	1	1	0	1	0	0	4	34	1
285	42011128	female	2002	Shaanxi Normal University	Freshman	Humanities and SocialSciences	No	158	140	Urban	In good health	23	30	15	7	0	7	19	70	0	0	0	0	1	23.5	7	7.5	0.933333	0	1	2	0	0	4	0	0	0	0	0	0	0	0	0	0	25	3
286	4611208	female	2001	Shaanxi Normal University	Sophomore	Humanities and SocialSciences	No	165	108	Rural	In good health	0	0	10	6	0	7	20	54	1	0	0	0	1	0	6	6	1.16667	0	2	0	6	3	7	1	1	1	2	1	0	2	1	0	9	34	3
287	42011126	female	2002	Shaanxi Normal University	Sophomore	Humanities and SocialSciences	No	164	106	Rural	In good health	23	0	30	7	0	7	19	53	0	1	2	2	1	23	7	8	0.875	0	1	0	4	2	6	1	1	1	1	0	0	1	0	0	5	46	1
288	42011173	female	2002	Shaanxi Normal University	Sophomore	Humanities and SocialSciences	No	159	84	Rural	In good health	23	0	5	7	0	8	19	42	1	0	1	1	0	23	7	8	1	0	0	0	2	1	3	1	1	1	1	1	0	1	0	0	6	24	1
289	42011071	female	2002	Shaanxi Normal University	Sophomore	Humanities and SocialSciences	No	162	120	Rural	In poor health	0	0	30	7	0	6	19	60	1	1	1	1	2	0	7	7	0.857143	0	1	0	4	2	7	2	2	0	2	0	1	1	0	1	9	31	1
290	42011174	female	2001	Shaanxi Normal University	Sophomore	Humanities and SocialSciences	No	170	140	Urban	In good health	23	0	30	6	0	6	20	70	1	1	1	1	2	23	6	7	0.857143	0	1	0	6	3	8	1	1	1	1	1	1	1	0	0	7	54	2
291	42011145	female	2001	Shaanxi Normal University	Sophomore	Humanities and SocialSciences	No	165	100	Urban	In good health	23	0	15	7	0	7	20	50	1	0	1	1	1	23	7	8	0.875	0	1	0	3	2	6	1	0	0	1	0	0	0	0	0	2	32	3
292	42013170	female	2001	Shaanxi Normal University	Sophomore		No	157	90	Rural	General health condition	0	0	30	7	0	6	20	45	1	1	1	1	2	0	7	7	0.857143	0	1	0	0	0	5	1	1	0	1	2	1	1	2	1	10	64	3
293	42013175	female	2002	Shaanxi Normal University	Sophomore		No	160	104	Urban	General health condition	1	0	40	6	0	5	19	52	2	2	1	2	2	1	6	5	1	0	0	0	4	2	8	1	1	1	1	1	0	1	1	0	7	39	3
294	42013163	female	2002	Shaanxi Normal University	Sophomore		No	168	106	Urban	General health condition	23	0	30	7	0	6	19	53	2	1	2	2	2	23	7	8	0.75	1	1	1	6	3	12	1	1	1	1	1	1	1	1	1	9	51	2
295	42013166	female	2001	Shaanxi Normal University	Sophomore		No	158	88	Urban	General health condition	23	0	15	7	0	7	20	44	1	0	1	1	1	23	7	8	0.875	0	1	0	1	1	5	1	0	0	0	1	0	0	0	0	2	64	1
296	42013155	female	2002	Shaanxi Normal University	Sophomore		No	167	116	Urban	In good health	0	0	60	7	0	6	19	58		2	2	2	2	0	7	7	0.857143	0	1																3
297	42013161	female	2002	Shaanxi Normal University	Sophomore		No	164	80	Urban	General health condition	0	0	15	7	20	6	19	40	1	0	1	1	2	0	7.33333	7.33333	0.818182	1	1	0	5	3	9	0	0	0	1	1	0	0	0	0	2	64	1
298	42013172	female	2003	Shaanxi Normal University	Sophomore		No	168	90	Rural	In good health	0	0	30	7	0	5	18	45	2	1	1	1	2	0	7	7	0.714286	2	1	0	0	0	8	1	0	2	2	2	1	1	1	0	10	75	1
299	42013158	female	2002	Shaanxi Normal University	Sophomore		No	173	120	Urban	In good health	0	0	5	7	0	7	19	60	0	0	0	0	1	0	7	7	1	0	1	0	0	0	2	0	0	0	0	0	0	0	0	0	0	27	3
300	42013127	female	2004	Shaanxi Normal University	Sophomore	Humanities and SocialSciences	No	167	108	Urban	General health condition	23	0	30	7	0	8	17	54	1	1	2	2	0	23	7	8	1	0	1	0	2	1	5	1	1	0	1	0	1	1	0	0	5	43	1
301	42011092	female	2002	Shaanxi Normal University	Sophomore	Humanities and SocialSciences	No	165	105	Rural	General health condition	0	0	10	7	0	6	19	52.5	1	0	0	0	2	0	7	7	0.857143	0	1	0	4	2	6	1	1	2	2	1	1	2	1	0	11	52	1
302	42011093	female	2002	Shaanxi Normal University	Sophomore	Humanities and SocialSciences	No	165	102	Urban	General health condition	1	0	30	9	0	7	19	51	1	1	1	1	1	1	9	8	0.875	0	0	0	4	2	5	0	0	0	1	0	0	1	0	0	2	58	3
303	42013117	female	2002	Shaanxi Normal University	Sophomore	Humanities and SocialSciences	No	168	110	Urban	In good health	0	0	5	7	0	8	19	55	0	0	0	0	0	0	7	7	1.14286	0	0	0	3	2	2	3	1	0	2	3	1	0	0	0	10	42	1
304	42013092	female	2002	Shaanxi Normal University	Sophomore	Humanities and SocialSciences	No	166		Urban	In good health	23	30	40	6	30	7	19		0	2	0	1	1	23.5	6.5	7	1	0	1	0	0	0	3	1	0	0	1	1	0	1	0	0	4	21	3
305	42013094	female	2004	Shaanxi Normal University	Sophomore		No	162	90	Urban	In good health	22	0	30	6	0	7	17	45	1	1	1	1	1	22	6	8	0.875	0	2	0	4	2	7	1	1	1	2	2	0	1	2	0	10	19	3
306	42016075	female	2001	Shaanxi Normal University	Sophomore	Humanities and SocialSciences	No	155	115	Rural	General health condition	0	0	5	7	0	7	20	57.5	1	0	0	0	1	0	7	7	1	0	1	0	0	0	3	1	1	0	1	1	1	0	0	0	5	27	1
307	42016081	female	2001	Shaanxi Normal University	Sophomore	Humanities and SocialSciences	No	165	96	Rural	General health condition	0	0	10	7	0	6.5	20	48	1	0	1	1	1	0	7	7	0.928571	0	1	0	3	2	6	1	0	1	1	1	1	1	0	0	6	39	1
308	42016159	female	2001	Shaanxi Normal University	Sophomore	Humanities and SocialSciences	No	161	110	Rural	In good health	23	0	50	7	0	6	20	55	1	2	1	2	2	23	7	8	0.75	1	1	0	6	3	10	1	1	0	2	1	1	2	1	0	9	51	1
309	42016138	female	2001	Shaanxi Normal University	Sophomore	Humanities and SocialSciences	No	164	110	Urban	General health condition	23	0	30	7	0	7	20	55	2	1	3	2	1	23	7	8	0.875	0	1	0	2	1	7	1	1	1	1	0	1	1	1	0	7	49	1
310	42016079	female	2002	Shaanxi Normal University	Sophomore	Humanities and SocialSciences	No	160	82	Rural	General health condition	0	0	30	7	0	6	19	41	2	1	2	2	2	0	7	7	0.857143	0	1	0	4	2	9	1	1	1	1	1	1	1	1	0	8	44	1
311	42016076	female	2002	Shaanxi Normal University	Sophomore	Humanities and SocialSciences	No	163	124	Rural	In good health	23	50	10	7	15	7	19	62	1	0	1	1	1	23.8333	7.25	7.41667	0.94382	0	1	0	3	2	6	1	0	0	1	1	0	0	0	0	3	55	1
312	42016151	female	2002	Shaanxi Normal University	Sophomore	Humanities and SocialSciences	No	162	110	Rural	In good health	23	0	20	6	0	7	19	55	1	1	2	2	1	23	6	7	1	0	1	0	4	2	7	0	1	1	1	2	0	0	1	0	6	60	1
313	42016073	female	2000	Shaanxi Normal University	Sophomore	Humanities and SocialSciences	No	150	90	Rural	In good health	0	0	30	7	0	7	21	45	1	1	2	2	1	0	7	7	1	0	0	0	3	2	6	1	1	1	0	0	0	0	0	0	3	29	1
314	42016171	female	2002	Shaanxi Normal University	Sophomore	Humanities and SocialSciences	No	158	98	Rural	General health condition	23	0	15	7	0	7	19	49	1	0	1	1	1	23	7	8	0.875	0	1	0	2	1	5	1	1	0	1	1	1	1	1	0	7	43	1
315	42016014	female	2002	Shaanxi Normal University	Sophomore	Humanities and SocialSciences	No	151	86	Rural	General health condition	0	0	20	7	0	6.5	19	43	2	1	1	1	1	0	7	7	0.928571	0	1	0	4	2	7	1	1	1	1	1	1	1	1	0	8	45	1
316	42016024	female	2002	Shaanxi Normal University	Sophomore	Humanities and SocialSciences	No	152	86	Urban	General health condition	23	0	20	7	0	7	19	43	2	1	1	1	1	23	7	8	0.875	0	1	0	2	1	6	0	1	0	0	1	0	1	0	0	3	33	1
317	42016086	female	2001	Shaanxi Normal University	Sophomore	Humanities and SocialSciences	No	165	118	Rural	In good health	0	0	15	7	30	6	20	59	1	0	2	1	2	0	7.5	7.5	0.8	1	1	1	2	1	8	0	1	0	0	1	0	0	0	0	2	22	1
318	42016084	female	2002	Shaanxi Normal University	Sophomore	Humanities and SocialSciences	No	166	120	Rural	In good health	0	0	20	7	0	6	19	60	0	1	1	1	2	0	7	7	0.857143	0	1	0	2	1	5	0	0	0	1	0	0	0	0	0	1	29	1
319	42016096	female	2001	Shaanxi Normal University	Sophomore	Science	No	162	100	Rural	In good health	0	0	20	7	0	7	20	50	1	1	2	2	1	0	7	7	1	0	1	0	4	2	7	1	1	1	1	1	1	1	1	0	8	26	1
320	42016026	female	2001	Shaanxi Normal University	Sophomore	Humanities and SocialSciences	No	157	125	Rural	In good health	23	0	30	7	0	8	20	62.5	1	1	1	1	0	23	7	8	1	0	2	0	2	1	5	1	1	1	1	1	1	1	1	1	9	65	1
321	42016074	female	2001	Shaanxi Normal University	Sophomore	Humanities and SocialSciences	No	155	90	Rural	In good health	23	30	5	7	0	6	20	45	1	0	1	1	2	23.5	7	7.5	0.8	1	1	0	1	1	7	1	1	0	1	1	1	1	0	1	7	48	1
322	42016028	female	2001	Shaanxi Normal University	Sophomore	Humanities and SocialSciences	No	158	88	Rural	In good health	0	0	30	7	0	7	20	44	1	1	1	1	1	0	7	7	1	0	1	0	2	1	5	0	0	0	1	1	0	0	0	0	2	30	1
323	42016085	female	2002	Shaanxi Normal University	Sophomore	Science	No	165	120	Urban	In good health	0	0	5	7	30	9	19	60	0	0	0	0	0	0	7.5	7.5	1.2	0	0	0	0	0	0	0	0	0	0	0	0	0	0	0	0	53	1
324	42016070	female	2002	Shaanxi Normal University	Sophomore	Humanities and SocialSciences	No	165	115	Urban	In good health	0	0	10	7	0	7.5	19	57.5	1	0	0	0	0	0	7	7	1.07143	0	0	0	0	0	1	0	0	0	0	0	0	0	0	0	0	39	3
325	42016040	female	2003	Shaanxi Normal University	Sophomore	Humanities and SocialSciences	No	172	118	Rural	In poor health	0	0	10	7	0	6	18	59	1	0	0	0	2	0	7	7	0.857143	0	1	3	6	3	10	1	1	1	3	3	1	1	0	0	11	33	1
326	42012083	female	2001	Shaanxi Normal University	Freshman	Science	No	163	102	Urban	In good health	0	0	5	7	0	7	20	51	1	0	1	1	1	0	7	7	1	0	1	0	5	3	7	1	1	1	1	1	0	1	0	0	6	35	1
327	42012033	female	2001	Shaanxi Normal University	Sophomore	Science	No	160	94	Rural	In very good health	0	0	15	7	10	7	20	47	0	0	0	0	1	0	7.16667	7.16667	0.976744	0	0	0	2	1	2	1	0	0	1	1	0	1	0	0	4	39	1
328	42012204	female	2003	Shaanxi Normal University	Sophomore	Science	No	170	121	Urban	In good health	0	0	30	6	40	6	18	60.5	1	1	2	2	2	0	6.66667	6.66667	0.9	0	1	0	1	1	7	1	0	0	0	0	0	0	0	0	1	43	2
329	42012096	female	2002	Shaanxi Normal University	Sophomore	Science	No	161	130	Rural	In good health	0	0	5	7	0	7	19	65	0	0	0	0	1	0	7	7	1	0	1	0	0	0	2	1	0	0	0	0	0	0	0	0	1	49	1
330	42012143	female	2003	Shaanxi Normal University	Sophomore	Science	No	165	120	Rural	General health condition	23	0	30	7	0	8	18	60	1	1	2	2	0	23	7	8	1	0	1	0	3	2	6	1	1	1	1	1	1	1	0	1	8	30	2
331	42012036	female	2002	Shaanxi Normal University	Sophomore	Science	No	167	100	Urban	In good health	0	0	30	7	0	6	19	50	1	1	1	1	2	0	7	7	0.857143	0	1	0	0	0	5	0	0	1	0	0	0	1	0	0	2	26	1
332	42012048	female	2002	Shaanxi Normal University	Sophomore	Science	No	158	98	Rural	In very good health	23	0	5	7	0	7	19	49	0	0	0	0	1	23	7	8	0.875	0	0	0	1	1	2	0	0	0	0	0	0	0	0	0	0	31	1
333	42012249	female	2003	Shaanxi Normal University	Freshman	Science	No	163	100	Rural	General health condition	23	10	10	7	0	7	18	50	1	0	0	0	1	23.1667	7	7.83333	0.893617	0	1	1	4	2	6	1	1	0	1	1	0	1	1	0	6	43	1
334	42007016	male	2001	Shaanxi Normal University	Sophomore	Science	No	179	166	Rural	In good health	1	0	30	8	0	6	20	83	2	1	3	2	2	1	8	7	0.857143	0	1	0	1	1	8	1	1	0	1	0	0	2	2	0	7	49	1
335	42012050	female	2004	Shaanxi Normal University	Sophomore	Science	No	164	84	Rural	General health condition	23	0	30	7	0	7	17	42	1	1	2	2	1	23	7	8	0.875	0	1	0	3	2	7	1	0	1	1	1	0	1	0	0	5	27	2
336	42012078	female	2002	Shaanxi Normal University	Sophomore	Science	No	162	119	Urban	In good health	0	0	20	7	0	6	19	59.5	0	1	1	1	2	0	7	7	0.857143	0	1	0	5	3	7	0	0	1	1	2	0	1	1	0	6	43	2
337	42012023	female	2002	Shaanxi Normal University	Sophomore	Engineering	No	166	142	Urban	In very good health	23	0	15	6	0	7	19	71	1	0	1	1	1	23	6	7	1	0	1	0	0	0	4	0	0	0	0	2	0	0	0	0	2	33	2
338	42012044	female	2002	Shaanxi Normal University	Sophomore	Science	No	166	118	Urban	In good health	2	0	120	7	0	5	19	59	0	3	0	2	2	2	7	5	1	0	1	0	4	2	7	0	0	3	3	3	0	3	0	0	12	73	1
339	42012273	female	2001	Shaanxi Normal University	Sophomore	Engineering	No	158	100	Urban	General health condition	0	0	15	7	0	6.5	20	50	2	0	2	1	1	0	7	7	0.928571	0	1	0	4	2	7	1	0	2	1	0	0	0	0	0	4	28	1
340	42012096	female	2002	Shaanxi Normal University	Sophomore	Engineering	No	160	96	Urban	In good health	23	0	15	6	0	6	19	48	1	0	2	1	2	23	6	7	0.857143	0	2	0	4	2	8	1	2	1	1	1	2	1	1	2	12	18	1
341	42012201	female	2002	Shaanxi Normal University	Sophomore	Engineering	No	155	86	Urban	In good health	0	0	10	7	0	7	19	43	1	0	0	0	1	0	7	7	1	0	1	0	0	0	3	1	1	0	0	0	0	0	0	0	2	36	1
342	42012244	female	2002	Shaanxi Normal University	Sophomore	Science	No	157	96	Rural	In good health	23	0	10	7	0	7	19	48	1	0	2	1	1	23	7	8	0.875	0	1	0	2	1	5	1	0	0	1	1	0	1	1	0	5	28	1
343	42012105	female	2003	Shaanxi Normal University	Sophomore	Science	No	170	100	Rural	General health condition	23	0	60	6	50	7	18	50	1	2	3	3	1	23	6.83333	7.83333	0.893617	0	1	0	4	2	8	1	0	1	1	2	1	1	0	0	7	43	1
344	42012051	female	2002	Shaanxi Normal University	Sophomore	Engineering	No	160	95	Rural	In good health	0	0	5	7	0	7	19	47.5	0	0	0	0	1	0	7	7	1	0	1	0	3	2	4	1	0	0	1	2	0	1	0	0	5	41	3
345	42012027	female	2003	Shaanxi Normal University	Sophomore	Science	No	170	114	Urban	In good health	23	0	30	6	0	7	18	57	1	1	1	1	1	23	6	7	1	0	2	0	3	2	7	1	1	0	0	2	0	1	0	0	5	47	3
346	42012084	female	2002	Shaanxi Normal University	Sophomore	Engineering	No	160	84	Rural	In good health	0	0	30	6	0	6	19	42	0	1	1	1	2	0	6	6	1	0	1	0	4	2	6	0	1	0	1	1	0	0	0	0	3	47	1
347	42012194	female	2001	Shaanxi Normal University	Sophomore	Engineering	No	150	100	Rural	General health condition	23	45	15	6	45	6.5	20	50	1	0	2	1	1	23.75	6.75	7	0.928571	0	1	0	2	1	5	0	1	1	1	1	0	0	0	0	4	31	1
348	42012106	female	2002	Shaanxi Normal University	Sophomore	Engineering	No	162	114	Rural	In good health	23	50	30	6	55	6	19	57	0	1	1	1	2	23.8333	6.91667	7.08333	0.847059	1	1	0	1	1	6	0	0	1	1	0	0	0	0	0	2	26	1
349	42012130	male	2002	Shaanxi Normal University	Sophomore	Engineering	No	171	110	Rural	In good health	0	0	20	7	0	6	19	55	1	1	0	1	2	0	7	7	0.857143	0	1	0	4	2	7	1	0	1	0	0	0	0	0	0	2	38	1
350	42012108	female	2000	Shaanxi Normal University	Sophomore	Engineering	No	162	110	Rural	General health condition	0	0	10	7	0	8	21	55	1	0	0	0	0	0	7	7	1.14286	0	1	0	2	1	3	1	0	0	1	1	0	0	0	0	3		1
351	42012091	female	2002	Shaanxi Normal University	Sophomore	Engineering	No	150	84	Rural	General health condition	23	30	30	6	30	6.5	19	42	2	1	1	1	1	23.5	6.5	7	0.928571	0	1		6	3		1	1	2	2	1	1	1	0	0	9	45	1
352	42012186	female	2002	Shaanxi Normal University	Sophomore	Engineering	No	165	112	Urban	General health condition	0	0	10	7	0	6	19	56	1	0	1	1	2	0	7	7	0.857143	0	1	0	5	3	8	0	0	0	0	1	0	0	0	0	1	23	3
353	42012291	female	2002	Shaanxi Normal University	Sophomore	Engineering	No	163	85	Rural	General health condition	23	0	40	6	30	6	19	42.5	2	2	3	3	2	23	6.5	7.5	0.8	1	1	0	2	1	10	1	0	1	1	0	1	0	0	0	4	24	1
354	42012004	male	2002	Shaanxi Normal University	Sophomore	Science	No	173	106	Rural	In good health	23	0	10	7	0	7	19	53	0	0	0	0	1	23	7	8	0.875	0	1	0	3	2	4	1	1	1	1	0	1	0	0	0	5	42	1
355	42012238	female	2002	Shaanxi Normal University	Sophomore	Science	No	160	105	Urban	In good health	0	30	5	7	0	6	19	52.5	0	0	0	0	2	0.5	7	6.5	0.923077	0	0	0	0	0	2	1	0	0	0	0	1	0	0	0	2	49	1
356	42016215	female	2001	Shaanxi Normal University	Sophomore	Engineering	No	158	80	Rural	General health condition	0	0	20	7	10	7	20	40	1	1	2	2	1	0	7.16667	7.16667	0.976744	0	0	0	0	0	4	0	0	0	0	0	0	0	0	0	0	17	1
357	42012283	female	2002	Shaanxi Normal University	Sophomore	Science	No	163	96	Rural	In good health	0	0	5	7	30	8	19	48	1	0	0	0	0	0	7.5	7.5	1.06667	0	1	0	2	1	3	1	1	0	0	1	1	0	1	0	5	44	1
358	42012237	female	2002	Shaanxi Normal University	Sophomore	Science	No	173	104	Urban	In good health	0	0	30	7	0	6.5	19	52	1	1	2	2	1	0	7	7	0.928571	0	0	0	2	1	5	0	1	1	1	0	0	1	0	0	4	26	3
359	42012234	female	2002	Shaanxi Normal University	Sophomore	Engineering	No	159	100	Urban	General health condition	0	0	60	7	0	7	19	50	1	2	0	1	1	0	7	7	1	0	0	0	0	0	3	0	0	0	0	0	0	0	0	0	0	42	2
360	42012246	female	2003	Shaanxi Normal University	Sophomore	Science	No	161	107	Urban	In very good health	1	0	10	7	0	6	18	53.5	1	0	1	1	2	1	7	6	1	0	1	0	4	2	7	1	1	1	1	1	1	1	0	0	7	48	3
361	42012021	female	2001	Shaanxi Normal University	Sophomore	Science	No	170	130	Urban	General health condition	23	30	10	6	50	7	20	65	1	0	1	1	1	23.5	6.83333	7.33333	0.954545	0	0	0	3	2	5	0	0	1	1	1	0	0	0	0	3	47	2
362	42012100	female	2002	Shaanxi Normal University	Sophomore	Science	No	161	119	Urban	General health condition							19	59.5	1		2								1	0	2	1		1	0	1	0	1	1	1	0	0	5	39	1
363	42012243	female	2002	Shaanxi Normal University	Sophomore	Science	No	170	126	Rural	In very good health	23	0	10	7	0	7	19	63	0	0	0	0	1	23	7	8	0.875	0	1	0	1	1	3	0	0	0	0	0	0	0	0	0	0	23	1
364	42012043	female	2001	Shaanxi Normal University	Sophomore	Science	No	158	90	Rural	General health condition	23	0	10	7	0	7	20	45	1	0	1	1	1	23	7	8	0.875	0	1	0	2	1	5	1	1	1	1	1	0	1	0	0	6	32	1
365	42012183	female	2002	Shaanxi Normal University	Sophomore	Engineering	No	173	120	Urban	In good health	23	0	60	7	0	7	19	60	0	2	0	1	1	23	7	8	0.875	0	0	0	0	0	2	0	0	0	0	0	0	0	0	0	0	40	3
366	42004265	female	2001	Shaanxi Normal University	Sophomore	Humanities and SocialSciences	No	150	100	Rural	In very good health	0	0	20	7	0	6	20	50	0	1	1	1	2	0	7	7	0.857143	0	1	0	2	1	5	1	1	0	1	0	0	1	0	0	4	35	1
367	42002274	female	2002	Shaanxi Normal University	Sophomore	Humanities and SocialSciences	No	156	102	Rural	In good health	23	0	30	6	50	7	19	51	2	1	0	1	1	23	6.83333	7.83333	0.893617	0	2	0	5	3	9	1	0	2	2	1	1	1	0	1	9	52	1
368	42002051	female	2001	Shaanxi Normal University	Sophomore	Humanities and SocialSciences	No	168	130	Urban	General health condition	23	0	30	7	0	6	20	65	0	1	0	1	2	23	7	8	0.75	1	1	0	6	3	8	1	1	1	1	1	1	3	2	1	12	44	1
369	42002064	female	2002	Shaanxi Normal University	Sophomore	Humanities and SocialSciences	No	159	94	Urban	General health condition	23	0	15	7	0	7	19	47	2	0	0	0	1	23	7	8	0.875	0	1	0	2	1	5	1	1	1	1	0	1	1	0	0	6	69	2
370	42002079	female	2002	Shaanxi Normal University	Sophomore	Humanities and SocialSciences	No	168	128	Rural	In good health	0	0	10	7	0	7	19	64	1	0	1	1	1	0	7	7	1	0	1	0	1	1	5	0	0	0	0	0	0	0	0	0	0	25	1
371	42002027	female	2001	Shaanxi Normal University	Sophomore	Humanities and SocialSciences	No	150	88	Rural	In very good health	0	0	10	7	0	7	20	44	0	0	0	0	1	0	7	7	1	0	1	0	1	1	3	1	0	0	1	0	0	1	0	0	3	54	1
372	42002088	female	2002	Shaanxi Normal University	Sophomore	Humanities and SocialSciences	No	154	108	Rural	General health condition	23	0	60	7	0	7	19	54	2	2	3	3	1	23	7	8	0.875	0	1	0	4	2	9	1	0	2	1	0	0	1	0	0	5	55	1
373	42003120	female	2001	Shaanxi Normal University	Sophomore	Humanities and SocialSciences	No	157	114	Urban	General health condition	23	0	20	6	40	6.5	20	57	1	1	1	1	1	23	6.66667	7.66667	0.847826	1	0	0	1	1	5	1	1	0	1	1	0	0	0	0	4	19	1
374	42017148	female	2002	Shaanxi Normal University	Sophomore	Humanities and SocialSciences	No	168	118	Rural	General health condition	22	0	20	6	0	8	19	59	1	1	1	1	0	22	6	8	1	0	1	0	0	0	3	0	0	0	0	0	0	0	0	0	0	39	2
375	42002295	female	2002	Shaanxi Normal University	Sophomore	Humanities and SocialSciences	No	170	108	Rural	General health condition	23	0	30	7	0	6	19	54	2	1	3	2	2	23	7	8	0.75	1	2	0	4	2	11	1	1	1	1	0	0	0	0	0	4	38	1
376	42002150	female	2000	Shaanxi Normal University	Sophomore	Humanities and SocialSciences	No	161	100	Rural	General health condition	0	0	40	7	0	8	21	50	0	2	1	2	0	0	7	7	1.14286	0	0	0	2	1	3	1	0	0	0	1	0	0	0	0	2	20	1
377	42002096	female	2002	Shaanxi Normal University	Sophomore	Humanities and SocialSciences	No	160	120	Rural	In good health	0	0	20	7	0	6	19	60	1	1	0	1	2	0	7	7	0.857143	0	1	0	4	2	7	2	1	2	2	2	1	2	0	0	12	39	1
378	42002258	female	2002	Shaanxi Normal University	Sophomore	Humanities and SocialSciences	No	174	140	Urban	In good health	0	0	10	7	0	6	19	70	1	0	1	1	2	0	7	7	0.857143	0	1	0	3	2	7	0	0	1	1	0	0	0	0	0	2	17	3
379	42002268	female	2002	Shaanxi Normal University	Sophomore	Humanities and SocialSciences	No	157	112	Rural	General health condition	23	0	10	7	0	8	19	56	1	0	1	1	0	23	7	8	1	0	1	0	4	2	5	1	1	1	1	1	0	1	1	0	7	45	2
380	42002060	female	2001	Shaanxi Normal University	Sophomore	Humanities and SocialSciences	No	160	102	Rural	General health condition	23	0	60	7	0	6	20	51	2	2	3	3	2	23	7	8	0.75	1	1	0	3	2	11	1	0	2	1	2	1	2	0	0	9	47	1
381	42002047	female	2001	Shaanxi Normal University	Sophomore	Humanities and SocialSciences	No	160	121	Urban	In good health	0	0	15	7	0	7	20	60.5	1	0	1	1	1	0	7	7	1	0	1	0	5	3	7	3	2	1	3	2	2	0	0	0	13	43	3
382	42002038	female	2003	Shaanxi Normal University	Sophomore	Humanities and SocialSciences	No	159	96	Rural	General health condition	0	0	20	7	0	6	18	48	1	1	0	1	2	0	7	7	0.857143	0	1	0	2	1	6	1	0	0	1	1	0	1	0	0	4	27	1
383	42002085	female	2002	Shaanxi Normal University	Sophomore	Humanities and SocialSciences	No	163	106	Urban	General health condition	0	0	5	6	0	6	19	53	1	0	0	0	2	0	6	6	1	0	1	0	4	2	6	0	0	1	1	0	0	0	0	0	2	49	2
384	42002231	female	2002	Shaanxi Normal University	Sophomore	Humanities and SocialSciences	No	165	100	Rural	General health condition	0	0	5	7	0	6.5	19	50	1	0	1	1	1	0	7	7	0.928571	0	1	0	4	2	6	1	1	1	1	1	0	1	0	0	6	38	1
385	42002122	female	2002	Shaanxi Normal University	Sophomore	Humanities and SocialSciences	No	164	151	Urban	In good health	0	0	5	7	0	7	19	75.5	1	0	1	1	1	0	7	7	1	0	1	0	4	2	6	1	1	1	1	1	1	1	0	1	8	57	2
386	42002243	female	2002	Shaanxi Normal University	Sophomore	Humanities and SocialSciences	No	165	124	Rural	In good health	0	0	10	7	0	6	19	62	1	0	0	0	2	0	7	7	0.857143	0	1	0	1	1	5	0	0	0	0	1	1	1	0	0	3	46	1
387	42002275	female	2002	Shaanxi Normal University	Sophomore	Humanities and SocialSciences	No	160	98	Rural	In good health							19	49	2		1								2	0	6	3		2	2	2	2	2	2	2	2	2	18	47	1
388	42002181	female	2002	Shaanxi Normal University	Sophomore	Humanities and SocialSciences	No	158	118	Urban	General health condition	0	0	2	7	0	6	19	59	1	0	1	1	2	0	7	7	0.857143	0	1	0	3	2	7	1	0	1	1	1	1	1	0	0	6	53	2
389	42011113	female	2002	Shaanxi Normal University	Sophomore	Humanities and SocialSciences	No	170	101	Urban	General health condition	22	0	10	8	0	7	19	50.5	1	0	2	1	1	22	8	10	0.7	2	0	0	2	1	6	0	0	0	0	0	0	0	0	0	0	42	3
390	42011086	female	2001	Shaanxi Normal University	Sophomore	Humanities and SocialSciences	No	158	98	Rural	In good health	23	0	30	7	0	7	20	49	1	1	3	2	1	23	7	8	0.875	0	1	0	3	2	7	1	1	2	1	2	0	0	1	0	8	29	1
391	42011170	female	2002	Shaanxi Normal University	Sophomore	Humanities and SocialSciences	No	163	94	Urban	In poor health	23	0	30	8	0	7	19	47	2	1	1	1	1	23	8	9	0.777778	1	1	0	3	2	8	0	1	0	1	0	1	1	0	0	4	49	1
392	42011083	female	2002	Shaanxi Normal University	Sophomore	Humanities and SocialSciences	No	160	97	Urban	General health condition	0	0	20	7	0	7	19	48.5	1	1	2	2	1	0	7	7	1	0	1	0	6	3	8	1	1	1	1	2	1	2	0	1	10	46	3
393	42011150	female	2002	Shaanxi Normal University	Sophomore	Humanities and SocialSciences	No	174	136	Rural	In good health	0	0	20	7	0	7	19	68	0	1	0	1	1	0	7	7	1	0	1	0	5	3	6	1	0	1	1	0	0	2	1	0	6		1
394	42011047	female	2001	Shaanxi Normal University	Sophomore	Humanities and SocialSciences	No	165	120	Urban	General health condition	0	0	20	7	0	7	20	60	1	1	1	1	1	0	7	7	1	0	1	2	3	2	8	1	1	1	1	1	0	0	1	0	6	43	1
395	42011056	female	2002	Shaanxi Normal University	Sophomore	Humanities and SocialSciences	No	158	94	Urban	General health condition	0	0	10	7	0	7	19	47	1	0	1	1	1	0	7	7	1	0	1	0	4	2	6	0	0	0	0	0	0	0	0	0	0	43	1
396	42011087	female	2002	Shaanxi Normal University	Sophomore	Humanities and SocialSciences	No	158	118	Rural	General health condition	1	0	20	6	0	6	19	59	2	1	0	1	2	1	6	5	1.2	0	1	0	5	3	9	1	0	1	1	1	0	1	0	0	5	29	1
397	42011057	female	2002	Shaanxi Normal University	Sophomore	Humanities and SocialSciences	No	154	78	Rural	General health condition	23	0	30	7	0	6	19	39	1	1	0	1	2	23	7	8	0.75	1	1	0	5	3	9	1	0	2	1	1	1	1	0	0	7	39	1
398	42011184	female	2001	Shaanxi Normal University	Sophomore	Humanities and SocialSciences	No	173	144	Rural	General health condition	0	0	5	7	0	6	20	72	1	0	1	1	2	0	7	7	0.857143	0	1	0	4	2	7	1	1	1	1	1	1	1	1	1	9	35	1
399	42011053	female	2002	Shaanxi Normal University	Sophomore	Humanities and SocialSciences	No	158	108	Rural	In good health	23	0	5	7	0	6.5	19	54	1	0	1	1	1	23	7	8	0.8125	1	1	0	5	3	8	1	0	0	1	1	0	1	0	0	4	36	1
400	42011050	female	2002	Shaanxi Normal University	Sophomore	Humanities and SocialSciences	No	158	140	Urban	General health condition	23	0	3	8	0	9	19	70	0	0	0	0	0	23	8	9	1	0	1	0	6	3	4	1	1	1	1	1	0	1	0	0	6	48	2
401	42011045	female	2002	Shaanxi Normal University	Sophomore	Humanities and SocialSciences	No	161	94	Rural	In poor health	23	0	30	7	0	7	19	47	2	1	1	1	1	23	7	8	0.875	0	2	1	6	3	10	1	1	1	2	1	0	1	1	0	8	42	1
402	42011051	female	2002	Shaanxi Normal University	Sophomore	Humanities and SocialSciences	No	168	104	Rural	In good health	0	0	30	7	0	7	19	52	1	1	2	2	1	0	7	7	1	0	1	0	3	2	7	0	0	0	0	0	0	0	0	0	0	29	1
403	42035040	female	2001	Shaanxi Normal University	Sophomore	Humanities and SocialSciences	No	161	104	Urban	General health condition	23	0	10	7	0	8	20	52	2	0	0	0	0	23	7	8	1	0	1	0	4	2	5	1	1	0	1	0	0	1	1	0	5	51	2
404	42011180	female	2002	Shaanxi Normal University	Sophomore	Humanities and SocialSciences	No	160	100	Rural	General health condition	0	0	10	6	0	6	19	50	1	0	0	0	2	0	6	6	1	0	1	0	4	2	6	1	1	0	1	1	1	1	1	0	7	51	1
405	42011183	female	2002	Shaanxi Normal University	Sophomore	Humanities and SocialSciences	No	172	104	Urban	In good health	23	0	20	7	0	7	19	52	1	1	0	1	1	23	7	8	0.875	0	1	3	0	0	7	1	0	1	0	2	1	1	0	0	6	41	1
406	42011153	female	2003	Shaanxi Normal University	Sophomore	Humanities and SocialSciences	No	156	100	Rural	General health condition	23	0	15	7	0	7	18	50	1	0	1	1	1	23	7	8	0.875	0	1	1	2	1	6	0	0	1	1	1	0	0	0	0	3	37	2
407	42011043	female	2002	Shaanxi Normal University	Sophomore	Humanities and SocialSciences	No	167	110	Urban	General health condition	0	0	20	7	0	7	19	55	1	1	3	2	1	0	7	7	1	0	1	0	4	2	7	1	1	1	1	1	0	0	0	0	5	44	3
408	42011089	female	2002	Shaanxi Normal University	Sophomore	Humanities and SocialSciences	No	162	104	Urban	General health condition	0	0	50	9	0	6.5	19	52	1	2	1	2	1	0	9	9	0.722222	2	1	0	6	3	10	1	1	2	1	0	0	1	1	0	7	33	1
409	42011021	female	2002	Shaanxi Normal University	Sophomore	Humanities and SocialSciences	No	168	128	Urban	General health condition	0	0	30	7	0	7	19	64	1	1	1	1	1	0	7	7	1	0	1	0	4	2	6	1	0	1	1	2	0	1	1	0	7	58	2
410	420111046	female	2003	Shaanxi Normal University	Sophomore	Humanities and SocialSciences	No	171	102	Rural	In good health	22	0	3	6	30	7	18	51	0	0	0	0	1	22	6.5	8.5	0.823529	1	1	0	3	2	5	1	1	0	1	0	2	1	0	1	7	66	3
411	42011042	female	2002	Shaanxi Normal University	Sophomore	Humanities and SocialSciences	No	165	130	Rural	In good health	0	0	80	7	0	6	19	65	0	3	0	2	2	0	7	7	0.857143	0	1	0	4	2	7	1	1	0	1	0	0	0	0	0	3	22	1
412	42011032	female	2001	Shaanxi Normal University	Sophomore	Humanities and SocialSciences	No	160	123	Urban	General health condition	0	50	20	6	50	5	20	61.5	2	1	2	2	2	0.833333	6.83333	6	0.833333	1	2	0	5	3	12	0	1	2	2	1	1	1	1	1	10	41	2
413	211102141	male	2001	Tianshui Normal University	Freshman	Humanities and SocialSciences	Yes	180	150	Rural	General health condition	23	0	30	7	0	7	20	75	1	1	1	1	1	23	7	8	0.875	0	1	0	4	2	6	1	0	0	1	0	0	1	1	0	4	48	1
414	211102145	male	2001	Tianshui Normal University	Freshman	Humanities and SocialSciences	Yes	175	136	Rural	In good health	23	0	20	9	0	10	20	68	2	1	1	1	0	23	9	10	1	0	1	0	3	2	6	1	1	1	1	1	1	2	0	0	8	34	1
415	211102116	male	2001	Tianshui Normal University	Freshman	Humanities and SocialSciences	Yes	178	134	Rural	General health condition	0	0	30	7	0	6	20	67	1	1	2	2	2	0	7	7	0.857143	0	1	0	2	1	7	1	1	1	1	1	1	2	1	0	9	32	1
416	211102106	male	2001	Tianshui Normal University	Freshman	Humanities and SocialSciences	Yes	178	150	Rural	In very good health			20	6	0	7	20	75	0	1	0	1	1		6				1	0	0	0		0	0	0	0	0	0	0	0	0	0	31	1
417	211102142	male	2002	Tianshui Normal University	Freshman	Humanities and SocialSciences	Yes	174	128	Rural	In very good health	22	0	5	7	0	9	19	64	0	0	0	0	0	22	7	9	1	0	1	0	2	1	2	1	0	0	0	0	0	0	0	0	1	24	1
418	211102115	male	2003	Tianshui Normal University	Freshman	Humanities and SocialSciences	Yes	170	155	Rural	In good health	0	0	30	7	0	6	18	77.5	1	1	2	2	2	0	7	7	0.857143	0	1	0	0	0	6	0	0	0	0	0	0	0	0	0	0	22	1
419	211102128	male	2000	Tianshui Normal University	Freshman	Humanities and SocialSciences	Yes	181	140	Rural	In good health	23	0	30	6	0	6	21	70	1	1	3	2	2	23	6	7	0.857143	0	2	0	6	3	10	1	1	1	1	1	0	1	1	0	7	28	1
420	211102117	male	2003	Tianshui Normal University	Freshman	Humanities and SocialSciences	Yes	188	168	Rural	In very good health	0	0	15	7	0	6	18	84	1	0	1	1	2	0	7	7	0.857143	0	1	0	1	1	6	0	0	0	0	1	1	1	1	0	4	33	1
421	211102127	male	2002	Tianshui Normal University	Freshman	Humanities and SocialSciences	Yes	178	148	Rural	In good health	23	0	30	7	0	6	19	74	1	1	2	2	2	23	7	8	0.75	1	1	0	2	1	8	0	0	0	0	0	0	0	0	0	0	22	1
422	211102138	male	2003	Tianshui Normal University	Freshman	Humanities and SocialSciences	Yes	182	140	Rural	In good health	23	0	2	8	0	6	18	70	1	0	1	1	2	23	8	9	0.666667	2	2	0	1	1	9	1	0	1	2	1	0	1	2	0	8	33	1
423	200501101	male	2000	Tianshui Normal University	Sophomore	Humanities and SocialSciences	Yes	186	136	Rural	General health condition	0	0	30	7	0	6	21	68	1	1	1	1	2	0	7	7	0.857143	0	0	0	4	2	6	0	0	0	0	0	0	0	0	0	0	23	1
424	211102111	male	2000	Tianshui Normal University	Freshman	Humanities and SocialSciences	Yes	170	140	Rural	In good health	0	0	45	7	0	6	21	70	1	2	2	2	2	0	7	7	0.857143	0	1	0	0	0	6	1	0	1	0	0	1	1	0	0	4	23	1
425	211102120	male	2002	Tianshui Normal University	Freshman	Humanities and SocialSciences	Yes	180	135	Urban	In good health	23	0	20	7	0	8	19	67.5	0	1	0	1	0	23	7	8	1	0	0	0	1	1	2	0	1	0	0	0	0	0	0	0	1	42	1
426	211102105	male	2002	Tianshui Normal University	Freshman	Humanities and SocialSciences	Yes	190	140	Rural	In good health	23	0	10	7	0	8	19	70	1	0	0	0	0	23	7	8	1	0	0	0	4	2	3	1	1	1	1	1	1	1	1	0	8	43	1
427	211102114	male	2002	Tianshui Normal University	Freshman	Humanities and SocialSciences	Yes	180	136	Urban	In good health	0	0	20	7	0	7	19	68	1	1	1	1	1	0	7	7	1	0	1	0	3	2	6	1	1	1	1	2	2	2	0	0	10	41	1
428	211102113	male	2001	Tianshui Normal University	Freshman	Humanities and SocialSciences	Yes	180	140	Rural	In very good health	0	0	10	7	0	6	20	70	1	0	0	0	2	0	7	7	0.857143	0	0	0	1	1	4	0	0	0	0	0	0	0	0	0	0	17	1
429	211102134	female	2000	Tianshui Normal University	Freshman			172	115	Rural	In very good health	23	0	30	6	0	6	21	57.5	0	1	2	2	2	23	6	7	0.857143	0	1	0	3	2	7	0	0	1	1	0	1	2	1	0	6	43	1
430	211102131	female	1999	Tianshui Normal University	Freshman	Humanities and SocialSciences	Yes	168	114	Rural	In good health	22	0	10	7	0	9	22	57	1	0			0	22	7	9	1	0		0	2	1		1	0	1	1	1	1	1	1	0	7	28	1
431	211102135	male	2004	Tianshui Normal University	Freshman	Humanities and SocialSciences	Yes	170	118	Rural	In very good health	23	0	2	6	30	7	17	59	1	0	1	1	1	23	6.5	7.5	0.933333	0	1	0	0	0	4	0	0	0	0	0	0	0	0	0	0	28	1
432	211102144	male	2003	Tianshui Normal University	Freshman	Humanities and SocialSciences	Yes	176	118	Rural	In very good health	23	0	5	6	30	7	18	59	1	0	1	1	1	23	6.5	7.5	0.933333	0	1	0	0	0	4	0	0	0	0	0	0	0	0	0	0	39	1
433	211102103	female	2003	Tianshui Normal University	Freshman	Humanities and SocialSciences	Yes	163	90	Rural	In good health	23	0	15	7	0	8	18	45	1	0	1	1	0	23	7	8	1	0	1	0	2	1	4	0	0	0	1	1	0	0	1	0	3	29	1
434	211102133	male	2001	Tianshui Normal University	Freshman	Humanities and SocialSciences	Yes	183	138	Rural	In very good health	23	0	10	7	0	7	20	69	0	0	2	1	1	23	7	8	0.875	0	1	0	0	0	3	0	1	1	1	1	1	0	0	0	5	26	1
435	211102107	female	2002	Tianshui Normal University	Freshman		Yes	168	112	Rural	In good health	22	0	30	6	0	8	19	56	1	1	1	1	0	22	6	8	1	0	1	0	2	1	4	1	1	0	0	0	1	1	1	1	6	26	1
436	211102123	female	2004	Tianshui Normal University	Freshman	Humanities and SocialSciences	Yes	163	120	Rural	In very good health	23	0	20	7	0	8	17	60	1	1	1	1	0	23	7	8	1	0	1	0	2	1	4	0	0	1	1	1	1	0	0	0	4	25	1
437	211102124	male	2001	Tianshui Normal University	Freshman	Humanities and SocialSciences	Yes	178	160	Rural	In good health	23	0	10	7	0	8	20	80	1	0	1	1	0	23	7	8	1	0	1	0	2	1	4	0	0	0	0	1	1	0	0	0	2	21	1
438	211102125	male		Tianshui Normal University	Freshman	Humanities and SocialSciences	Yes	175	138	Rural	In very good health	0	0	30	8	0	6		69	1	1	2	2	2	0	8	8	0.75	1	1	0	1	1	8	1	1	1	1	1	1	1	1	0	8	17	1
439	211102149	male	2002	Tianshui Normal University	Freshman	Humanities and SocialSciences	Yes	183	176	Rural	In good health	23	0	30	7	0	8	19	88	1	1			0	23	7	8	1	0		0	0	0		1	1	0	1	2	1	1	0	0	7	37	1
440	211102122	female	2003	Tianshui Normal University	Freshman	Humanities and SocialSciences	Yes	167	120	Rural	In good health	23	0	30	6	0	6	18	60	1	1	1	1	2	23	6	7	0.857143	0	1	0	2	1	6	1	0	1	0	0	0	0	0	0	2	22	1
441	211102140	male	2001	Tianshui Normal University	Freshman	Humanities and SocialSciences	Yes	180	134	Rural	General health condition	23	0	20	7	0	10	20	67	1	1	2	2	0	23	7	8	1.25	0	1	0	2	1	5	1	0	1	1	0	0	1	0	0	4	32	1
442	211102110	male	2003	Tianshui Normal University	Freshman	Humanities and SocialSciences	Yes	180	150	Rural	In very good health	23	0	5	7	0	7	18	75	1	0	1	1	1	23	7	8	0.875	0	1	0	2	1	5	0	0	0	0	0	0	0	0	0	0	21	1
443	211102108	female	2003	Tianshui Normal University	Freshman	Humanities and SocialSciences	Yes	168	104	Urban	In very good health	23	0	30	7	0	6	18	52	1	1	3	2	2	23	7	8	0.75	1	1	0	2	1	8	0	0	0	0	0	1	1	1	1	4	35	1
444	211102130	male	2001	Tianshui Normal University	Freshman	Science	Yes	170	150	Rural	In good health	0	0	3	5	0	5	20	75	1	0	1	1	2	0	5	5	1	0	1	0	2	1	6	1	1	1	1	1	1	1	1	0	8	44	1
445	211102132	male	2002	Tianshui Normal University	Freshman	Humanities and SocialSciences	Yes	171	155	Rural	In very good health	23	0	10	6	30	6	19	77.5	0	0	0	0	2	23	6.5	7.5	0.8	1	0	0	0	0	3	0	0	0	0	0	0	0	0	0	0	36	1
446	21102119	male	2002	Tianshui Normal University	Freshman	Humanities and SocialSciences	Yes	183	162	Rural	In good health	23	0	30	9	0	10	19	81	0	1	0	1	0	23	9	10	1	0	1	0	1	1	3	0	0	1	1	1	0	1	0	0	4	54	1
447	211102136	male	2000	Tianshui Normal University	Freshman	Science	Yes	185	147	Rural	In very good health	23	0	5	7	0	7	21	73.5	0	0	0	0	1	23	7	8	0.875	0	0	0	0	0	1	0	0	0	0	0	0	0	0	0	0	17	1
448	211102121	male	2002	Tianshui Normal University	Freshman	Science	Yes	184	156	Rural	In good health	23	0	10	7	0	7	19	78	0	0	1	1	1	23	7	8	0.875	0	0	0	0	0	2	0	0	0	0	0	0	0	0	0	0	17	1
449	211102101	male	2002	Tianshui Normal University	Freshman	Science	Yes	183	132	Urban	In very good health	23	0	20	7	0	7	19	66	0	1	0	1	1	23	7	8	0.875	0	0	0	0	0	2	0	0	0	0	0	0	0	0	0	0	17	2
450	211102147	male	2000	Tianshui Normal University	Freshman	Humanities and SocialSciences	Yes	184	162	Rural	In very good health	0	0	10	6	0	7	21	81	0	0	0	0	1	0	6	6	1.16667	0	1	0	0	0	2	0	0	0	0	0	0	0	0	0	0	17	1
451		male	2001	Tianshui Normal University	Freshman	Humanities and SocialSciences	Yes	174	150	Rural	In very good health	20	0	300			8	20	75	0	3	1	2	0	20					1	0	1	1		1	0	0	1	2	3	0	0	0	7	49
452	211103101	male	1998	Tianshui Normal University	Freshman	Humanities and SocialSciences	Yes	175	130	Rural	In very good health	22	0	30	7	0	8	23	65	1	1	0	1	0	22	7	9	0.888889	0	1	0	1	1	4	0	0	0	0	0	0	0	0	0	0	31	1
453	211103102	male	2001	Tianshui Normal University	Freshman	Humanities and SocialSciences	Yes	170	150	Urban	In good health	0	0	30	8	0	7	20	75	1	1	1	1	1	0	8	8	0.875	0	1	0	3	2	6	1	1	1	1	1	1	2	1	0	9	42	1
454	211103105	female	2003	Tianshui Normal University	Freshman	Humanities and SocialSciences	Yes	162	103	Rural	In very good health	23	0	5	6	0	7	18	51.5	1	0	1	1	1	23	6	7	1	0	0	0	2	1	4	0	1	0	1	1	0	0	0	0	3	27	1
455	211101306	female	2002	Tianshui Normal University	Freshman	Humanities and SocialSciences	Yes	166	110	Rural	General health condition	22	0	20	7	0	8	19	55	0	1	1	1	0	22	7	9	0.888889	0	1	0	4	2	4	1	2	1	1	1	1	1	1	0	9	53	1
456	211103107	male	2000	Tianshui Normal University	Freshman	Humanities and SocialSciences	Yes	170	126	Rural	In very good health	23	0	10	7	0	7	21	63	1	0	0	0	1	23	7	8	0.875	0	1	0	0	0	3	0	0	0	0	0	1	0	0	0	1	25	1
457	211103108	female	2003	Tianshui Normal University	Freshman	Humanities and SocialSciences	Yes	168	165	Rural	In good health	2	0	60	9	0	3	18	82.5	3	2	3	3	3	2	9	7	0.428571	3	2	0	6	3	17	2	2	3	3	2	3	0	1	1	17	59	1
458	211103109	female	2002	Tianshui Normal University	Freshman	Humanities and SocialSciences	Yes	170	120	Rural	In good health	0	0	30	9	0	6	19	60	1	1	0	1	2	0	9	9	0.666667	2	1	0	2	1	8	1	1	1	0	0	0	0	0	0	3	32	1
459	211103110	female	2003	Tianshui Normal University	Freshman	Humanities and SocialSciences	Yes	170	116	Rural	In good health	23	0	10	7	0	5	18	58	1	0	0	0	2	23	7	8	0.625	3	1	0	3	2	9	1	1	1	1	1	1	1	0	0	7	40	1
460	20211103111	female	2003	Tianshui Normal University	Freshman	Humanities and SocialSciences	Yes	165	118	Rural	In good health	23	0	15	8	0	7	18	59	1	0	1	1	1	23	8	9	0.777778	1	1	0	1	1	6	1	1	1	1	0	0	1	0	0	5
461	211103112	male	2002	Tianshui Normal University	Freshman	Humanities and SocialSciences	Yes	182	158	Rural	General health condition	0	0	10	9	0	9	19	79	2	0	1	1	0	0	9	9	1	0	1	0	2	1	5	1	1	1	1	1	0	2	0	0	7	30	1
462	211103113	male	2003	Tianshui Normal University	Freshman	Humanities and SocialSciences	Yes	180	125	Rural	In very good health	22	0	12	6	0	6	18	62.5	1	0			2	22	6	8	0.75	1		1	2	1		1	0	0	1	2	0	0	0	0	4	18	1
463	211103115	female	2001	Tianshui Normal University	Freshman	Humanities and SocialSciences	Yes	158	94	Rural	In good health	23	0	30	7	0	7	20	47	0	1	1	1	1	23	7	8	0.875	0	0	0	1	1	3	0	0	0	0	0	0	0	0	0	0	20	1
464	211103116	male	2001	Tianshui Normal University	Freshman	Humanities and SocialSciences	Yes	180	140	Rural	In very good health	23	0	30	8	0	7	20	70	1	1	0	1	1	23	8	9	0.777778	1	1	0	5	3	8	1	1	0	1	1	0	2	0	0	6	44	2
465	211103117	female	2003	Tianshui Normal University	Freshman	Humanities and SocialSciences	Yes	164	124	Rural	In good health	23	0	30	8	0	7	18	62	1	1	2	2	1	23	8	9	0.777778	1	1	0	1	1	7	0	0	0	0	0	0	0	0	0	0	23	1
466	211103118	male	2003	Tianshui Normal University	Freshman	Humanities and SocialSciences	Yes	178	112	Urban	In good health	0	0	30	8	0	7	18	56	1	1	2	2	1	0	8	8	0.875	0	0	0	2	1	5	1	1	1	1	0	1	1	1	0	7	32	1
467	211103119	female	2000	Tianshui Normal University	Freshman	Humanities and SocialSciences	Yes	171	140	Rural	In very good health	23	0	5	6	30	7	21	70	0	0	0	0	1	23	6.5	7.5	0.933333	0	2	0	6	3	6	1	1	3	3	3	0	0	3	0	14	45	1
468	211103120	female	2003	Tianshui Normal University	Freshman	Humanities and SocialSciences	Yes	161	114	Rural	In very good health							18	57	2		0								0	0	0	0		0	0	0	0	0	0	0	0	0	0	17	1
469	211103121	male	2002	Tianshui Normal University	Freshman	Humanities and SocialSciences	Yes	182	148	Rural	In good health	23	0	20	7	0	7	19	74	1	1	1	1	1	23	7	8	0.875	0	1	0	3	2	6	0	1	1	1	1	1	1	0	0	6	43	1
470	211103122	female	2003	Tianshui Normal University	Freshman	Science	Yes	163	128	Urban	In good health	23	0	30	7	0	7	18	64	0	1	0	1	1	23	7	8	0.875	0	0	0	0	0	2	0	1	0	1	1	0	1	0	0	4	29	2
471	211103124	male	2002	Tianshui Normal University	Freshman	Humanities and SocialSciences	Yes	180	125	Urban	In very good health	0	0	1	6	0	5	19	62.5	2	0	3	2	2	0	6	6	0.833333	1	1	3	6	3	14	1	1	1	1	1	0	1	1	0	7	21	3
472	211103125	male	2001	Tianshui Normal University	Freshman	Humanities and SocialSciences	Yes	180	166	Rural	In good health	1	0	180	9	0	8	20	83	1	3	0	2	0	1	9	8	1	0		0	4	2		1	1	2	2	2	0	2	0	0	10	48	1
473	211103126	male	2002	Tianshui Normal University	Freshman	Humanities and SocialSciences	Yes	186	161	Rural	In good health	23	0	10	8	0	7	19	80.5	1	0	0	0	1	23	8	9	0.777778	1	1	0	3	2	6	0	0	0	1	0	0	1	0	0	2	43	1
474	211103127	male	2001	Tianshui Normal University	Freshman	Humanities and SocialSciences	Yes	185	158	Urban	In good health	0	0	10	8	0	7	20	79	1	0	1	1	1	0	8	8	0.875	0	1	0	4	2	6	1	1	1	1	1	1	0	0	0	6	28	1
475	211103128	male	2002	Tianshui Normal University	Freshman	Humanities and SocialSciences	Yes	188	164	Urban	In good health	23	0	60	7	0	8	19	82	1	2	1	2	0	23	7	8	1	0	1	0	1	1	5	1	1	1	1	1	0	0	0	0	5	29	2
476	211103129	female	2003	Tianshui Normal University	Freshman	Humanities and SocialSciences	Yes	166	110	Rural	In very good health	0	0	30	6	0	6	18	55	1	1	2	2	2	0	6	6	1	0	1	0	3	2	8	1	1	0	1	0	0	0	0	0	3	38	1
477	211103130	female	2003	Tianshui Normal University	Freshman	Humanities and SocialSciences	Yes	172	105	Rural	In good health	23	0	30	6	0	7	18	52.5	1	1	0	1	1	23	6	7	1	0	1	0	3	2	6	0	0	0	0	0	0	0	0	0	0	17	1
478	211103131	male	2003	Tianshui Normal University	Freshman	Humanities and SocialSciences	Yes	188	160	Rural	In very good health	23	0	10	6	30	7.5	18	80	0	0	2	1	0	23	6.5	7.5	1	0	1	0	1	1	3	0	0	0	0	0	0	0	0	0	0	17	1
479	211103132	female	2001	Tianshui Normal University	Freshman	Humanities and SocialSciences	Yes	164	90	Rural	In good health	23	0	30	6	0	7	20	45	1	1	0	1	1	23	6	7	1	0	1	0	1	1	5	0	1	0	0	0	0	0	0	0	1	17	1
480	211103133	female	2003	Tianshui Normal University	Freshman	Humanities and SocialSciences	Yes	160	84	Rural	In very good health	23	0	5	6	0	7	18	42	1	0	1	1	1	23	6	7	1	0	1	0	0	0	4	0	1	1	1	0	0	0	0	0	3	42	1
481	211103134	female	2003	Tianshui Normal University	Freshman	Humanities and SocialSciences	Yes	173	130	Urban	In very good health	0	0	30	6	0	7	18	65	0	1	0	1	1	0	6	6	1.16667	0	0	0	0	0	2	0	0	0	0	0	0	0	0	0	0	58	2
482	211103135	male	2002	Tianshui Normal University	Freshman	Science	Yes	185	135	Urban	General health condition							19	67.5	2		0									0	2	1		0	0	1	1	1	0	0	0	0	3	38	3
483	211103136	female	2000	Tianshui Normal University	Freshman	Humanities and SocialSciences	Yes	174	120	Rural	In good health	23	0	30	6	0	7	21	60	1	1	1	1	1	23	6	7	1	0	1	0	1	1	5	0	0	0	1	0	0	0	0	0	1	18	1
484	211103137	female	2003	Tianshui Normal University	Freshman	Humanities and SocialSciences	Yes	158	105	Urban	In good health	0	0	30	7	0	6	18	52.5	3	1	3	2	2	0	7	7	0.857143	0	2	0	6	3	12	2	1	2	3	3	1	1	0	1	14	65	1
485	211103138	female	2003	Tianshui Normal University	Freshman	Humanities and SocialSciences	Yes	165	120	Urban	In good health	23	0	50	6	0	7	18	60	2	2	3	3	1	23	6	7	1	0		0	4	2		1	0	3	1	0	0	0	1	0	6	43	1
486	211103139	male	2002	Tianshui Normal University	Freshman	Humanities and SocialSciences	Yes	170	130	Rural	In good health	23	0	30	6	0	7	19	65	2	1	1	1	1	23	6	7	1	0	1	0	5	3	8	1	0	0	1	0	0	0	0	0	2	20	1
487	211103140	female	2002	Tianshui Normal University	Freshman	Humanities and SocialSciences	Yes	170	116	Rural	In good health	0	0	10	8	0	7	19	58	1	0	0	0	1	0	8	8	0.875	0	1	0	2	1	4	1	0	0	1	1	1	1	0	0	5	37	1
488	211103141	female	2002	Tianshui Normal University	Freshman	Humanities and SocialSciences	No	164	125	Rural	In very good health	23	0	15	6	0	7	19	62.5	0	0	0	0	1	23	6	7	1	0	1	0	3	2	4	1	1	0	1	1	0	1	0	1	6	35	1
489	211103142	male	2003	Tianshui Normal University	Freshman	Humanities and SocialSciences	Yes	180	120	Urban	In good health	0	0	20	8	0	7	18	60	1	1	0	1	1	0	8	8	0.875	0	1	0	2	1	5	0	0	0	0	0	0	1	0	0	1	29	1
490	211103143	male	2003	Tianshui Normal University	Freshman	Humanities and SocialSciences	Yes	170	160	Urban	General health condition	23	0	30	6	0	6	18	80	1	1	2	2	2	23	6	7	0.857143	0	1	0	0	0	6	0	0	1	1	1	1	1	1	0	6	49	1
491	211103144	female	2003	Tianshui Normal University	Freshman	Humanities and SocialSciences	Yes	167	164	Urban	In very good health	23	0	30	7	0	6	18	82	0	1	1	1	2	23	7	8	0.75	1	1	0	3	2	7	1	2	1	2	0	0	2	3	0	11	63	1
492	211103148	female	2001	Tianshui Normal University	Freshman	Humanities and SocialSciences	Yes	164	114	Rural	In good health	0	0	40	7	0	6	20	57	2	2	3	3	2	0	7	7	0.857143	0	3	1	4	2	13	1	1	1	1	2	1	1	0	0	8	36	1
493	211103149	female	2001	Tianshui Normal University	Freshman	Humanities and SocialSciences	Yes	172	118	Rural	General health condition	21	0	30	8	0	8	20	59	1	1	1	1	0	21	8	11	0.727273	2	1	0	3	2	7	0	2	1	1	2	2	1	1	0	10	32	1
494	211103150	male	2001	Tianshui Normal University	Freshman	Humanities and SocialSciences	Yes	184	152	Rural	In very good health	23	0	20	8	0	7	20	76	0	1	0	1	1	23	8	9	0.777778	1	0	0	0	0	3	0	0	1	0	0	0	1	0	0	2	20	1
495	211103151	male	2003	Tianshui Normal University	Freshman	Humanities and SocialSciences	Yes	178	140	Urban	General health condition	0	0	10	7	0	6	18	70	1	0	3	2	2	0	7	7	0.857143	0	1	0	4	2	8	1	1	1	1	1	1	1	1	0	8	40	1
496	211103152	male	2001	Tianshui Normal University	Freshman	Humanities and SocialSciences	Yes	182	140	Rural	In good health	1	0	5	7	0	6	20	70	0	0	0	0	2	1	7	6	1	0	1	0	3	2	5	1	1	2	1	2	1	1	1	0	10	46	1
497	211103153	male	2002	Tianshui Normal University	Freshman	Humanities and SocialSciences	Yes	175	108	Urban	In good health	23	0	20	7	0	7.5	19	54	1	1	2	2	0	23	7	8	0.9375	0	1	0	3	2	6	1	1	2	1	1	3	2	2	1	14	47	1
498	211103155	male	2002	Tianshui Normal University	Freshman	Humanities and SocialSciences	Yes	181	220	Urban	In good health	23	0	5	6	0	7	19	110	0	0	0	0	1	23	6	7	1	0	0	0	1	1	2	0	0	0	2	0	0	0	0	0	2	23	1
499	211103154	male	2001	Tianshui Normal University	Freshman	Humanities and SocialSciences	Yes	179	144	Rural	In good health	23	0	60	6	0	6	20	72	2	2	0	1	2	23	6	7	0.857143	0	1	0	5	3	9	0	1	1	1	1	0	1	2	0	7	56	1
500	211103156	female	2000	Tianshui Normal University	Freshman	Humanities and SocialSciences	Yes	165	110	Rural	In good health	23	0	40	7	0	7	21	55	2	2	2	2	1	23	7	8	0.875	0	1	0	2	1	7	1	1	1	1	0	1	1	1	0	7	48	1
501	211103157	male	2002	Tianshui Normal University	Freshman	Humanities and SocialSciences	Yes	185	160	Rural	In very good health	18	0	10	5	0	7	19	80	0	0	0	0	1	18	5	11	0.636364	3	1	0	2	1	6	0	0	0	1	1	0	1	1	0	4	21	1
502	211103158	male	2002	Tianshui Normal University	Freshman	Humanities and SocialSciences	Yes	174	110	Rural	In very good health	23	0	10	6	0	7	19	55	1	0	2	1	1	23	6	7	1	0	1	0	2	1	5	0	0	0	0	1	0	0	0	0	1	26	1
503	211103159	male	2003	Tianshui Normal University	Freshman	Humanities and SocialSciences	Yes	178	200	Urban	In good health	0	0	15	7	0	8	18	100	0	0	0	0	0	0	7	7	1.14286	0	1	0	0	0	1	1	1	0	1	1	1	0	0	0	5	30	1
504	211103160	male	2002	Tianshui Normal University	Freshman	Humanities and SocialSciences	Yes	176	132	Urban	In good health	22	30	20	7	0	9	19	66	1	1	1	1	0	22.5	7	8.5	1.05882	0	0	0	2	1	3	1	1	0	0	0	0	0	0	0	2	25	1
505	4119110006	female	1994	Xi’an Jiaotong University	PhD Candidate	Humanities and SocialSciences	No	160	106	Urban	General health condition	23	30	15	8	0	8	27	53	1	0	1	1	0	23.5	8	8.5	0.941176	0	1	0	4	2	5	1	1	1	1	1	0	0	0	0	5	39	1
506	4118010003	female	1994	Xi’an Jiaotong University	PhD Candidate	Humanities and SocialSciences	No	158	105	Urban	General health condition	0	0	60	9	0	8	27	52.5	2	2	2	2	0	0	9	9	0.888889	0	1	0	6	3	8	1	0	2	3	1	0	2	0	0	9	40	2
507	2192110791	male	2001	Xi’an Jiaotong University	Junior	Humanities and SocialSciences	No	190	187	Urban	In good health	2	0	30	7	0	4	20	93.5	1	1	1	1	3	2	7	5	0.8	1	1	0	0	0	7	0	0	0	1	3	0	1	1	0	6	21	1
508	2194420644	female	2001	Xi’an Jiaotong University	Junior	Humanities and SocialSciences	No	163	115	Urban	In good health	0	0	3	9	0	9	20	57.5	0	0	0	0	0	0	9	9	1	0	0	0	4	2	2	0	1	0	1	1	1	1	0	0	5	32	1
509	2191420600	female	2001	Xi’an Jiaotong University	Junior	Humanities and SocialSciences	No	168	100	Rural	In good health	2	0	5	10	0	8	20	50	0	0	1	1	0	2	10	8	1	0	0	0	4	2	3	0	0	0	1	1	0	0	0	0	2	41	3
510	2196123282	female	2001	Xi’an Jiaotong University	Junior	Humanities and SocialSciences	No	173	120	Urban	General health condition	1	0	10	9	0	8	20	60	1	0	1	1	0	1	9	8	1	0	1	0	4	2	5	1	0	1	1	1	1	1	0	0	6	33	3
511	2194321014	female	2001	Xi’an Jiaotong University	Junior	Humanities and SocialSciences	No	150	79	Rural	In good health	1	0	0	10	0	9	20	39.5	1	0	0	0	0	1	10	9	1	0	1	0	2	1	3	1	0	2	0	1	0	0	0	0	4	30	1
512	2196113292	male	2000	Xi’an Jiaotong University	Junior	Humanities and SocialSciences	No	185	190	Urban	In good health	1	0	30	8	30	7	21	95	1	1	3	2	1	1	8.5	7.5	0.933333	0	2	0	4	2	8	1	1	1	1	1	1	1	0	0	7	54	2
513	2196123310	female	2000	Xi’an Jiaotong University	Junior	Humanities and SocialSciences	No	165	117	Urban	General health condition	1	0	180	10	0	6	21	58.5	2	3	3	3	2	1	10	9	0.666667	2	2	3	6	3	17	3	3	3	3	1	3	3	3	3	25	65	3
514	2196123272	female	2001	Xi’an Jiaotong University	Junior	Humanities and SocialSciences	No	162	124	Urban	General health condition	0	0	30	7	30	6	20	62	2	1	2	2	2	0	7.5	7.5	0.8	1	2	1	6	3	13	1	2	3	3	3	1	3	1	0	17	74	3
515	2194110347	male	2000	Xi’an Jiaotong University	Junior	Humanities and SocialSciences	No	173	110	Urban	In good health	23	30	20	9	0	8	21	55	1	1	2	2	0	23.5	9	9.5	0.842105	1	1	0	6	3	8	1	0	1	1	1	0	1	0	0	5	27	1
516	2192110794	male	2001	Xi’an Jiaotong University	Junior	Humanities and SocialSciences	No	181	159	Urban	General health condition	0	0	15	7	0	7	20	79.5	2	0	2	1	1	0	7	7	1	0	1	0	3	2	7	1	1	1	1	0	1	1	0	0	6	52	1
517	2196112896	male	1999	Xi’an Jiaotong University	Junior	Humanities and SocialSciences	No	178	164	Rural	General health condition	0	0	60	7	30	7	22	82	1	2	1	2	1	0	7.5	7.5	0.933333	0	1	0	5	3	8	1	0	0	1	1	0	1	0	0	4	42	1
518	2196113251	male	2001	Xi’an Jiaotong University	Junior	Humanities and SocialSciences	No	178	145	Urban	General health condition	0	0	30	7	0	7	20	72.5	2	1	3	2	1	0	7	7	1	0	1	0	6	3	9	0	0	0	1	0	0	1	0	0	2	33	1
519	2193622833	female	2001	Xi’an Jiaotong University	Junior	Humanities and SocialSciences	No	172	102	Rural	General health condition	0	0	30	7	30	7	20	51	2	1	3	2	1	0	7.5	7.5	0.933333	0	2	0	6	3	10	1	1	2	1	1	0	1	0	0	7	49	1
520		male	1999	Xi’an Jiaotong University	Junior	Humanities and SocialSciences	No	172	140	Rural	In good health	0	0	20	9	0	9	22	70	1	1	0	1	0	0	9	9	1	0	0	0	0	0	2	1	0	0	0	1	1	1	1	0	5	36	1
521	2195310734	male	2000	Xi’an Jiaotong University	Junior	Humanities and SocialSciences	No	172	122	Rural	In good health	0	0	15	8	0	6.5	21	61	1	0	1	1	1	0	8	8	0.8125	1	1	0	4	2	7	1	0	2	1	2	0	0	1	0	7	62	1
522	2195120250	female	2000	Xi’an Jiaotong University	Senior	Humanities and SocialSciences	No	160	100	Urban	General health condition	0	0	30	9	0	8	21	50	2	1	2	2	0	0	9	9	0.888889	0	1	0	4	2	7	1	1	1	1	1	1	1	1	0	8	51	1
523	2195120255	female	2001	Xi’an Jiaotong University	Junior	Humanities and SocialSciences	No	164	104	Rural	General health condition	23	0	60	9	0	7.5	20	52	1	2	0	1	0	23	9	10	0.75	1	1	0	3	2	6	1	1	1	1	1	0	2	0	0	7	45	1
524	2195120253	female	2000	Xi’an Jiaotong University	Junior	Humanities and SocialSciences	No	165	98	Urban	In good health	23	0	20	8	0	8	21	49	1	1	1	1	0	23	8	9	0.888889	0	0	0	3	2	4	0	0	0	1	1	0	1	0	0	3	52	1
525	2196113263	male	2001	Xi’an Jiaotong University	Junior	Humanities and SocialSciences	No	175	130	Urban	In good health	0	0	30	8	0	7	20	65	0	1	0	1	1	0	8	8	0.875	0	1	0	2	1	4	0	0	0	0	0	0	0	0	0	0	33	3
526	2194420643	female	2001	Xi’an Jiaotong University	Junior	Humanities and SocialSciences	No	164	105	Urban	General health condition	23	0	15	8	0	7	20	52.5	1	0	0	0	1	23	8	9	0.777778	1	1	0	6	3	7	1	1	0	1	1	0	1	0	0	5	43	3
527	2192220062	female	2001	Xi’an Jiaotong University	Junior	Humanities and SocialSciences	No	161	112	Urban	In good health	0	0	1	9	0	8	20	56	0	0	0	0	0	0	9	9	0.888889	0	1	0	2	1	2	1	1	0	1	1	1	0	1	1	7	31	3
528	2193520409	female	2001	Xi’an Jiaotong University	Junior	Humanities and SocialSciences	No	165	130	Rural	In good health	1	0	60	9	0	6	20	65	1	2	2	2	2	1	9	8	0.75	1	1	0	4	2	9	1	1	1	1	2	1	1	1	1	10	58	1
529	2196220754	female	2000	Xi’an Jiaotong University	Junior	Humanities and SocialSciences	No	154	80	Rural	In good health	23	0	60	9	0	9	21	40	1	2	3	3	0	23	9	10	0.9	0	1	0	3	2	7	1	1	2	0	2	0	1	1	0	8	44	1
530	2196113241	male	2001	Xi’an Jiaotong University	Junior	Humanities and SocialSciences	No	173	128	Rural	In good health	23	30	5	7	0	7	20	64	0	0	0	0	1	23.5	7	7.5	0.933333	0	1	0	2	1	3	0	0	0	0	1	0	0	0	0	1	31	1
531	2194120348	female	2000	Xi’an Jiaotong University	Junior	Humanities and SocialSciences	No	177	110	Rural	General health condition	0	0	30	8	0	7	21	55	1	1	2	2	1	0	8	8	0.875	0	1	2	3	2	9	1	1	1	1	1	0	1	0	0	6	37	1
532	2191420602	female	2001	Xi’an Jiaotong University	Junior	Humanities and SocialSciences	No	158	98	Rural	In poor health	0	0	60	10	0	10	20	49	2	2	3	3	0	0	10	10	1	0	2	0	0	0	7	1	1	2	1	1	1	1	0	0	8	36	1
533	2160506001	female	2001	Xi’an Jiaotong University	Junior	Humanities and SocialSciences	No	170	120	Urban	In good health	23	0	10	6	0	7	20	60	1	0	1	1	1	23	6	7	1	0	1	3	2	1	8	0	0	1	0	2	3	1	0	1	8	24	3
534	2193612835	male	2001	Xi’an Jiaotong University	Junior	Humanities and SocialSciences	No	178	125	Urban	In very good health	1	0	15	7	0	6	20	62.5	1	0	2	1	2	1	7	6	1	0	1	0	1	1	6	3	3	0	1	0	0	1	0	0	8	37	2
535	2196123254	female	2001	Xi’an Jiaotong University	Junior	Humanities and SocialSciences	No	173	120	Urban	In good health	1	0	5	8	0	7	20	60	0	0	1	1	1	1	8	7	1	0	1	0	2	1	4	0	0	0	1	0	0	0	0	0	1	39	3
536		female	2001	Xi’an Jiaotong University	Junior	Humanities and SocialSciences	No	165	110	Urban	General health condition	5	0	60	12	0	6	20	55	2	2	3	3	2	5	12	7	0.857143	0	1	0	5	3	11	1	2	3	2	2	2	2	1	2	17	57	3
537	2194313109	male	2001	Xi’an Jiaotong University	Junior	Humanities and SocialSciences	No	172	112	Urban	In good health	23	0	30	9	0	8	20	56	0	1	0	1	0	23	9	10	0.8	1	1	0	6	3	6	1	1	0	1	0	0	1	0	0	4	54	1
538	2192320038	female	2001	Xi’an Jiaotong University	Junior	Humanities and SocialSciences	No	166	130	Urban	In good health	0	0	5	9	0	10	20	65	0	0	0	0	0	0	9	9	1.11111	0	1	0	1	1	2	1	0	0	0	0	1	0	0	0	2	39	3
539	2193710577	male	2000	Xi’an Jiaotong University	Junior	Humanities and SocialSciences	No	171	136	Urban	In good health	0	0	30	7	40	7	21	68	1	1	1	1	1	0	7.66667	7.66667	0.913043	0	1	0	2	1	5	0	0	0	1	1	0	0	0	0	2	47	3
540	211302106	female	2003	Tianshui Normal University	Freshman		No	160	97	Rural	In good health	22	0	30	8	0	7	18	48.5	2	1	2	2	1	22	8	10	0.7	2	2	0	4	2	11	0	0	1	2	0	0	2	0	0	5	33	1
541	211302111	female	2001	Tianshui Normal University	Freshman	Humanities and SocialSciences	No	162	108	Rural	In very good health	23	0	10	7	0	8	20	54	1	0	0	0	0	23	7	8	1	0	1	0	2	1	3	0	1	0	1	0	0	1	0	0	3	35	1
542	211302102	female	2004	Tianshui Normal University	Freshman	Science	No	168	150	Rural	General health condition	22	0	10	6	0	8	17	75	1	0	0	0	0	22	6	8	1	0	2	0	3	2	5	1	1	2	1	3	0	1	0	0	9	68	1
543	211302113	female	2001	Tianshui Normal University	Freshman	Humanities and SocialSciences	No	164	130	Rural	In good health	23	0	20	6	30	7	20	65	2	1	1	1	1	23	6.5	7.5	0.933333	0	1	0	5	3	8	0	0	1	1	1	0	1	0	0	4	36	1
544	211302112	female	2002	Tianshui Normal University	Freshman	Humanities and SocialSciences	No	166	120	Urban	In good health	23	0	10	6	50	7	19	60	1	0	1	1	1	23	6.83333	7.83333	0.893617	0	0	0	1	1	4	1	1	0	0	1	1	1	0	1	6	29	1
545	211301330	male	2003	Tianshui Normal University	Freshman		No	170	114	Rural	In poor health	23	0	30	7	0	6	18	57	1	1	1	1	2	23	7	8	0.75	1	1	0	2	1	7	1	1	0	1	0	1	2	1	1	8	38	1
546	211301307	male	2003	Tianshui Normal University	Freshman	Humanities and SocialSciences	No	170	125	Rural	In good health	0	0	5	6	0	5	18	62.5	1	0	1	1	2	0	6	6	0.833333	1	1	0	2	1	7	0	0	1	1	1	2	1	1	0	7	39	1
547	211301315	male	2003	Tianshui Normal University	Freshman	Humanities and SocialSciences	No	175	120	Rural	General health condition	0	0	20	6	0	6	18	60	1	1	1	1	2	0	6	6	1	0	1	0	3	2	7	0	0	0	1	1	0	1	1	0	4	40	1
548	210107157	male	2001	Tianshui Normal University	Freshman	Humanities and SocialSciences	No	175	120	Rural	General health condition	23	0	10	7	0	8	20	60	1	0	0	0	0	23	7	8	1	0	1	0	3	2	4	0	1	1	1	0	1	0	0	0	4	41	1
549	211301318	female	2003	Tianshui Normal University	Freshman	Humanities and SocialSciences	No	155	95	Rural	General health condition	23	0	30	8	0	8	18	47.5	2	1	3	2	0	23	8	9	0.888889	0	1	0	6	3	8	1	1	1	1	1	1	3	3	1	13	70	1
550	211302121	male	2002	Tianshui Normal University	Freshman	Humanities and SocialSciences	No	178	146	Rural	In very good health	23	0	30	7	0	7	19	73	2	1	2	2	1	23	7	8	0.875	0	1	0	4	2	8	1	1	1	1	0	1	1	1	0	7	43	1
551	211302119	male	2001	Tianshui Normal University	Freshman	Humanities and SocialSciences	No	188	126	Rural	In good health	0	0	10	6	30	5	20	63	0	0	1	1	2	0	6.5	6.5	0.769231	1	1	0	2	1	6	0	1	0	1	0	0	0	0	0	2	25	2
552	211301323	female	2001	Tianshui Normal University	Freshman	Engineering	No	155	99	Rural	In good health	23	0	10	8	0	7	20	49.5	1	0	1	1	1	23	8	9	0.777778	1	1	0	4	2	7	0	0	0	1	0	0	1	0	0	2	34	1
553	211301306	female	2003	Tianshui Normal University	Freshman	Humanities and SocialSciences	No	154	90	Rural	General health condition	23	30	16	6	30	7	18	45	1	1	1	1	1	23.5	6.5	7	1	0	1	0	3	2	6	1	1	0	1	1	2	3	1	0	10	35	1
554	211301319	female	2003	Tianshui Normal University	Freshman	Humanities and SocialSciences	No	165	126	Rural	In good health	23	0	20	6	0	7	18	63	1	1	0	1	1	23	6	7	1	0	1	0	3	2	6	1	1	1	0	1	0	1	1	0	6	24	1
555	21301303	female	2003	Tianshui Normal University	Freshman	Humanities and SocialSciences	No	168	104	Rural	In poor health	23	0	10	7	0	8	18	52	1	0	0	0	0	23	7	8	1	0	0	0	2	1	2	1	1	0	1	1	1	1	0	0	6	42	1
556	211302107	female	2002	Tianshui Normal University	Freshman	Humanities and SocialSciences	No	162	118	Urban	General health condition	23	0	20	8	0	7	19	59	1	1	1	1	1	23	8	9	0.777778	1	1	0	3	2	7	1	1	1	1	1	2	1	1	0	9	48	1
557	211302118	female	2002	Tianshui Normal University	Freshman	Humanities and SocialSciences	No	160	85	Rural	In good health	23	0	30	7	0	7	19	42.5	0	1	1	1	1	23	7	8	0.875	0	1	0	2	1	4	1	0	0	1	0	0	0	1	0	3	44	1
558	211302130	female	2002	Tianshui Normal University	Freshman	Humanities and SocialSciences	No	167	135	Urban	General health condition	23	0	30	7	0	8	19	67.5	1	1	2	2	0	23	7	8	1	0	2	0	1	1	6	1	1	0	0	1	0	0	1	0	4	44	1
559	211302127	female	2003	Tianshui Normal University	Freshman	Humanities and SocialSciences	No	165	105	Urban	General health condition	23	0	5	7	0	8	18	52.5	0	0	1	1	0	23	7	8	1	0	1	0	0	0	2	0	0	0	0	0	0	0	0	0	0	50	1
560	211301310	female	2001	Tianshui Normal University	Freshman	Humanities and SocialSciences	No	154	100	Urban	In good health	23	0	20	6	0	7	20	50	1	1	0	1	1	23	6	7	1	0	2	0	2	1	6	0	0	0	0	0	0	0	0	0	0	29	1
561	211301329	female	2001	Tianshui Normal University	Freshman	Humanities and SocialSciences	No	151	110	Rural	General health condition	0	0	15	7	0	7	20	55	1	0	1	1	1	0	7	7	1	0	1	0	3	2	6	1	2	1	1	1	2	1	0	0	9	40	1
562	211301327	female	2002	Tianshui Normal University	Freshman	Humanities and SocialSciences	No	169	100	Rural	In good health	23	0	40	6	0	7	19	50	1	2	0	1	1	23	6	7	1	0	1	0	2	1	5	2	1	1	1	1	1	1	1	0	9	38	1
563	210302141	female	2002	Tianshui Normal University	Freshman	Humanities and SocialSciences	No	165	121	Rural	General health condition	23	0	40	6	0	7	19	60.5	1	2	1	2	1	23	6	7	1	0	1	0	2	1	6	1	1	1	1	0	0	1	0	0	5	49	1
564	211301314	female	2002	Tianshui Normal University	Freshman	Humanities and SocialSciences	No	160	104	Rural	In good health	23	0	15	6	0	7	19	52	1	0	1	1	1	23	6	7	1	0	1	0	2	1	5	0	0	0	0	0	0	1	1	0	2	33	1
565	211302117	female	2003	Tianshui Normal University	Freshman	Humanities and SocialSciences	No	168	100	Rural	General health condition	0	0	10	6	0	6	18	50	2	0	2	1	2	0	6	6	1	0	2	0	5	3	10	0	0	1	1	1	0	1	0	0	4	38	2
566	211302103	female	2002	Tianshui Normal University	Freshman	Humanities and SocialSciences	No	160	84	Rural	In poor health	23	0	30	6	30	7	19	42	1	1	2	2	1	23	6.5	7.5	0.933333	0	1	2	4	2	9	1	1	2	1	0	0	2	0	0	7	55	1
567	211302116	female	2003	Tianshui Normal University	Freshman	Humanities and SocialSciences	No	161	88	Rural	In good health	23	0	5	6	0	7	18	44	1	0	0	0	1	23	6	7	1	0	1	0	1	1	4	0	0	1	0	0	0	1	0	0	2	24	1
568	211601242	female	2002	Tianshui Normal University	Freshman	Humanities and SocialSciences	No	155	104	Rural	In good health	0	0	20	6	0	6	19	52	0	1	1	1	2	0	6	6	1	0	0	0	2	1	4	0	0	0	0	2	0	0	0	0	2	48	2
569	211302122	female	2002	Tianshui Normal University	Freshman	Humanities and SocialSciences	No	160	90	Rural	In good health	23	0	30	6	0	7	19	45	0	1	3	2	1	23	6	7	1	0	1	0	1	1	5	1	1	0	1	2	0	0	0	0	5	35	1
570	211302120	female	2002	Tianshui Normal University	Freshman	Humanities and SocialSciences	No	159	98	Rural	In good health	22	0	20	6	0	7	19	49	1	1	3	2	1	22	6	8	0.875	0	2	0	4	2	8	1	1	3	2	1	2	1	1	0	12	36	1
571	211302114	female	2002	Tianshui Normal University	Freshman	Humanities and SocialSciences	No	165	116	Rural	General health condition	23	0	60	6	30	7	19	58	2	2	3	3	1	23	6.5	7.5	0.933333	0	2	0	4	2	10	1	0	1	2	2	0	1	1	0	8	38	1
572	211301302	female	2001	Tianshui Normal University	Freshman	Humanities and SocialSciences	No	163	110	Rural	General health condition	23	0	30	6	0	7	20	55	1	1	1	1	1	23	6	7	1	0	1	0	6	3	7	1	0	0	1	1	0	1	0	0	4	36	1
573	211301328	female	2002	Tianshui Normal University	Freshman	Humanities and SocialSciences	No	162	98	Rural	General health condition	23	0	30	6	0	6	19	49	1	1	0	1	2	23	6	7	0.857143	0	1	0	4	2	7	1	1	1	1	1	1	1	0	0	7	33	1
574	21302115	female	2002	Tianshui Normal University	Freshman	Humanities and SocialSciences	No	152	100	Rural	In good health	22	0	30	8	0	6	19	50	1	1	1	1	2	22	8	10	0.6	3	1	0	0	0	8	1	0	0	0	0	0	1	0	0	2	17	1
575	211301324	female	2003	Tianshui Normal University	Freshman	Humanities and SocialSciences	No	160	130	Rural	In poor health	23	0	2	6	0	6	18	65	0	0	0	0	2	23	6	7	0.857143	0	1	0	2	1	4	0	0	0	2	0	0	1	0	0	3	23	1
576	211301322	female	2000	Tianshui Normal University	Freshman	Humanities and SocialSciences	No	153	86	Rural	In very good health	23	0	3	8	0	8	21	43	1	0	0	0	0	23	8	9	0.888889	0	1	0	0	0	2	0	1	0	0	1	0	0	0	0	2	32	1
577	211301325	female	2001	Tianshui Normal University	Freshman	Humanities and SocialSciences	No	165	112	Rural	General health condition	23	0	60	6	0	6	20	56	2	2	3	3	2	23	6	7	0.857143	0	1	0	4	2	10	1	0	1	2	0	1	1	0	0	6	50	1
578	211301326	female	2002	Tianshui Normal University	Freshman	Humanities and SocialSciences	No	163	104	Rural	In poor health	23	0	60	6	0	6	19	52	2	2	3	3	2	23	6	7	0.857143	0	2	1	4	2	12	1	0	2	2	0	1	1	0	0	7	43	1
579	211301312	female		Tianshui Normal University	Freshman	Humanities and SocialSciences	No			Rural	General health condition	23	0	200	7	0	7			2	3	3	3	1	23	7	8	0.875	0	1	0	5	3	10	1	1	1	1	0	0	1	0	0	5	53	1
580	211302104	female	2003	Tianshui Normal University	Freshman	Humanities and SocialSciences	No	161	118	Rural	In good health	22	0	10	6	0	7	18	59	1	0	0	0	1	22	6	8	0.875	0	1	0	2	1	4	0	0	0	0	0	0	0	0	0	0	30	1
581	211302109	female	2002	Tianshui Normal University	Freshman	Humanities and SocialSciences	No	168	118	Urban	In good health	23	0	30	8	0	8	19	59	1	1	3	2	0	23	8	9	0.888889	0	1	0	2	1	5	1	0	1	1	1	0	1	1	0	6	31	1
582	211301316	female	2003	Tianshui Normal University	Freshman	Humanities and SocialSciences	Yes	169	114	Urban	General health condition	23	0	40	6	0	7	18	57	2	2	2	2	1	23	6	7	1	0	1	0	5	3	9	1	0	2	1	2	3	2	2	0	13	37	3
583	211302123	male	2002	Tianshui Normal University	Freshman	Humanities and SocialSciences	No	179	146	Rural	In very good health	0	0	10	6	0	6	19	73	1	0	0	0	2	0	6	6	1	0	1	0	0	0	4	1	1	0	1	0	0	1	0	0	4	23	1
584	213302110	female	2002	Tianshui Normal University	Freshman	Humanities and SocialSciences	No	167	102	Rural	In poor health	0	0	10	6	0	8	19	51	1	0	2	1	0	0	6	6	1.33333	0	1	0	2	1	4	0	0	0	1	1	0	0	0	0	2	24	1
585	211301309	female	2002	Tianshui Normal University	Freshman	Humanities and SocialSciences	No	168	160	Rural	In poor health	0	0	10	6	0	6	19	80	1	0	0	0	2	0	6	6	1	0		0	3	2		0	0	0	0	0	0	1	1	0	2	43	1
586	211301317	female	2003	Tianshui Normal University	Freshman	Humanities and SocialSciences	No	158	88	Rural	In good health	22	0	10	7	0	8	18	44	1	0	1	1	0	22	7	9	0.888889	0	1	0	3	2	5	1	1	1	1	0	0	0	1	0	5	30	1
587	211301311	female	2001	Tianshui Normal University	Freshman	Humanities and SocialSciences	No	156	104	Rural	In good health	23	0	30	7	0	7	20	52	1	1	2	2	1	23	7	8	0.875	0	1	0	2	1	6	1	1	1	0	1	0	1	0	0	5	35	1
588	211302108	female	2003	Tianshui Normal University	Freshman	Humanities and SocialSciences	No	158	120	Urban	In poor health	23	0	35	7	0	7	18	60	3	2	3	3	1	23	7	8	0.875	0		1	4	2		1	1	0	0	0	1	3	0	0	6	64	2
589	211301301	female	2000	Tianshui Normal University	Freshman	Humanities and SocialSciences	No	170	160	Rural	In good health	23	0	30	6	0	7	21	80	1	1	1	1	1	23	6	7	1	0	1	0	2	1	5	0	0	1	1	1	1	0	0	0	4	51	1
590	211301320	female	2003	Tianshui Normal University	Freshman	Humanities and SocialSciences	No	168	140	Rural	In good health	22	0	10	6	0	8	18	70	0	0	0	0	0	22	6	8	1	0	1	0	0	0	1	0	0	0	0	0	0	0	0	0	0	20	1
591	211302126	female	2003	Tianshui Normal University	Freshman	Humanities and SocialSciences	No	159	120	Rural	In good health	23	0	30	6	0	7	18	60	1	1	0	1	1	23	6	7	1	0	0	0	0	0	3	0	0	0	0	0	0	0	0	0	0	32	1
592	211301313	female	2002	Tianshui Normal University	Freshman	Science	No	165	116	Rural	In good health	22	30	30	6	30	8	19	58	0	1	2	2	0	22.5	6.5	8	1	0	1	0	0	0	3	0	0	0	0	0	0	0	0	0	0	31	1
593	211301305	female	2003	Tianshui Normal University	Freshman	Science	No	170	136	Rural	In good health	0	0	20	6	0	6	18	68	1	1	0	1	2	0	6	6	1	0	1	0	0	0	5	0	0	0	0	0	0	0	0	0	0	32	1
594	211301300	female	2002	Tianshui Normal University	Freshman	Humanities and SocialSciences	No	157	95	Urban	In good health	23	0	30	6	0	7	19	47.5	2	1	2	2	1	23	6	7	1	0	2	0	5	3	10	1	1	3	3	3	1	1	0	0	13	40	3
595	3700813017	female	2002	Xi’an University of Technology	Sophomore	Science	No	162	96	Rural	General health condition	23	30	30	7	0	6	19	48	1	1	2	2	2	23.5	7	7.5	0.8	1	0	0	3	2	8	1	1	1	1	1	1	0	0	0	6	51	1
596	3200813028	female	2003	Xi’an University of Technology	Sophomore	Science	No	163	98	Rural	In good health	23	30	30	7	15	7	18	49	1	1	1	1	1	23.5	7.25	7.75	0.903226	0	1	0	2	1	5	1	1	1	1	1	0	0	0	0	5		1
597	3200831010	female	2003	Xi’an University of Technology	Sophomore	Science	No	166	116	Rural	In good health	0	30	30	7	30	6	18	58	1	1	2	2	2	0.5	7.5	7	0.857143	0	0	0	4	2	7	1	0	0	0	0	0	0	0	0	1	37	1
598	3200822020	female	2003	Xi’an University of Technology	Sophomore	Science	No	158	94	Rural	In poor health	1	0	15	7	30	6.25	18	47	1	0	0	0	1	1	7.5	6.5	0.961538	0	1	0	4	2	5	1	0	0	1	1	0	0	0	0	3	40	1
599	3200822021	female	2002	Xi’an University of Technology	Sophomore	Science	No	161	90	Urban	General health condition	1	30	10	7	20	5.7	19	45	2	0	0	0	2	1.5	7.33333	5.83333	0.977143	0	1	0	4	2	7	1	0	0	1	1	0	0	0	0	3	36	1
600	3200822023	female	2002	Xi’an University of Technology	Sophomore	Science	No	162	102	Rural	In good health	23	0	20	7	0	7.5	19	51	0	1	0	1	0	23	7	8	0.9375	0	1	0	0	0	2	1	0	0	0	0	0	0	0	0	1	22	1
601	3210121105	male	2003	Xi’an University of Technology	Freshman	Engineering	No	177	120	Rural	In very poor health	23	0	30	6	0	7	18	60	3	1	3	2	1	23	6	7	1	0	1	3	6	3	13	3	3	3	3	3	3	3	3	3	27	17	1
602	3210121118	male	2003	Xi’an University of Technology	Freshman	Engineering	No	173	130	Rural	General health condition	23	30	5	7	10	7.5	18	65	0	0	1	1	0	23.5	7.16667	7.66667	0.978261	0	1	0				0	1	0	1	0	1	0	0	0	3	36	1
603	3210121127	male	2002	Xi’an University of Technology	Freshman	Engineering	No	171	148	Rural	In very good health	23	0	10	6	30	7	19	74	0	0	0	0	1	23	6.5	7.5	0.933333	0	1	0	1	1	3	1	0	0	1	0	1	0	1	0	4	32	1
604	3210121126	male	2003	Xi’an University of Technology	Freshman	Engineering	No	171	165	Urban	General health condition	23	0	8	6	30	7	18	82.5	1	0	0	0	1	23	6.5	7.5	0.933333	0	1	0	2	1	4	1	0	0	1	0	1	1	0	0	4	35	1
605	3210121121	male	2003	Xi’an University of Technology	Freshman	Science	No	178	116	Rural	In good health	0	0	5	7	0	7	18	58	1	0	1	1	1	0	7	7	1	0	1	0	1	1	5	1	0	0	1	1	1	1	0	0	5	24	1
606	3210131011	female	2002	Xi’an University of Technology	Freshman	Engineering	No	164	104	Rural	General health condition	0	0	10	7	0	7	19	52	1	0	0	0	1	0	7	7	1	0		0	4	2		1	1	0	0	0	1	0	0	0	3		3
607	3210131006	female	2002	Xi’an University of Technology	Freshman	Engineering	No	166	100	Rural	In good health	0	0	5	6	30	6	19	50	1	0	0	0	2	0	6.5	6.5	0.923077	0	1	0	4	2	6	0	0	0	0	0	1	1	0	0	2	31	1
608	3210121119	male	2002	Xi’an University of Technology	Freshman	Engineering	No	188	182	Rural	In very good health	23	30	30	7	0	7	19	91	1	1	1	1	1	23.5	7	7.5	0.933333	0	1	0	2	1	5	1	0	1	0	1	0	1	0	0	4	31	1
609	3210121105	female	2002	Xi’an University of Technology	Freshman	Science	No	160	102	Rural	General health condition	0	0	20	7	0	6	19	51	1	1	1	1	2	0	7	7	0.857143	0	1	0	5	3	8	1	2	1	1	0	2	2	1	0	10	50	1
610	3210131008	female	2003	Xi’an University of Technology	Freshman	Engineering	No	163	102	Rural	In good health	0	0	10	7	0	6	18	51	1	0	1	1	2	0	7	7	0.857143	0	1	0	4	2	7	1	0	0	1	0	0	1	1	0	4		1
611	3210121110	female	2001	Xi’an University of Technology	Freshman	Science	No	162	104	Rural	In good health	1	0	30	7	0	6	20	52	0	1	0	1	2	1	7	6	1	0	0	0	0	0	3	0	0	0	0	0	0	0	0	0	0	27	1
612	3210121115	female	2000	Xi’an University of Technology	Freshman	Engineering	No	163	126	Rural	General health condition	23	0	10	7	0	8	21	63	0	0	1	1	0	23	7	8	1	0	1	0	4	2	4	1	1	0	0	1	1	1	0	1	6	35	1
613		male	1988	Xi’an University of Technology	PhD Candidate	Humanities and SocialSciences	Yes	176	130	Urban	In poor health	1	0	30	7	0	6	33	65	2	1	3	2	2	1	7	6	1	0	1	0	6	3	10	1	1	1	1	1	0	1	0	0	6	37	1
614	3210911032	male	2003	Xi’an University of Technology	Freshman	Engineering	No	170	106	Rural	In very good health	0	0	10	7	0	8	18	53	0	0	1	1	0	0	7	7	1.14286	0	1	0	0	0	2	1	0	0	0	0	0	0	0	0	1	17	3
615	3210911030	male	2004	Xi’an University of Technology	Freshman	Engineering	No	175	130	Rural	In poor health	1	0	30	8	0	8	17	65	2	1	3	2	0	1	8	7	1.14286	0	1	0	6	3	8	2	2	3	3	2	2	2	2	0	18	51	1
616	3210911027	male	2002	Xi’an University of Technology	Freshman	Engineering	No	175	120	Urban	In very good health	22	0	15	6	30	7	19	60	1	0	0	0	1	22	6.5	8.5	0.823529	1	0	0	0	0	3	0	0	0	0	0	0	0	0	0	0	17	3
617	3210911019	male	2003	Xi’an University of Technology	Freshman	Engineering	No	178	110	Urban	In good health	23	0	5	7	0	7	18	55	1	0	1	1	1	23	7	8	0.875	0	0	0	1	1	4	0	0	0	0	0	0	0	0	0	0	48	3
618	3210911012	male	2002	Xi’an University of Technology	Freshman	Engineering	No	178	155	Rural	In good health	0	0	30	6	40	6	19	77.5	1	1	0	1	2	0	6.66667	6.66667	0.9	0	0	0	0	0	4	0	0	0	0	1	0	1	0	0	2	41	1
619	3210911025	male	2003	Xi’an University of Technology	Freshman	Engineering	No	170	108	Rural	In poor health	23	0	20	7	0	6.5	18	54	2	1	1	1	1	23	7	8	0.8125	1	1	0	4	2	8	1	1	2	1	1	1	1	1	1	10	43	1
620	3210911033	male	2002	Xi’an University of Technology	Freshman	Engineering	No	176	126	Urban	General health condition	0	0	15	8	0	8	19	63	1	0	1	1	0	0	8	8	1	0	2	3	6	3	10	2	2	2	2		2	1	0	0		48	3
621	3210911031	male	2003	Xi’an University of Technology	Freshman	Engineering	No	172	102	Rural	General health condition	0	0	10	7	0	7	18	51	0	0	0	0	1	0	7	7	1	0	0	0	0	0	1	1	0	0	0	0	0	0	0	0	1	21	1
622	3210911024	female	2003	Xi’an University of Technology	Freshman	Engineering	No	166	110	Urban	In good health	23	0	5	7	0	8	18	55	1	0	0	0	0	23	7	8	1	0	1	0	2	1	3	0	1	0	1	0	0	1	0	0	3	41	3
623	3210911029	female	2004	Xi’an University of Technology	Freshman	Engineering	No	161	92	Rural	In poor health	22	0	15	7	0	9	17	46	0	0	0	0	0	22	7	9	1	0	1	0	0	0	1	1	1	0	0	0	0	0	0	0	2	31	1
624	3210911034	male	2003	Xi’an University of Technology	Freshman	Engineering	No	179	125	Rural	In poor health	0	0	10	7	0	7	18	62.5	1	0	1	1	1	0	7	7	1	0	1	0	5	3	7	1	1	2	0	1	0	1	0	0	6	38	1
625	3210911008	male	2001	Xi’an University of Technology	Freshman	Science	No	176	140	Rural	In poor health	23	0	5	7	0	8	20	70	0	0	0	0	0	23	7	8	1	0	0	0	2	1	1	1	1	0	1	0	0	1	0	0	4	36	1
626	3210911005	male	2003	Xi’an University of Technology	Freshman	Science	No	172	160	Urban	General health condition	0	0	10	6	0	6	18	80	0	0	1	1	2	0	6	6	1	0	1	0	0	0	4	0	0	0	0	0	0	2	0	0	2	34	1
627	3210911026	male	2003	Xi’an University of Technology	Freshman	Engineering	No	171	120	Urban	General health condition	0	0	5	7	0	7	18	60	1	0	2	1	1	0	7	7	1	0	1	0	3	2	6	1	1	1	1	1	2	3	0	1	11	62	2
628	3210911017	male	2002	Xi’an University of Technology	Freshman	Engineering	No	173	126	Rural	General health condition	0	0	10	7	0	7	19	63	1	0	0	0	1	0	7	7	1	0	0	0	0	0	2	0	0	0	0	0	0	0	0	0	0	23	1
629	3210911003	male	2003	Xi’an University of Technology	Freshman	Engineering	No	164	120	Rural	In good health	0	0	30	6	30	7	18	60	1	1	0	1	1	0	6.5	6.5	1.07692	0	0	0	0	0	3	0	0	0	0	0	0	0	0	0	0	20	1
630	3210911023	female	2002	Xi’an University of Technology	Freshman	Engineering	No	170	135	Rural	General health condition	23	0	10	7	0	8	19	67.5	1	0	1	1	0	23	7	8	1	0	1	0	5	3	6	1	0	1	1	1	0	2	0	0	6		1
631	3210911004	male	2002	Xi’an University of Technology	Freshman	Engineering	No	183	101	Urban	General health condition	0	0	5	6	0	7	19	50.5	1	0	0	0	1	0	6	6	1.16667	0	1	0	0	0	3	1	0	0	0	0	0	0	0	0	1	27	3
632	3210911001	male	2002	Xi’an University of Technology	Freshman	Science	No	184	168	Urban	In very good health	0	0	30	7	0	6	19	84	0	1	1	1	2	0	7	7	0.857143	0	1	0	1	1	5	0	0	0	0	0	0	0	0	0	0	38	1
633	3210911006	male	2003	Xi’an University of Technology	Freshman	Science	No	180	120	Rural	General health condition	0	0	30	7	0	6	18	60	2	1	2	2	2	0	7	7	0.857143	0	1	0	2	1	8	0	0	0	0	0	0	0	0	0	0		1
634	3210911010	male	2002	Xi’an University of Technology	Freshman	Engineering	No	177	160	Urban	General health condition	23	0	20	7	0	6	19	80	0	1	0	1	2	23	7	8	0.75	1	1	0	1	1	6	0	1	0	0	0	0	0	0	0	1	28	1
635	3210911022	female	2003	Xi’an University of Technology	Freshman	Engineering	No	166	120	Rural	In good health	22	30	10	6	30	8	18	60	0	0	0	0	0	22.5	6.5	8	1	0	1	0	0	0	1	1	0	1	0	0	0	1	0	0	3	27	2
636	3210911009	male	2002	Xi’an University of Technology	Freshman	Science	No	179	140	Urban	In good health	0	0	20	7	0	6.5	19	70	0	1	0	1	1	0	7	7	0.928571	0	0	0	2	1	3	0	0	0	0	0	0	1	0	0	1	23	3
637	3210911011	female	2003	Xi’an University of Technology	Freshman	Engineering	No	161	100	Rural	In good health	0	0	60	8	0	7	18	50	1	2	0	1	1	0	8	8	0.875	0	1	0	1	1	5	1	0	1	2	1	0	2	1	0	8	37	1
638	321091107	female	2003	Xi’an University of Technology	Freshman	Engineering	No	161	120	Urban	General health condition	23	0	5	7	0	8	18	60	0	0	0	0	0	23	7	8	1	0	0	0	0	0	0	0	0	0	0	0	0	0	0	0	0	23	2
639	3210911002	female	2003	Xi’an University of Technology	Freshman	Engineering	No	172	150	Urban	General health condition	23	0	55	6	30	6.5	18	75	1	2	2	2	1	23	6.5	7.5	0.866667	0	1	0	2	1	6	1	1	1	0	0	1	1	0	0	5	33	3
640	3210911020	female	2002	Xi’an University of Technology	Freshman	Engineering	No	163	106	Urban	General health condition	23	0	5	8	0	8	19	53	1	0	1	1	0	23	8	9	0.888889	0	1	0	1	1	4	0	0	0	0	0	0	0	0	0	0		2
641	3210911021	male	2002	Xi’an University of Technology	Freshman	Engineering	No	172	180	Rural	General health condition	23	50	25	7	0	7	19	90	2	1	1	1	1	23.8333	7	7.16667	0.976744	0	1	0	4	2	7	1	0	1	1	0	0	0	0	0	3	56	1
642	3210911014	male	2003	Xi’an University of Technology	Freshman	Engineering	No	172	130	Rural	In poor health	23	0	3	6	0	6	18	65	1	0	0	0	2	23	6	7	0.857143	0	1	0	2	1	5	0	0	0	0	0	0	0	0	0	0	25	1
643	3210911013	male	2003	Xi’an University of Technology	Freshman	Engineering	No	180	200	Urban	In good health	23	0	20	7	0	7	18	100	1	1	1	1	1	23	7	8	0.875	0	1	0	4	2	6	0	0	0	1	1	0	1	0	0	3	39	1
644	3210911015	female	2002	Xi’an University of Technology	Freshman	Engineering	No	168	110	Rural	In good health	23	45	10	6	50	7	19	55	1	0	1	1	1	23.75	6.83333	7.08333	0.988235	0	1	0	2	1	5	0	0	0	0	0	0	0	0	0	0	22	1
645	3210911018	female	2000	Xi’an University of Technology	Freshman	Engineering	No	158	83	Rural	General health condition	23	30	10	6	30	7	21	41.5	1	0	1	1	1	23.5	6.5	7	1	0	1	0	2	1	5	0	0	0	0	0	0	0	0	0	0	23	1
646	3210911016	male	2002	Xi’an University of Technology	Freshman	Science	No	165	120	Urban	In good health	0	0	8	8	0	8	19	60	1	0	1	1	0	0	8	8	1	0	1	0	2	1	4	0	0	0	1	0	0	1	0	0	2	30	3
647	3210111029	male	2002	Xi’an University of Technology	Freshman	Engineering	No	178	135	Urban	In good health	23	0	30	7	0	6.5	19	67.5	1	1	1	1	1	23	7	8	0.8125	1	1	0	1	1	6	1	1	0	0	1	0	1	0	0	4	40	1
648	3200241055	male	2002	Xi’an University of Technology	Sophomore	Engineering	No	174	138	Rural	General health condition	23	30	5	6	40	7	19	69	0	0	0	0	1	23.5	6.66667	7.16667	0.976744	0	1	0	2	1	3	1	0	0	1	0	0	0	0	0	2	36	1
649	3210111054	male	2003	Xi’an University of Technology	Freshman	Engineering	No	172	120	Rural	General health condition	0	0	10	7	0	7	18	60	1	0	1	1	1	0	7	7	1	0	1	0	3	2	6	1	1	1	1	1	1	1	1	0	8	48	1
650	3210111051	male	2002	Xi’an University of Technology	Freshman	Science	No	172	140	Rural	General health condition	23	0	30	6	30	7	19	70	1	1	1	1	1	23	6.5	7.5	0.933333	0	1	0	2	1	5	1	1	1	1	0	1	1	0	0	6	24	1
651	3210111055	male	2003	Xi’an University of Technology	Freshman	Engineering	No	183	157	Rural	In good health	0	0	5	8	0	8	18	78.5	1	0	0	0	0	0	8	8	1	0	0	0	0	0	1	0	0	0	0	0	1	1	0	0	2	26	1
652	3210111031	male	2003	Xi’an University of Technology	Freshman	Engineering	No	181	190	Rural	In poor health	0	0	12	7	0	6	18	95	1	0	0	0	2	0	7	7	0.857143	0	0	0	3	2	5	0	0	0	0	0	0	0	0	0	0	33	3
653	3210131012	male	2002	Xi’an University of Technology	Freshman	Engineering	No	176	136	Rural	In very good health	0	0	10	7	0	7	19	68	1	0	0	0	1	0	7	7	1	0	0	0	0	0	2	0	0	0	0	0	0	0	0	0	0	22	1
654	3210111033	male	2002	Xi’an University of Technology	Freshman	Science	No	185	140	Rural	In poor health	23	0	30	6	0	6	19	70	1	1	2	2	2	23	6	7	0.857143	0	1	0	5	3	9	1	1	1	2	1	1	1	2	0	10	40	3
655	3210131005	male	2003	Xi’an University of Technology	Freshman	Science	No	185	160	Urban	In poor health	23	0	20	7	0	7	18	80	0	1	0	1	1	23	7	8	0.875	0	0	0	0	0	2	0	0	0	0	0	0	0	0	0	0	42	1
656	3210131007	male	2001	Xi’an University of Technology	Freshman	Engineering	No	175	140	Rural	General health condition	2	0	30	7	0	6	20	70	2	1	1	1	2	2	7	5	1.2	0		0	3	2		1	1	2	2	3	1	1	1	0	12	37	1
657	3210111045	male	2003	Xi’an University of Technology	Freshman	Engineering	No	172	106	Rural	In good health	23	0	30	6	0	7	18	53	1	1	2	2	1	23	6	7	1	0	1	0	1	1	6	1	0	1	1	2	0	2	3	0	10	39	1
658	3210111056	male	2003	Xi’an University of Technology	Freshman	Engineering	No	172	116	Urban	In good health	0	0	15	7	0	7	18	58	1	0	1	1	1	0	7	7	1	0	1	0	4	2	6	1	0	0	0	0	0	0	0	0	1	42	1
659	3210131010	male	2003	Xi’an University of Technology	Freshman	Engineering	No	175	150	Urban	In very good health	0	0	30	7	0	7	18	75	1	1	1	1	1	0	7	7	1	0	2	0	6	3	8	0	0	0	1	1	0	1	0	0	3	45	3
660	3210111034	female	2002	Xi’an University of Technology	Freshman	Engineering	No	169	98	Urban	General health condition	23	0	5	7	0	8	19	49	1	0	1	1	0	23	7	8	1	0	1	0	3	2	5	1	1	0	0	1	1	1	0	0	5	28	3
661	3210111053	female	2003	Xi’an University of Technology	Freshman	Engineering	No	167	105	Rural	In good health	0	0	10	7	0	6	18	52.5	1	0	0	0	2	0	7	7	0.857143	0	1	0	2	1	5	0	0	1	0	1	0	0	0	0	2	49	1
662	3210111048	male	2003	Xi’an University of Technology	Freshman	Science	No	177	120	Rural	In good health	23	0	10	7	0	8	18	60	1	0	0	0	0	23	7	8	1	0	1	0	2	1	3	1	1	0	0	0	1	1	0	0	4	37	1
663	3210111009	male	2002	Xi’an University of Technology	Freshman	Engineering	No	179	114	Rural	General health condition	23	30	20	7	0	7	19	57	2	1	1	1	1	23.5	7	7.5	0.933333	0	1	0	4	2	7	1	1	1	1	1	1	1	1	0	8		2
664	3210111038	male	2003	Xi’an University of Technology	Freshman	Engineering	No	173	140	Urban	In good health	23	0	30	7	0	5	18	70	1	1	0	1	2	23	7	8	0.625	3	0	0	0	0	7	0	1	0	1	0	0	1	1	0	4	39	1
665	3210111036	male	2003	Xi’an University of Technology	Freshman	Engineering	No	161	161	Rural	In good health	0	0	3	7	0	7	18	80.5	1	0	0	0	1	0	7	7	1	0	1	0	2	1	4	1	0	1	1	0	0	0	0	0	3	23	1
666	3210243025	male	2003	Xi’an University of Technology	Freshman	Engineering	No	176	177	Urban	General health condition	23	0	5	7	0	8	18	88.5	0	0	0	0	0	23	7	8	1	0	1	0	1	1	2	0	0	0	0	0	0	0	0	0	0	39	1
667	3210243024	male	2003	Xi’an University of Technology	Freshman	Engineering	No	173	145	Rural	In good health	0	0	3	7	0	7	18	72.5	0	0	0	0	1	0	7	7	1	0	0	0	2	1	2	0	0	0	0	0	0	0	0	1	1	26	1
668	3210243019	male	2002	Xi’an University of Technology	Freshman	Engineering	No	170	124	Rural	In good health	0	0	15	7	0	7	19	62	1	0	1	1	1	0	7	7	1	0	1	0	4	2	6	1	1	2	1	1	0	1	0	0	7	46	1
669	3210243023	male	2003	Xi’an University of Technology	Freshman	Engineering	No	172	102	Rural	General health condition	0	0	20	6	30	7	18	51	1	1	1	1	1	0	6.5	6.5	1.07692	0	1	0	0	0	4	1	1	0	0	0	1	1	0	0	4	36	1
670	3210243022	male	2003	Xi’an University of Technology	Freshman	Engineering	No	180	160		In good health	23	0	10	7	0	7	18	80	1	0	0	0	1	23	7	8	0.875	0	0	0	4	2	4	0	0	0	0	0	0	0	0	0	0	39	1
671	3200243003	male	2002	Xi’an University of Technology	Freshman	Engineering	No	171	161	Urban	In very good health	0	0	5	6	0	6	19	80.5	0	0	0	0	2	0	6	6	1	0	0	0	0	0	2	0	0	0	0	0	0	0	0	0	0	27	2
672	3210243020	male	2003	Xi’an University of Technology	Freshman	Engineering	No	170	140	Rural	General health condition	21	0	5	7	0	7	18	70	1	0	1	1	1	21	7	10	0.7	2	1	0	3	2	8	0	0	0	0	0	0	1	0	0	1	40	1
673	3210243021	female	2003	Xi’an University of Technology	Freshman	Engineering	No	168	100	Rural	In poor health	0	0	10	7	0	7	18	50	1	0	0	0	1	0	7	7	1	0	1	0	2	1	4	1	1	0	1	0	1	1	0	0	5		1
674	3210243018	female	2003	Xi’an University of Technology	Freshman	Engineering	No	168	160	Rural	In good health	0	30	20	6	30	6	18	80	2	1	1	1	2	0.5	6.5	6	1	0	2	0	4	2	9	1	1	0	1	1	1	1	0	0	6	36	1
675	3210243017	male	2002	Xi’an University of Technology	Freshman	Science	No	178	150	Urban	In good health	0	0	30	7	0	6.5	19	75	1	1	0	1	1	0	7	7	0.928571	0	1	0	0	0	4	0	0	0	0	0	0	0	0	0	0	31	1
676	3210243004	male	2002	Xi’an University of Technology	Freshman	Engineering	No	164	110	Rural	General health condition	0	0	30	7	0	6	19	55	2	1	3	2	2	0	7	7	0.857143	0	1	0	3	2	9	0	0	2	0	1	0	0	0	0	3	32	1
677	3210243005	male	2002	Xi’an University of Technology	Freshman	Engineering	No	170	180	Rural	In poor health	0	0	10	7	0	6	19	90	0	0	1	1	2	0	7	7	0.857143	0	1	0	6	3	7	1	1	2	2	2	3	2	1	0	14	24	1
678	3210243006	male	2003	Xi’an University of Technology	Freshman	Engineering	No	177	150	Urban	In very good health	1	0	20	7	0	5	18	75	1	1	1	1	2	1	7	6	0.833333	1	0	0	1	1	6	0	0	0	0	1	1	1	0	0	3	59	2
679	3210243010	male	2003	Xi’an University of Technology	Freshman	Engineering	No	175	158	Urban	In good health	0	0	10	7	0	7	18	79	1	0	0	0	1	0	7	7	1	0	0	0	3	2	4	0	0	0	0	0	1	0	0	0	1	32
680	3210243008	male	2003	Xi’an University of Technology	Freshman	Engineering	No	165	94	Rural	In good health	0	0	5	7	0	7	18	47	0	0	0	0	1	0	7	7	1	0	0	0	0	0	1	0	0	0	0	1	0	0	0	0	1	33	1
681	3210243011	male	2003	Xi’an University of Technology	Freshman	Engineering	No	186			General health condition	0	0	7	7	0	7	18		0	0	0	0	1	0	7	7	1	0	1	0	2	1	3	1	0	0	0	0	1	0	0	0	2	33	1
682	3210243029	male	2003	Xi’an University of Technology	Freshman	Engineering	No	175	140	Urban	In good health	0	0	30	6	0	5	18	70	0	1	1	1	2	0	6	6	0.833333	1	1	0	1	1	6	0	1	0	1	0	0	0	0	0	2	31	1
683	3210243030	male	2003	Xi’an University of Technology	Freshman	Engineering	No	172	115	Rural	In good health	0	0	10	7	0	7	18	57.5	1	0	1	1	1	0	7	7	1	0	0	0	0	0	3	0	0	0	0	0	0	0	0	0	0	35	1
684	3210243044	female	2003	Xi’an University of Technology	Freshman	Engineering	No	162	108	Rural	General health condition	23	0	30	6	0	6	18	54	1	1	0	1	2	23	6	7	0.857143	0	0	0	2	1	5	0	0	0	0	0	0	0	0	0	0	17	1
685	3210243035	female	2003	Xi’an University of Technology	Freshman	Engineering	No	169	136	Rural	In good health	0	0	10	6	0	6	18	68	1	0	1	1	2	0	6	6	1	0	1	0	2	1	6	1	1	1	1	1	1	1	1	0	8	38	1
686	3210243045	male	2003	Xi’an University of Technology	Freshman	Engineering	No	181	140	Urban	General health condition	23	0	10	6	10	6.5	18	70	0	0	0	0	1	23	6.16667	7.16667	0.906977	0	0	0	1	1	2	0	0	0	0	0	0	0	0	0	0	36	1
687	3210243050	male	2002	Xi’an University of Technology	Freshman	Engineering	No	170	100	Urban	In poor health	22	0	10	6	0	8	19	50	0	0	0	0	0	22	6	8	1	0	0	0	0	0	0	1	1	0	0	1	0	0	0	1	4	24	1
688	3210243039	male	2002	Xi’an University of Technology	Freshman	Engineering	No	178	162	Urban	General health condition	23	0	30	7	0	6	19	81	1	1	1	1	2	23	7	8	0.75	1	1	0	0	0	6	1	0	0	1	0	0	1	1	1	5	46	1
689	3210243040	male	2003	Xi’an University of Technology	Freshman	Engineering	No	179	210	Rural	In good health	23	0	5	7	0	7	18	105	1	0	1	1	1	23	7	8	0.875	0	1	0	2	1	5	1	1	1	1	0	1	2	1	0	8	42	1
690	3210243036	male	2003	Xi’an University of Technology	Freshman	Engineering	No	171	120	Rural	General health condition	23	0	30	6	0	6	18	60	1	1	1	1	2	23	6	7	0.857143	0	1	0	2	1	6	1	1	0	0	0	1	1	0	0	4	36	1
691	3210243043	male	2003	Xi’an University of Technology	Freshman	Engineering	No	185	170	Urban	General health condition	0	0	10	7	0	6	18	85	1	0	0	0	2	0	7	7	0.857143	0	1	0	6	3	7	1	1	1	1	0	2	1	0	0	7	51	1
692	3210243048	male	2002	Xi’an University of Technology	Freshman	Engineering	No	172	120	Rural	In good health	23	0	10	6	0	7	19	60	0	0	0	0	1	23	6	7	1	0	0	0	6	3	4	3	3	0	3	1	3	3	0	0	16	47	1
693	3212211022	male	2003	Xi’an University of Technology	Freshman	Engineering	No	176	150	Urban	In good health	23	0	60	8	0	7	18	75	1	2	1	2	1	23	8	9	0.777778	1	1	0	1	1	7	0	1	1	1		1	1	0	0		36	3
694	3212211021	female	2003	Xi’an University of Technology	Freshman	Engineering	No	172	120	Urban	General health condition	23	0	5	7	0	6	18	60	0	0	0	0	2	23	7	8	0.75	1	1	0	2	1	5	0	0	0	0	0	0	0	0	0	0	22	2
695	3212211002	female	2003	Xi’an University of Technology	Freshman	Engineering	No	159	88	Urban	General health condition	3	0	30	7	0	5	18	44	1	1	3	2	2	3	7	4	1.25	0	2	0	6	3	10	0	0	0	0	0	0	0	0	0	0	17	2
696	3212211020	male	2002	Xi’an University of Technology	Freshman	Engineering	No	170	150	Urban	General health condition	23	0	30	7	0	6	19	75	1	1	1	1	2	23	7	8	0.75	1	1	0	0	0	6	0	0	1	0	0	0	1	0	0	2	17	3
697	3212211031	male	2003	Xi’an University of Technology	Freshman	Engineering	No	182	145	Urban	In good health	1	0	5	7	0	6	18	72.5	1	0	0	0	2	1	7	6	1	0	1	0	3	2	6	0	0	0	1	0	0	0	0	0	1	42	2
698	3212211001	male	2002	Xi’an University of Technology	Freshman	Engineering	No	175	210	Urban	In poor health			1	6	15		19	105	1	0	0	0			6.25				1	0	6	3		1	0	0	1	1	0	2	0	0	5	19	3
699	3212211017	male	2003	Xi’an University of Technology	Freshman	Engineering	No	175	120	Urban	In good health	0	0	5	7	0	7	18	60	1	0	0	0	1	0	7	7	1	0	0	0	0	0	2	1	1	0	0	0	0	0	0	0	2	17	3
700	3212211018	male	2002	Xi’an University of Technology	Freshman	Engineering	No	178	135	Rural	In very good health	23	0	5	8	0	7	19	67.5	1	0	0	0	1	23	8	9	0.777778	1	0	0	0	0	3	0	0	0	0	1	0	0	0	0	1	36	1
701	3212211028	male	2002	Xi’an University of Technology	Freshman	Engineering	No	183	150	Urban	In good health	2	0	5	8	0	6	19	75	0	0	0	0	2	2	8	6	1	0	1	0	2	1	4	0	0	0	0	0	0	0	0	0	0	17	1
702	3212211014	male	2002	Xi’an University of Technology	Freshman	Engineering	No	170	125	Urban	General health condition	0	0	4	7	0	8	19	62.5	1	0	0	0	0	0	7	7	1.14286	0	0	0	1	1	2	0	0	0	0	1	0	0	0	0	1	18	1
703	3212211016	male	2003	Xi’an University of Technology	Freshman	Engineering	No	182	126	Rural	General health condition	0	0	10	7	0	6	18	63	1	0	0	0	2	0	7	7	0.857143	0	1	0	0	0	4	0	0	0	1	0	0	0	0	0	1	21	1
704	3212211015	male	2004	Xi’an University of Technology	Freshman	Engineering	No	176	140	Urban	General health condition	1	0	5	8	0	7	17	70	3	0	2	1	1	1	8	7	1	0	1	0	6	3	9	0	1	1	3	0	1	1	1	0	8	43	3
705	3212211005	male	2002	Xi’an University of Technology	Freshman	Engineering	No	170	135	Urban	General health condition	0	0	10	7	0	7	19	67.5	1	0	0	0	1	0	7	7	1	0	0	0	2	1	3	1	1	0	1	0	1	1	0	0	5	26	1
706	3212211004	male	2004	Xi’an University of Technology	Freshman	Engineering	No	170	144	Urban	General health condition	1	0	30	7	0	6	17	72	1	1	2	2	2	1	7	6	1	0	1	0	2	1	7	1	0	1	1	1	0	0	0	0	4	31	3
707	3211211003	male	2003	Xi’an University of Technology	Freshman	Engineering	No	175	120	Urban	In good health	0	0	3	7	0	7	18	60	1	0	0	0	1	0	7	7	1	0	1	0	4	2	5	0	0	0	0	0	0	0	0	0	0	51	3
708	3212211007	male	2003	Xi’an University of Technology	Freshman	Engineering	No	186	202	Urban	General health condition	0	0	15	7	0	7	18	101	0	0	1	1	1	0	7	7	1	0	1	0	2	1	4	0	0	0	1	1	0	0	0	0	2	26	3
709	3212211008	male	2002	Xi’an University of Technology	Freshman	Engineering	No	176	132	Urban	In very good health	1	0	5	8	0	6	19	66	0	0	0	0	2	1	8	7	0.857143	0	0	0	0	0	2	0	0	0	0	0	0	0	0	0	0	17	1
710	3212211009	male	2003	Xi’an University of Technology	Freshman	Engineering	No	177	120	Urban	In good health	0	0	5	7	0	6	18	60	1	0	2	1	2	0	7	7	0.857143	0	1	0	0	0	5	0	0	0	0	0	0	0	0	0	0	32	3
711	3212211030	male	2003	Xi’an University of Technology	Freshman	Engineering	No	179	181	Urban	General health condition	0	0	10	7	0	5.5	18	90.5	1	0	0	0	2	0	7	7	0.785714	1	1	0	2	1	6	0	0	0	0	0	0	0	0	0	0	24	1
712	3212211027	male	2003	Xi’an University of Technology	Freshman	Science	No	180	145	Urban	In good health	1	0	30	7	0	5	18	72.5	1	1	3	2	2	1	7	6	0.833333	1	1	0	6	3	10	0	0	0	0	0	0	0	0	0	0	45	3
713	3212211012	male	2003	Xi’an University of Technology	Freshman	Engineering	No	180	122	Urban	In good health	23	30	2	7	30	7	18	61	0	0	0	0	1	23.5	7.5	8	0.875	0	1	0	2	1	3	0	0	0	0	0	0	0	0	0	0	35	3
714	3212211010	male	2003	Xi’an University of Technology	Freshman	Engineering	No	175	145	Urban	In good health	0	0	10	7	0	7	18	72.5	1	0	0	0	1	0	7	7	1	0	0	0	0	0	2	0	0	0	0	0	0	0	0	0	0	60	1
715	3212211011	male	2004	Xi’an University of Technology	Freshman	Engineering	No	173	140	Urban	In good health	0	0	5	8	0	7	17	70	1	0	0	0	1	0	8	8	0.875	0	1	0	3	2	5	0	0	0	0	0	0	0	0	0	0	45	3
716	3212211013	male	2002	Xi’an University of Technology	Freshman	Engineering	No	180	120	Urban	In good health	0	0	30	7	0	6	19	60		1	3	2	2	0	7	7	0.857143	0	1	0	5	3		2	2	3	3	1	3	2	2	3	21	67	1
717	3212211025	male	2002	Xi’an University of Technology	Freshman	Engineering	No	175	119	Urban	In good health	0	30	20	7	10	6.67	19	59.5	1	1	1	1	1	0.5	7.16667	6.66667	1.0005	0	0	0	0	0	3	0	1	0	0	0	0	0	0	0	1	25	1
718	3212211006	male	2002	Xi’an University of Technology	Freshman	Engineering	No	179	126	Urban	In good health	0	0	30	7	0	7	19	63	1	1	2	2	1	0	7	7	1	0	1	0	4	2	7	1	1	1	1	0	0	0	0	1	5	22	1
719	3212211029	female	2003	Xi’an University of Technology	Freshman	Engineering	No	161	100	Rural	In good health	0	0	20	7	0	7	18	50	1	1	1	1	1	0	7	7	1	0	1	0	3	2	6	1	0	0	0	1	0	0	0	0	2	32	1
720	3210121117	female	2003	Xi’an University of Technology	Freshman	Engineering	No	165	105	Rural	General health condition	0	0	10	7	0	6	18	52.5	1	0	0	0	2	0	7	7	0.857143	0	0	0	2	1	4	1	0	0	0	0	0	0	0	0	1	21	1
721	3210121106	male	2003	Xi’an University of Technology	Freshman	Engineering	No	180	135	Urban	In very good health	0	0	30	6	0	6	18	67.5		1	0	1	2	0	6	6	1	0	0	0	0	0		1	1	1	1	1	1	1	1	1	9	51	3
722	3210121105	male	2003	Xi’an University of Technology	Freshman	Engineering	No	175	130	Rural	General health condition	1	0	30	7	0	6	18	65	2	1	2	2	2	1	7	6	1	0	2	0	1	1	9	1	1	1	1	1	1	1	1	1	9	42	1
723	3210121104	male	2002	Xi’an University of Technology	Freshman	Engineering	No	178	126	Rural	In very good health	1	0	30	7	0	6	19	63	1	1	0	1	2	1	7	6	1	0	1	0	2	1	6	0	0	0	0	0	0	0	0	0	0	17	1
724	3210121109	male	2003	Xi’an University of Technology	Freshman	Science	No	185	150	Urban	General health condition	18	0	3	6	0	7	18	75	1	0	0	0	1	18	6	12	0.583333	3	1	0	1	1	7	1	1	1	1	1	1	0	0	0	6	19	1
725	3210131009	female	2003	Xi’an University of Technology	Freshman	Engineering	No	161	100	Urban	In good health	0	0	20	8	0	7	18	50	2	1	1	1	1	0	8	8	0.875	0	1	0	6	3	8	1	1	1	1	1	1	1	1	0	8	46
726	3210121114	female	2002	Xi’an University of Technology	Freshman	Engineering	No	168	117	Urban	In poor health	0	0	30	6	45	6.75	19	58.5	1	1	2	2	1	0	6.75	6.75	1	0	2	0	6	3	9	1	1	1	1	1	0	0	0	0	5	28	1
727	3210121116	male	2003	Xi’an University of Technology	Freshman	Engineering	No	170	120	Rural	In good health	0	0	15	7	0	7	18	60	1	0	2	1	1	0	7	7	1	0	0	0	1	1	4	0	0	0	0	0	0	0	0	0	0	38	1
728	3210121113	male	2004	Xi’an University of Technology	Freshman	Science	No	172	160	Rural	General health condition	1	0	30	6	0	5	17	80	3	1	3	2	2	1	6	5	1	0	1	0	3	2	10	3	3	3	3	3	3	3	3	3	27	45	1
729	3210121107	male	2002	Xi’an University of Technology	Freshman	Engineering	No	183	172	Rural	In good health							19	86	1		1								1	0	0	0		0	0	0	0	0	0	0	0	0	0	17	1
730	3210121123	male	2003	Xi’an University of Technology	Freshman	Engineering	No	175	120	Rural	In good health	23	0	30	6	0	7	18	60	1	1	3	2	1	23	6	7	1	0	0	0	1	1	5	0	0	0	0	0	0	0	0	0	0	18	1
731	3210121124	male	2003	Xi’an University of Technology	Freshman	Engineering	No	175	130	Rural	General health condition	23	30	15	6	40	7	18	65	1	0	0	0	1	23.5	6.66667	7.16667	0.976744	0	0	0	1	1	3	1	0	0	0	1	0	0	0	0	2	28	1
732	3210121112	male	2003	Xi’an University of Technology	Freshman	Engineering	No	176	134	Rural	In good health	23	0		7	0	7	18	67	2		1		1	23	7	8	0.875	0	1	0	6	3		2	1	3	1	1	2	2	1	0	13	29	1
733	3210121125	male	2004	Xi’an University of Technology	Freshman	Engineering	No	180	140	Rural	In good health	23	0	10	6	0	7	17	70	0	0	0	0	1	23	6	7	1	0	0	0	0	0	1	0	0	0	0	0	0	0	0	0	0	20	1
734	3210121111	female	2003	Xi’an University of Technology	Freshman	Engineering	No	163	100	Rural	In good health	0	0	20	7	0	7	18	50	1	1	1	1	1	0	7	7	1	0	1	0	2	1	5	0	0	1	1	0	1	1	0	0	4	30	1
735	3210121103	female	2003	Xi’an University of Technology	Freshman	Engineering	No	164	100	Rural	In good health	0	0	20	6	30	6	18	50	2	1	1	1	2	0	6.5	6.5	0.923077	0		0	6	3		1	2	2	2	3	3	3	2	0	18	41	1
736	3201440005	female	2001	Xi’an University of Technology	Sophomore	Humanities and SocialSciences	No	157	136	Urban	General health condition	0	0	5	7	0	6	20	68	1	0	0	0	2	0	7	7	0.857143	0	0	0	0	0	3	0	0	0	0	0	0	0	0	0	0	34	1
737	3180531040	male	1998	Xi’an University of Technology	Senior	Humanities and SocialSciences	No	183	124	Rural	In very good health	1	0	30	8	0	6	23	62	0	1	0	1	2	1	8	7	0.857143	0	0	0	0	0	3	0	0	0	0	0	0	2	0	0	2	30	1
738	3210441151	male	2003	Xi’an University of Technology	Freshman	Engineering	No	174	130	Rural	General health condition	0	0	1	7	0	7	18	65	1	0	0	0	1	0	7	7	1	0	1	0	0	0	3	0	0	0	0	0	0	0	0	0	0	17	1
739	3200312012	female	2002	Xi’an University of Technology	Sophomore	Engineering	No	158	100	Rural	General health condition	1	0	3	7	0	6	19	50	0	0	0	0	2	1	7	6	1	0	0	0	6	3	5	1	1	2	2	1	1	1	1	0	10	49	1
740	3200501005	female	2002	Xi’an University of Technology	Sophomore	Humanities and SocialSciences	No	160	99	Urban	In good health	23	0	30	8	0	8	19	49.5	1	1	1	1	0	23	8	9	0.888889	0	1	0	4	2	5	0	1	1	1		0	1	0	0		25	1
741	3201821619	male	2002	Xi’an University of Technology	Sophomore	Engineering	No	173	120	Rural	In very good health	23	0	20	7	0	7	19	60	0	1	1	1	1	23	7	8	0.875	0	1	0	2	1	4	0	0	1	1	0	0	0	0	0	2	27	1
742	3200221038	male	1999	Xi’an University of Technology	Sophomore	Engineering	No	160	100	Rural	In good health	23	0	10	7	0	8	22	50	1	0	0	0	0	23	7	8	1	0	1	0	4	2	4	1	0	0	1	1	0	0	0	0	3	38	1
743	3210911035	male	2002	Xi’an University of Technology	Freshman	Science	No	182	120	Rural	In good health	0	0	30	7	0	6	19	60	2	1	3	2	2	0	7	7	0.857143	0	1	0	3	2	9	0	0	3	0	0	0	0	0	0	3		1
744	3190822014	female	2001	Xi’an University of Technology	Junior	Engineering	No	164	110	Urban	In good health	0	0	30	7	0	6.5	20	55	1	1	0	1	1	0	7	7	0.928571	0	0	0	0	0	3	0	0	0	0	0	0	0	0	0	0	17	1
745	3201712053	male	2001	Xi’an University of Technology	Sophomore	Engineering	No	184	144	Urban	In very good health	0	0	30	7	0	8	20	72	0	1	0	1	0	0	7	7	1.14286	0	0	0	0	0	1	0	0	0	0	0	0	0	0	0	0	17	1
746	3200331025	female	2001	Xi’an University of Technology	Sophomore	Engineering	No	163	98	Rural	In good health	0	0	15	7	0	7	20	49	1	0	0	0	1	0	7	7	1	0	1	0	2	1	4	0	0	0	0	0	0	0	0	0	0	42	1
747	3200531024	female	2003	Xi’an University of Technology	Sophomore	Humanities and SocialSciences	No	158	88	Rural	General health condition	0	0	5	7	0	6	18	44	0	0	0	0	2	0	7	7	0.857143	0	0	0	0	0	2	0	0	0	0	0	0	0	0	0	0		1
748	3200511052	female	2002	Xi’an University of Technology	Sophomore	Engineering	No	151	85	Rural	In good health	0	0	15	7	0	7	19	42.5	1	0	1	1	1	0	7	7	1	0	0	0	0	0	3	0	0	0	0	0	0	0	0	0	0	17	1
749	3200511049	female	2002	Xi’an University of Technology	Sophomore	Science	No	152	96	Rural	General health condition	23	0	5	7	0	7.5	19	48	1	0	0	0	0	23	7	8	0.9375	0	1	0	0	0	2	0	0	0	0	0	1	1	0	0	2		1
750	3200511055	female	2000	Xi’an University of Technology	Sophomore	Engineering	No	150	86	Rural	In very good health	23	0	10	7	0	7.5	21	43	1	0	1	1	0	23	7	8	0.9375	0	1	0	4	2	5	0	0	0	0	1	0	0	0	0	1	52
751	3211440033	female	2003	Xi’an University of Technology	Freshman	Science	No	171	112	Urban	In good health	1	0	5	7	0	6	18	56	1	0	0	0	2	1	7	6	1	0	0	0	0	0	3	0	1	0	0	0	0	0	0	0	1	18	3
752	3210661007	male	2003	Xi’an University of Technology	Freshman	Engineering	No	176	148	Rural	In good health	0	0	20	8	0	7	18	74	1	1	1	1	1	0	8	8	0.875	0	1	0	0	0	4	0	0	0	0	0	0	0	0	0	0	18	1
753	3200511047	female	2002	Xi’an University of Technology	Sophomore	Engineering	No	168	180	Urban	General health condition	0	0	15	6	0	7	19	90	2	0	1	1	1	0	6	6	1.16667	0	1	0	0	0	5	1	0	1	0	0	1	0	0	0	3	49	1
754	3190822013	male	2000	Xi’an University of Technology	Junior	Engineering	No	168	138	Rural	In good health	0	0	25	7	0	6.5	21	69	1	1	0	1	1	0	7	7	0.928571	0	0	0	0	0	3	0	0	0	0	0	0	0	0	0	0	17	1
755	3200121039	male	2002	Xi’an University of Technology	Sophomore	Engineering	No	173	119	Rural	In very good health	0	0	15	7	30	6	19	59.5	2	0	1	1	2	0	7.5	7.5	0.8	1	1	0	6	3	10	1	0	1	0	1	1	2	0	0	6	65	1
756	3201712297	male	2002	Xi’an University of Technology	Sophomore	Engineering	No	180	125	Urban	General health condition	23	0	10	7	0	7	19	62.5	1	0	1	1	1	23	7	8	0.875	0	0	0	2	1	4	1	1	0	0	0	0	0	0	0	2	36	1
757	3201712301	male	2002	Xi’an University of Technology	Sophomore	Engineering	No	182	145	Rural	General health condition	0	0	10	7	0	6	19	72.5	0	0	0	0	2	0	7	7	0.857143	0	1	0	0	0	3	1	1	0	1	1	1	1	1	0	7	35	1
758	3201712303	male	2002	Xi’an University of Technology	Sophomore	Science	No	182	168	Urban	General health condition	1	0	30	7	0	6	19	84	1	1	1	1	2	1	7	6	1	0	1	0	0	0	5	0	0	0	0	0	0	0	0	0	0	29	1
759	3201712298	male	2002	Xi’an University of Technology	Sophomore	Engineering	No	176	125	Urban	General health condition	0	0	30	7	0	6	19	62.5	1	1	0	1	2	0	7	7	0.857143	0	1	0	2	1	6	1	0	0	1	1	0	1	0	0	4	35	1
760	3201712295	male	2001	Xi’an University of Technology	Sophomore	Engineering	No	162	122	Rural	In good health	0	30	30	7	30	6	20	61	2	1	2	2	2	0.5	7.5	7	0.857143	0	1	0	2	1	8	1	0	1	1	1	0	1	1	0	6	32	1
761	3201712273		2001	Xi’an University of Technology	Sophomore	Science	No	185	140	Rural	In good health	0	0	10	7	40	7	20	70	1	0	0	0	1	0	7.66667	7.66667	0.913043	0	1	0	3	2	5	0	0	0	0	0	0	0	0	0	0	49	1
762	3201712278	male	2002	Xi’an University of Technology	Sophomore	Engineering	No	182	140	Urban	In good health	0	0	30	7	20	6	19	70	1	1	0	1	2	0	7.33333	7.33333	0.818182	1	0	0	2	1	6	1	1	1	1	1	1	1	2	0	9	45	1
763	3201712280	male	2001	Xi’an University of Technology	Sophomore	Engineering	No	182	120	Urban	General health condition	1	0	40	7	20	8	20	60	1	2	2	2	0	1	7.33333	6.33333	1.26316	0	2	0	2	1	6	1	1	1	1	1	1	1	1	0	8	50	1
764	3201712275	male	2001	Xi’an University of Technology	Sophomore	Engineering	No	178	108	Rural	In good health	0	0	10	7	30	7	20	54	0	0	0	0	1	0	7.5	7.5	0.933333	0	1	0	0	0	2	0	0	0	0	0	0	0	0	0	0	23	1
765	3201712276	male	2002	Xi’an University of Technology	Sophomore	Engineering	No	170	118	Rural	In good health	0	0	5	7	10	7	19	59	1	0	1	1	1	0	7.16667	7.16667	0.976744	0	1	0	2	1	5	1	0	0	0	0	0	0	0	0	1		1
766	3210111037	female	2001	Xi’an University of Technology	Freshman	Engineering	No	164	100	Rural	In good health	0	0	15	7	0	7	20	50	2	0	0	0	1	0	7	7	1	0	1	0	2	1	5	1	0	0	1	1	0	1	0	0	4	44	1
767	3210111047	female	2002	Xi’an University of Technology	Freshman		No	160	90	Rural	In good health	1	0	10	7	0	6	19	45	2	0	1	1	2	1	7	6	1	0		0	4	2		1	0	1	1	0	0	1	0	0	4	50	1
768	3210111032	male	2003	Xi’an University of Technology	Freshman	Engineering	No	171	100	Rural	In good health	0	0	20	6	10	6	18	50	2	1	2	2	2	0	6.16667	6.16667	0.972973	0	1	0	1	1	8	0	0	0	0	1	0	0	0	0	1	32	1
769	3210111043	male	2002	Xi’an University of Technology	Freshman	Engineering	No	165	120	Rural	In very good health	0	0	10	7	0	7	19	60	1	0	0	0	1	0	7	7	1	0	1	0	3	2	5	1	0	1	1	1	0	1	0	0	5	49	1
770	3210111052	female	2003	Xi’an University of Technology	Freshman	Engineering	No	164	110	Urban	General health condition	0	0	10	7	0	7	18	55	1	0	0	0	1	0	7	7	1	0	1	0	2	1	4	0	1	0	1	0	1	1	0	0	4	54	3
771	3210111046	female	2003	Xi’an University of Technology	Freshman	Engineering	No	164	140	Urban	General health condition	0	0	0	7	0	7	18	70	0	0	0	0	1	0	7	7	1	0	1	0	0	0	2	0	0	0	0	3	0	0	0	0	3	56	3
772	3210111035	male	2003	Xi’an University of Technology	Freshman	Engineering	No	183	198	Rural	In good health	0	0	15	7	0	6	18	99	0	0	1	1	2	0	7	7	0.857143	0	2	0	3	2	7	1	0	0	1	2	0	0	1	0	5		1
773	3210111042	male	2003	Xi’an University of Technology	Freshman	Engineering	No	175	180	Rural	In good health	23	0	30	7	0	7	18	90	0	1	0	1	1	23	7	8	0.875	0	0	0	1	1	3	1	1	0	0	0	1	1	0	0	4	28	1
774	3210111041	male	2002	Xi’an University of Technology	Freshman	Engineering	No	175	170	Rural	General health condition	0	0	15	7	0	7	19	85	1	0	2	1	1	0	7	7	1	0	1	0	2	1	5	1	1	0	1	0	1	1	1	0	6	54	1
775	3210111044	female	2004	Xi’an University of Technology	Freshman	Engineering	No	167	118	Rural	In good health	0	0	10	7	0	7	17	59	1	0	2	1	1	0	7	7	1	0	1	0	4	2	6	1	1	1	1	1	1	1	0	0	7	66	1
776	3210111049	male	2002	Xi’an University of Technology	Freshman	Engineering	No	168	160	Rural	General health condition	0	0	5	7	0	7	19	80	1	0	0	0	1	0	7	7	1	0	1	0	0	0	3	0	0	0	0	0	0	0	0	0	0	47	1
777	3200111055	male	1998	Xi’an University of Technology	Freshman	Engineering	No	176	90	Urban	In poor health	0	0	120	7	0	5	23	45	1	3	3	3	2	0	7	7	0.714286	2	1	3	4	2	14	2	1	3	1	3	1	1	1	1	14	26	3
778	3210111050	female	2002	Xi’an University of Technology	Freshman	Engineering	No	153	79	Rural	In very good health	23	30	20	6	50	6	19	39.5	1	1	0	1	2	23.5	6.83333	7.33333	0.818182	1	0	0	0	0	5	0	0	0	0	0	0	0	0	0	0	33	1
779	3210111040	female	2003	Xi’an University of Technology	Freshman	Engineering	No	159	120	Rural	General health condition	0	0	30	7	0	6	18	60	1	1	1	1	2	0	7	7	0.857143	0		0	0	0		0	1	0	0	1	0	0	0	0	2	32	1
780	3210111030	male		Xi’an University of Technology	Freshman	Engineering	No	178	130	Rural	General health condition	0	0	45	6	0	6		65	1	2	2	2	2	0	6	6	1	0	1	0	2	1	7	0	0	1	0	1	1	0	1	0	4	42	1
781	3211631017	male	2003	Xi’an University of Technology	Freshman	Engineering	No	178	180	Rural	General health condition	0	0	10	7	0	6.5	18	90	1	0	1	1	1	0	7	7	0.928571	0		0	6	3		0	0	0	1	0	1	1	0	0	3	45	1
782	3211621071	female	2001	Xi’an University of Technology	Freshman	Engineering	No	158	96	Rural	In good health	0	30	60	6	45	6	20	48	1	2	1	2	2	0.5	6.75	6.25	0.96	0	1	0	0	0	6	0	0	0	0	1	0	0	0	0	1	26	1
783	3211621070		2003	Xi’an University of Technology	Freshman	Engineering	No	167	88	Urban	General health condition	23	0	30	7	0	8	18	44	1	1	1	1	0	23	7	8	1	0	1	0	6	3	6	1	0	1	1	1	1	1	0	0	6	34	1
784	3211621072	female	2004	Xi’an University of Technology	Freshman	Engineering	No	170	90	Urban	In good health	23	0	10	7	0	8	17	45	1	0	0	0	0	23	7	8	1	0	1	0	1	1	3	0	0	0	1	0	0	0	0	0	1		2
785	3211631014	male	2003	Xi’an University of Technology	Freshman	Engineering	No	170	150	Urban	General health condition	0	0	10	7	0	7	18	75	0	0	0	0	1	0	7	7	1	0	0	0	1	1	2	0	0	0	0	0	1	0	0	0	1	51	1
786	3211631001	male	2002	Xi’an University of Technology	Freshman	Engineering	No	168	119	Rural	General health condition	0	0	20	7	0	7	19	59.5	1	1	2	2	1	0	7	7	1	0	1	0	4	2	7	1	1	0	1	1	1	1	0	0	6	34	1
787	3211631011	male	2003	Xi’an University of Technology	Freshman	Engineering	No	178	220	Rural	General health condition	23	0	5	7	0	8	18	110	0	0	0	0	0	23	7	8	1	0	1	0	0	0	1	2	1	1	1	1	2	2	1	0	11	43	1
788	3211621068	female	2003	Xi’an University of Technology	Freshman	Engineering	No	157	103	Urban	In good health	0	0	25	7	0	6	18	51.5	1	1	2	2	2	0	7	7	0.857143	0	1	0	4	2	8	1	1	0	2	0	2	1	1	2	10	60	1
789	3211631007	male	2002	Xi’an University of Technology	Freshman	Engineering	No	169	156	Rural	General health condition	23	30	5	7	0	7	19	78	1	0	0	0	1	23.5	7	7.5	0.933333	0	1	0	0	0	3	2	1	0	1	0	1	0	0	0	5	32	1
790	3211631006	male	2003	Xi’an University of Technology	Freshman	Engineering		175	120	Rural	In good health	23	0	30	6	0	7	18	60	1	1	1	1	1	23	6	7	1	0	0	0	2	1	4	0	0	0	0	0	0	0	0	0	0	17	1
791	3211631008	male	2003	Xi’an University of Technology	Freshman	Engineering	No	180	107	Rural	General health condition	23	0	30	7	0	7	18	53.5	1	1	1	1	1	23	7	8	0.875	0	1	0	2	1	5	0	0	1	0	0	0	0	0	0	1	20	1
792	3211621069	male	2002	Xi’an University of Technology	Freshman	Engineering	No	170	98	Rural	General health condition	0	0	10	8	0	7	19	49	2	0	1	1	1	0	8	8	0.875	0		0	6	3		2	2	2	1	2	3	2	1	0	15	42	1
793	3211621075	male	2003	Xi’an University of Technology	Freshman	Engineering	No	175	125	Rural	General health condition	0	0	30	7	0	7	18	62.5	2	1	2	2	1	0	7	7	1	0	1	0	2	1	7	1	1	0	0	1	0	1	0	0	4	32	1
794	3211621065	female	2003	Xi’an University of Technology	Freshman	Engineering	No	170	110	Urban	In good health	0	0	20	7	0	7	18	55	2	1	3	2	1	0	7	7	1	0	1	0	4	2	8	2	1	1	1	1	2	3	2	2	15	58	3
795	3211631022	male	2001	Xi’an University of Technology	Freshman	Engineering	No	165	100	Rural	General health condition	0	0	20	7	0	6	20	50	2	1	3	2	2	0	7	7	0.857143	0	2	0	5	3	11	1	1	2	0	1	1	1	2	0	9	57	1
796	3211631009	male	2002	Xi’an University of Technology	Freshman	Engineering	No	170	128	Rural	In good health	23	0	15	7	0	8	19	64	1	0	0	0	0	23	7	8	1	0	1	0	2	1	3	0	1	0	1	1	0	1	0	0	4	50	1
797	3211631004	male	2003	Xi’an University of Technology	Freshman	Engineering	No	172	108	Urban	General health condition	0	0	30	7	0	6	18	54	2	1	2	2	2	0	7	7	0.857143	0	1	0	3	2	9	1	1	2	1	1	1	1	0	0	8	40	2
798	3211621074	male	2003	Xi’an University of Technology	Freshman	Engineering	No	176	120	Urban	In good health	0	0	2	7	0	7	18	60	1	0	0	0	1	0	7	7	1	0	0	0	2	1	3	0	0	0	0	1	0	0	0	0	1	29	3
799	3211631921	male	2003	Xi’an University of Technology	Freshman	Engineering	No	167	125	Urban	In good health	0	0	20	7	0	7	18	62.5	0	1	0	1	1	0	7	7	1	0	0	0	0	0	2	0	0	0	0	0	0	0	0	0	0	38	3
800	3211631012	male	2003	Xi’an University of Technology	Freshman	Science	No	175	128	Rural	General health condition	0	0	2	7	0	7	18	64	1	0	0	0	1	0	7	7	1	0	1	0	1	1	4	0	0	3	0	0	0	1	0	0	4		1
801	3210562015	female	2003	Xi’an University of Technology	Freshman	Science	No	173	142	Urban	In very good health	0	0	6	6	0	6	18	71	0	0	0	0	2	0	6	6	1	0	0	0	1	1	3	1	1	0	0	2	1	0	0	0	5	33	3
802	3210562003	male	2003	Xi’an University of Technology	Freshman	Science	Yes	168	105	Urban	General health condition	0	0	10	6	0	5.5	18	52.5	1	0			2	0	6	6	0.916667	0						2	1	0	1	1	2	1	0	0	8	44	3
803	3210562007	male	2003	Xi’an University of Technology	Freshman	Science	No	172	121	Urban	In very good health	0	0	20	6	0	6	18	60.5	0	1	0	1	2	0	6	6	1	0	0	0	0	0	3	0	0	0	0	0	0	0	0	0	0	27	2
804	3210562008	female	2004	Xi’an University of Technology	Freshman	Science	No	166	92	Urban	General health condition	0	0	30	6	0	5	17	46	2	1	3	2	2	0	6	6	0.833333	1	1	0	4	2	10	1	0	2	2	1	0	2	0	0	8		1
805	3210562021	female	2004	Xi’an University of Technology	Freshman	Humanities and SocialSciences	No	169	120	Rural	In good health	0	0	5	6	0	6	17	60	2	0	0	0	2	0	6	6	1	0	1	0	3	2	7	1	1	0	1	1	1	1	0	0	6	49	1
806	3210562030	male	2003	Xi’an University of Technology	Freshman	Science	No	175	120	Rural	In very good health	0	0	10	6	0	6	18	60	0	0	0	0	2	0	6	6	1	0	0	0	2	1	3	0	0	0	0	0	0	0	0	0	0	43	1
807	3210562009	male	2003	Xi’an University of Technology	Freshman	Science	No	185	130	Rural	In good health	23	0	30	6	0	5	18	65	2	1	0	1	2	23	6	7	0.714286	2	1	0	6	3	11	0	0	0	0	0	1	1	0	0	2	47	1
808	3210562017	male	2002	Xi’an University of Technology	Freshman	Science	No	185	150	Urban	General health condition	0	0	10	6	20	5.5	19	75	1	0	1	1	2	0	6.33333	6.33333	0.868421	0	1	0	2	1	6	0	0	0	0	0	0	0	0	0	0	34	1
809	3210562002	male	2002	Xi’an University of Technology	Freshman	Science	No	183	158	Urban	In good health	23	0	15	6	0	6.5	19	79	1	0	2	1	1	23	6	7	0.928571	0	1	0	3	2	6	1	0	0	0	0	0	0	0	0	1	28	3
810	3210562012	male	2003	Xi’an University of Technology	Freshman	Science	No	188	149	Rural	In very good health	1	0	10	6	0	5	18	74.5	1	0	0	0	2	1	6	5	1	0	0	0	0	0	3	1	0	0	0	1	0	0	0	0	2	37	2
811	3210562006	male	2002	Xi’an University of Technology	Freshman	Science	No	172	130	Urban	In good health	0	0	10	6	0	6	19	65	1	0	0	0	2	0	6	6	1	0	0	0	1	1	4	1	0	0	0	0	0	0	1	0	2	38	1
812	3210562004	male	2002	Xi’an University of Technology	Freshman	Science	No	170	123	Urban	General health condition	23	0	60	6	0	5	19	61.5	2	2	3	3	2	23	6	7	0.714286	2	0	0	6	3	12	0	0	0	0	0	0	0	0	0	0	35	1
813	3210562001	male	2004	Xi’an University of Technology	Freshman	Science	No	178	115	Rural	General health condition	23	0	5	6	0	6	17	57.5	2	0	3	2	2	23	6	7	0.857143	0	1	0	2	1	8	0	0	0	0	0	0	0	0	0	0	32	1
814	3210562022	male	2002	Xi’an University of Technology	Freshman	Science	No	175	122	Rural	In good health	23	0	15	6	0	7	19	61	1	0	1	1	1	23	6	7	1	0	1	0	0	0	4	1	1	1	0	1	0	1	1	0	6	26	1
815	3210562020	male	2000	Xi’an University of Technology	Freshman	Science	No	169	130	Rural	General health condition	23	0	10	7	0	8	21	65	1	0	1	1	0	23	7	8	1	0	0	0	0	0	2	1	0	1	0	0	0	1	0	0	3	34	1
816	3210562024	female	2003	Xi’an University of Technology	Freshman	Science	No	155	110	Rural	In good health	22	0	60	6	0	7	18	55	1	2	2	2	1	22	6	8	0.875	0	1	0	3	2	7	0	1	1	0	0	0	1	1	0	4	51	1
817	3210562031	female	2003	Xi’an University of Technology	Freshman	Science	No	175	115	Rural	In very good health	18	0	4	6	0	6	18	57.5	0	0	0	0	2	18	6	12	0.5	3		0	0	0		0	0	0	0	0	0	0	0	0	0	18	1
818	3210562027	female	2003	Xi’an University of Technology	Freshman	Science	No	165	98	Rural	In good health	23	0	60	6	0	6	18	49	2	2	1	2	2	23	6	7	0.857143	0		0	3	2		0	1	1	1	1	0	1	0	0	5	39	1
819	3210562028	female	2002	Xi’an University of Technology	Freshman		No	137	78	Rural	In poor health	0	0	20	6	0	5	19	39	2	1			2	0	6	6	0.833333	1		0	2	1		1	1	1	1	1	0	0	0	0	5	36	1
820	3210562018	male	2003	Xi’an University of Technology	Freshman	Science	No	172	162	Rural	In poor health	23	30	20	6	20	6	18	81	1	1	1	1	2	23.5	6.33333	6.83333	0.878049	0	1	0	2	1	6	1	1	1	1	1	1	1	1	0	8	41	1
821	3210562023	male	2002	Xi’an University of Technology	Freshman	Science	No	182	134	Rural	General health condition	0	0	15	6	0	5	19	67	0	0	1	1	2	0	6	6	0.833333	1	0	0	4	2	6	1	0	0	1	1	0	0	0	0	3	26	1
822	3210562010	female	2002	Xi’an University of Technology	Freshman	Science	No	163	108	Urban	In good health	0	0	2	6	0	6	19	54	0	0	0	0	2	0	6	6	1	0	0	0	0	0	2	0	0	0	0	0	0	0	0	0	0	21	1
823	3210562025	female	2002	Xi’an University of Technology	Freshman	Science	No	156	108	Urban	General health condition	23	0	5	6	30	7.5	19	54	1	0	0	0	0	23	6.5	7.5	1	0	0	0	0	0	1	0	0	0	1	0	0	1	0	0	2	32	3
824	3210562016	male	2003	Xi’an University of Technology	Freshman	Science	No	170	108	Rural	In good health	0	0	30	6	0	6	18	54	1	1	3	2	2	0	6	6	1	0		0	4	2		0	1	1	1	0	0	0	1	0	4	36	1
825	3210562013	female	2002	Xi’an University of Technology	Freshman	Science	No	160	90	Rural	General health condition	23	0	20	6	0	7	19	45	1	1	2	2	1	23	6	7	1	0	1	0	4	2	7	0	0	0	1	0	1	0	0				1
826	3210562011	female	2003	Xi’an University of Technology	Freshman	Science	No	162	135	Urban	General health condition	0	0	30	6	0	5	18	67.5	1	1	1	1	2	0	6	6	0.833333	1	2	0	5	3	10	2	1	1	3	3	2	3	0	1	16	63	1
827	3210562029	female	2003	Xi’an University of Technology	Freshman	Science	No	157	98	Urban	General health condition	23	0	10	6	0	7	18	49	1	0	0	0	1	23	6	7	1	0	1	0	1	1	4	1	1	0	0	1	0	1	0	1	5	35	1
828	3210562005	female	2003	Xi’an University of Technology	Freshman	Science	No	160	106	Urban	General health condition	0	0	5	6	0	6	18	53	1	0	1	1	2	0	6	6	1	0	0	0	6	3	7	1	1	1	1	1	1	1	0	0	7	52	1
829	3210562026	female	2002	Xi’an University of Technology	Freshman	Science	No	158	100	Rural	In good health	23	0	10	6	0	7	19	50	1	0	1	1	1	23	6	7	1	0	1	0	4	2	6	1	1	1	1	1	1	1	0	0	7	36	1
830	3212241065	female	2003	Xi’an University of Technology	Freshman	Engineering	No	165	104	Urban	General health condition	23	0	30	7	0	7	18	52	1	1	1	1	1	23	7	8	0.875	0	1	0	4	2	6	0	1	0	1	1	0	1	0	0	4	51	3
831	3212241050	male	2003	Xi’an University of Technology	Freshman	Engineering	No	187	154	Urban	In very good health	0	0	2	7	30	6	18	77	0	0	0	0	2	0	7.5	7.5	0.8	1	0	0	0	0	3	0	0	0	0	0	0	0	0	0	0	35	1
832	3212241064	male	2001	Xi’an University of Technology	Freshman	Engineering	No	174	170	Urban	In good health	0	0	30	7	0	7	20	85	0	1	1	1	1	0	7	7	1	0	1	0	2	1	4	0	1	0	0	0	0	0	0	0	1	17	2
833	3212241068	male	2002	Xi’an University of Technology	Freshman	Engineering	No	172	140	Rural	In good health	23	30	10	7	0	10	19	70	0	0	0	0	0	23.5	7	7.5	1.33333	0		0	0	0		0	0	0	0	0	0	1	0	0	1	32	1
834	3212241047	male	2003	Xi’an University of Technology	Freshman	Science	No	165	115	Rural	General health condition	0	0	30	7	0	6	18	57.5	2	1	1	1	2	0	7	7	0.857143	0	1	0	6	3	9	2	2	2	2	2	2	2	2	0	16	52	1
835	3212241040	male	2003	Xi’an University of Technology	Freshman	Engineering	No	179	115	Urban	General health condition	0	0	5	7	0	6	18	57.5	1	0	0	0	2	0	7	7	0.857143	0	0	0	0	0	3	0	0	0	0	0	0	0	0	0	0	17	1
836	3212241043	male	2002	Xi’an University of Technology	Freshman	Engineering	No	183	118	Urban	In good health	22	30	15	7	0	7	19	59	0	0	0	0	1	22.5	7	8.5	0.823529	1	1	0	4	2	5	0	1	0	1	0	0	1	0	0	3	33	3
837	3212241059	female	2003	Xi’an University of Technology	Freshman	Engineering	No	158	85	Urban	In very good health	0	30	60	6	30	5	18	42.5	1	2	1	2	2	0.5	6.5	6	0.833333	1	1	0	2	1	8	0	1	1	1	0	3	1	0	0	7	39	2
838	3212241040	female	2003	Xi’an University of Technology	Freshman	Engineering	No	153	116	Urban	In very good health	23	30	10	7	0	7	18	58	0	0	0	0	1	23.5	7	7.5	0.933333	0	1	0	0	0	2	0	0	0	0	0	0	0	0	0	0	22	1
839	3212241063	male	2003	Xi’an University of Technology	Freshman	Engineering	No	192	200	Urban	In good health	0	0	20	7	0	6	18	100	1	1	2	2	2	0	7	7	0.857143	0	1	0	2	1	7	0	0	0	0	0	0	0	0	0	0	34	1
840	3212241069	male	2003	Xi’an University of Technology	Freshman	Humanities and SocialSciences	No	175	130	Urban	In good health	23	30	10	6	0	7	18	65	0	0	0	0	1	23.5	6	6.5	1.07692	0	1	0	0	0	2	1	0	0	0	0	0	0	0	0	1		3
841	3212241041	female	2002	Xi’an University of Technology	Freshman	Engineering	No	161	98	Urban	In very good health	23	0	5	7	0	6	19	49	0	0	0	0	2	23	7	8	0.75	1	0	0	3	2	5	0	0	0	0	0	0	0	0	0	0	40	1
842	3212241054	male	2003	Xi’an University of Technology	Freshman	Engineering	No	172	120	Rural	In good health	23	0	10	6	30	6	18	60	1	0	1	1	2	23	6.5	7.5	0.8	1	1	0	0	0	6	0	0	0	0	0	0	0	0	0	0	33	1
843	3212241060	male	2003	Xi’an University of Technology	Freshman	Engineering	No	171	124	Urban	In very good health	0	30	5	7	0	7	18	62	1	0	0	0	1	0.5	7	6.5	1.07692	0	1	0	1	1	4	1	0	0	0	1	1	0	0	0	3		3
844	3212241061	female	2002	Xi’an University of Technology	Freshman	Engineering	No	164	148	Urban	In very good health	0	0	5	7	0	6	19	74	0	0	0	0	2	0	7	7	0.857143	0	0	0	3	2	4	0	0	1	1	1	1	1	0	0	5	36	1
845	3212241055	male	2003	Xi’an University of Technology	Freshman	Engineering	No	180	135	Urban	In poor health	0	0	30	7	0	6	18	67.5	1	1	3	2	2	0	7	7	0.857143	0	1	0	3	2	8	1	0	0	1	0	1	0	0	0	3	40	1
846	3212241053	male	2002	Xi’an University of Technology	Freshman	Engineering	No	174	189	Rural	In poor health	2	0	1	7	30	6	19	94.5	2	0	0	0	2	2	7.5	5.5	1.09091	0	0	0	2	1	5	0	0	0	0	0	0	0	0	0	0		1
847	3212241070	male	2002	Xi’an University of Technology	Freshman	Engineering	No	180	151	Urban	In good health	0	0	30	7	0	6	19	75.5	1	1	2	2	2	0	7	7	0.857143	0	1	0	2	1	7	0	0	0	0	0	0	0	0	0	0	20	1
848	3212251058	male	2002	Xi’an University of Technology	Freshman	Engineering	No	181	156	Urban	In good health	0	0	10	6	0	5	19	78	2	0	0	0	2	0	6	6	0.833333	1	1	0	2	1	7	1	0	0	0	0	1	1	0	0	3	48	3
849	3212241062	male	2002	Xi’an University of Technology	Freshman	Engineering	No	182	140	Urban	In very good health	0	0	5	6	0	6	19	70	0	0	0	0	2	0	6	6	1	0	0	0	0	0	2	0	0	0	0	0	0	0	0	0	0	17	3
850		male	2003	Xi’an University of Technology	Freshman	Engineering	No	178	135	Urban	General health condition	0	0	0	7	0	7	18	67.5	2	0	1	1	1	0	7	7	1	0	2	0	2	1	7	1	0	1	2	1	0	1	0	0	6		1
851	3212241051	female	2001	Xi’an University of Technology	Freshman	Engineering	No	175	135	Urban	In good health	23	0	10	8	0	9	20	67.5	0	0	1	1	0	23	8	9	1	0	1	0	6	3	5	2	2	1	1	0	3	1	0	0	10	49	3
852	3212241049	female	2003	Xi’an University of Technology	Freshman	Engineering	No	190	150	Urban	General health condition	23	0	10	7	0	9	18	75	1	0	0	0	0	23	7	8	1.125	0	1	0	0	0	2	0	0	0	0	0	0	0	0	0	0	17	3
853	3212241052	male	2003	Xi’an University of Technology	Freshman	Science	No	180	160	Urban	In good health	0	0	20	7	0	6	18	80	1	1	0	1	2	0	7	7	0.857143	0	0	0	0	0	4	0	0	0	0	0	0	0	0	0	0	21	3
854	3212211023	male	2002	Xi’an University of Technology	Freshman	Engineering	No	170	140	Urban	In good health	0	0	30	7	0	8	19	70	0	1	0	1	0	0	7	7	1.14286	0	0	0	0	0	1	0	0	0	0	0	0	0	0	0	0	17	3
855	3201712277	male	2001	Xi’an University of Technology	Sophomore	Science	No	176	100	Urban	In very poor health	0	0	10	7	50	7	20	50	3	0	3	2	1	0	7.83333	7.83333	0.893617	0	2	0	6	3	11	3	3	3	3	3	3	3	3	3	27	22	1
856	3201712296			Xi’an University of Technology	Sophomore	Engineering	No	181	128	Urban	In very good health	0	30	40	7	20	6		64	3	2	3	3	2	0.5	7.33333	6.83333	0.878049	0		0	2	1		0	0	1		0	0	0	0	0			2
857	3210243031	male	2003	Xi’an University of Technology	Freshman	Engineering	No	178	120	Urban	General health condition	0	30	5	5	59	5	18	60	1	0	0	0	2	0.5	5.98333	5.48333	0.911854	0	1	0	6	3	7	1	1	0	1	0	0	0	0	0	3	27	2
858	3201621069	female	2001	Xi’an University of Technology	Sophomore	Engineering	No	165	96	Urban	In good health	0	0	20	8	0	7	20	48	1	1	0	1	1	0	8	8	0.875	0	1	0	1	1	5	1	2		1	1	2	2	0	0			3
859	3190521103	female	2001	Xi’an University of Technology	Junior	Science	No	173	120	Urban	In good health	23	0	10	7	0	7.5	20	60	0	0	0	0	0	23	7	8	0.9375	0	1	0	4	2	3	1	1	1	1	0	1	1	0	0	6	33	2
860	3201621029	female	2001	Xi’an University of Technology	Sophomore	Science	No	163	100	Rural	In good health	0	0	30	7	0	6	20	50	1	1	1	1	2	0	7	7	0.857143	0	2	0	3	2	8	1	0	1	2		1	1	2	0		38	1
861	3190521051	female	2001	Xi’an University of Technology	Junior	Science	No	165	120	Rural	General health condition	23	0	30	7	0	6	20	60	1	1	1	1	2	23	7	8	0.75	1	1	0	3	2	8	1	1	1	1	0	1	1	0	0	6	45	1
862	3200531042	male	2001	Xi’an University of Technology	Sophomore	Science	No	173	130	Urban	In good health	0	0	10	7	0	6.5	20	65	1	0	0	0	1	0	7	7	0.928571	0	1	0	3	2	5	0	0	0	0	0	0	0	0	0	0	27	1
863	3212241044	male	2003	Xi’an University of Technology	Freshman	Engineering	No	171	140	Urban	General health condition	23	0	10	7	0	8	18	70	1	0	2	1	0	23	7	8	1	0	1	0	2	1	4	0	0	1	1	1	1	1	1	0	6	58	1
864	3212241056	female	2002	Xi’an University of Technology	Freshman	Engineering	No	162	94	Rural	General health condition	1	0	30	7	0	5	19	47	2	1	3	2	2	1	7	6	0.833333	1	1	0	6	3	11	1	0	1	1	1	0	2	0	0	6	17	1
865	3211631016	male	2003	Xi’an University of Technology	Freshman	Engineering		168	110	Rural	In poor health			20	7	0	7	18	55	1	1	0	1	1		7				1	0	2	1		0	0	0	0	0	0	0	0	0	0	17	1
866	3212241057	female	2004	Xi’an University of Technology	Freshman	Engineering	No	157	88	Urban	General health condition	22	0	1	8	0	8	17	44	1	0	0	0	0	22	8	10	0.8	1	1	3	6	3	9	1	0	0	0	2	0	0	2	0	5	17	3
867	3212211024	male	2003	Xi’an University of Technology	Freshman	Engineering	No	181	130	Urban	In good health	0	0	30	7	0	6	18	65	1	1	2	2	2	0	7	7	0.857143	0	1	0	2	1	7	0	0	0	0	0	0	0	0	0	0		3
868	3202211018	male	2002	Xi’an University of Technology	Freshman	Engineering	No	188	126	Urban	In good health	0	0	10	7	0	7	19	63	1	0	1	1	1	0	7	7	1	0	0	0	0	0	3	0	0	0	0	0	0	0	0	0	0	48	1
869	3211631013	male	2002	Xi’an University of Technology	Freshman	Engineering	No	175	116	Urban	In very good health	23	0	60	7	0	7	19	58	1	2	1	2	1	23	7	8	0.875	0	0	0	1	1	5	0	0	0	0	0	0	0	0	0	0	17	3
870	3211621106	male	2003	Xi’an University of Technology	Freshman	Engineering	No	178	180	Urban	General health condition	0	0	2	7	0	7	18	90	0	0	0	0	1	0	7	7	1	0	0	0	0	0	1	0	0	0	0	0	0	0	0	0	0	18	3
871	3211631020	male	2003	Xi’an University of Technology	Freshman	Engineering	No	178	126	Rural	In good health	0	0	5	7	0	7	18	63	0	0	0	0	1	0	7	7	1	0	0	0	0	0	1	0	0	0	0	0	1	1	0	0	2	29	1
872	3211621066	male	2002	Xi’an University of Technology	Freshman	Engineering	No	173	118	Rural	General health condition	0	0	10	7	0	7	19	59	0	0	0	0	1	0	7	7	1	0		0	0	0		0	0	0	0	0	0	1	1	0	2	20	3
873	3211631002	male	2003	Xi’an University of Technology	Freshman	Engineering	No	180	140	Rural	General health condition	0	0	10	7	0	7	18	70	1	0	1	1	1	0	7	7	1	0	1	0	3	2	6	0	0	0	0	0	0	0	0	0	0	17	1
874	3211631005	male	2002	Xi’an University of Technology	Freshman	Engineering	No	175	110	Rural	In good health	0	0	30	7	0	6	19	55	1	1	0	1	2	0	7	7	0.857143	0	0	0	0	0	4	0	0	0	1	1	0	0	0	0	2	25	1
875	3211631003	female	2002	Xi’an University of Technology	Freshman	Engineering	No	163	96	Rural	In good health	23	0	20	7	0	8	19	48	1	1	2	2	0	23	7	8	1	0	1	0	4	2	6	1	1	1	1	1	1	1	1	0	8	43	1
876	3211621073	male	2002	Xi’an University of Technology	Freshman	Science	No	172	114	Urban	General health condition	0	0	5	6	30	6	19	57	1	0	1	1	2	0	6.5	6.5	0.923077	0	1	0	3	2	7	3	2	1	1	1	1	1	1	0	11	50	1
877	3211632015	male	2003	Xi’an University of Technology	Freshman	Engineering	No	174	156	Rural	In good health	23	0	10	7	0	7	18	78	1	0	0	0	1	23	7	8	0.875	0	0	0	0	0	2	0	0	0	0	0	0	0	0	0	0	17	1
878	3211631018	male	2002	Xi’an University of Technology	Freshman	Engineering	No	171	120	Rural	In good health	0	0	3	7	0	7	19	60		0	0	0	1	0	7	7	1	0	1	0	1	1		0	0	0	1	1	0	0	0	0	2	24	1
879	2020030413	male	2001	Xi’an Technological University	Sophomore	Engineering	No	175	140	Rural	In good health	0	0	40	8	0	7	20	70	1	2	1	2	1	0	8	8	0.875	0	1	0	0	0	5	0	0	1	0	0	0	1	1	0	3		1
880	2020030421	male	2003	Xi’an Technological University	Sophomore	Engineering	No	170	120	Rural	In good health	1	0	10	8	0	7	18	60	1	0	0	0	1	1	8	7	1	0	1	0	0	0	3	1	0	0	0	0	0	0	0	0	1	19	1
881	2020030420	male	2002	Xi’an Technological University	Sophomore	Engineering	No	172	132	Urban	In good health	0	0	10	8	0	10	19	66	0	0	0	0	0	0	8	8	1.25	0	1	0	0	0	1	0	0	0	0	0	0	0	0	0	0	17	1
882	2020031730	male	2001	Xi’an Technological University	Sophomore	Engineering	No	173	112	Rural	In good health	23	0	30	9	0	8	20	56	2	1	1	1	0	23	9	10	0.8	1		0	1	1		0	0	0	0	0	0	0	0	0	0	18	1
883	2020032476	male	2001	Xi’an Technological University	Sophomore	Humanities and SocialSciences	No	168	190	Rural	In good health	0	0	10	7	0	7	20	95	0	0	0	0	1	0	7	7	1	0	1	0	1	1	3	0	0	1	1	1	0	1	0	0	4		1
884	2020033454	male	2002	Xi’an Technological University	Sophomore	Engineering	No	169	120	Rural	General health condition	0	0	10	7	30	7	19	60	2	0	0	0	1	0	7.5	7.5	0.933333	0	1	0	1	1	5	0	0	1	1	0	1	0	0	0	3	24	1
885	2020033294	male	2002	Xi’an Technological University	Sophomore	Science	No	170	120	Rural	In poor health	2	0	10	7	0	5	19	60	1	0	2	1	2	2	7	5	1	0	1	0	4	2	7	1	1	3	3	2	1	2	1	2	16	80	1
886	2020033140	male	2002	Xi’an Technological University	Sophomore	Engineering	No	180	108	Urban	General health condition	0	0	5	7	0	7	19	54	0	0	0	0	1	0	7	7	1	0	0	0	0	0	1	3	0	0	0	0	1	1	0	0	5	23	3
887	2020033637	male	2000	Xi’an Technological University	Sophomore	Humanities and SocialSciences	No	181	178	Rural	In good health	0	0	15	8	0	7	21	89	1	0	1	1	1	0	8	8	0.875	0	1	0	2	1	5	0	1	1	1	0	1	0	0	0	4		1
888	2020033248	male	2002	Xi’an Technological University	Sophomore	Engineering	No	171	123	Urban	General health condition	0	0	5	8	0	7	19	61.5	1	0	0	0	1	0	8	8	0.875	0	0	0	0	0	2	1	0	1	0	0	0	0	0	0	2	18	2
889	2020033292	male	2002	Xi’an Technological University	Sophomore	Engineering	No	185	175	Urban	In good health	0	0	30	9	0	8	19	87.5	0	1	0	1	0	0	9	9	0.888889	0	0	0	0	0	1	0	0	0	0	1	0	0	0	0	1	31	3
890	2020032369	male	2002	Xi’an Technological University	Sophomore	Engineering	No	170	144	Urban	General health condition	0	0	3	7	0	6	19	72	2	0	0	0	2	0	7	7	0.857143	0	1	0	0	0	5	1	0	0	1	2	1	0	0	1	6		3
891	2020030423	male	2001	Xi’an Technological University	Sophomore	Engineering	No	170	110	Rural	In good health	0	0	10	7	0	6	20	55	1	0	1	1	2	0	7	7	0.857143	0	1	0	0	0	5	0	0	0	0	1	0	0	0	0	1	43	1
892	2020033518	male	2002	Xi’an Technological University	Sophomore	Engineering	No	175	110	Urban	In poor health	23	0	20	8	0	8	19	55	2	1	0	1	0	23	8	9	0.888889	0	0	0	0	0	3	0	0	0	0	0	0	1	0	0	1	38	1
893		male	2002	Xi’an Technological University	Sophomore	Science	No	183	140	Urban	In very good health							19	70			0								0	0	0	0		1	1	1	1	1	1	1	1	1	9	51	3
894	2020033343	male	2001	Xi’an Technological University	Sophomore	Science	No	183	130	Rural	General health condition	0	0	30	9	0	8	20	65	1	1	1	1	0	0	9	9	0.888889	0	1	0	4	2	5	0	0	0	1		0	1	0	0		22	1
895	2020032474	male	2001	Xi’an Technological University	Sophomore	Humanities and SocialSciences	No	168	134	Rural	General health condition	23	0	20	8	0	7	20	67	1	1	0	1	1	23	8	9	0.777778	1	2	0	3	2	8	0	1	1	1	2	1	1	0	0	7		1
896	2020033465	male	2001	Xi’an Technological University	Sophomore	Engineering	No	170	110	Urban	General health condition	0	0	30	8	0	8	20	55	1	1	1	1	0	0	8	8	1	0	1	0	2	1	4	1	1	1	1	1	0	1	1	0	7	34	3
897	2020031725	male	2000	Xi’an Technological University	Sophomore	Engineering	No	178	180	Urban	In good health	0	30	5	9	0	8	21	90	1	0	0	0	0	0.5	9	8.5	0.941176	0	1	0	3	2	4	0	0	0	0	0	0	0	0	0	0	24	2
898	2020033406	male	2001	Xi’an Technological University	Sophomore	Engineering	No	172	134	Urban	General health condition	1	0	15	9	0	8	20	67	1	0	0	0	0	1	9	8	1	0	1	0	2	1	3	1	1	1	1	0	0	1	0	0	5	33	1
899	2020033290	male	2002	Xi’an Technological University	Sophomore	Engineering	No	175	121	Rural	General health condition	23	0	10	8	0	7	19	60.5	1	0	0	0	1	23	8	9	0.777778	1	1	0	0	0	4	0	0	0	0	0	0	0	0	0	0	25	1
900	2020033661	female	2002	Xi’an Technological University	Sophomore	Humanities and SocialSciences	No	172	120	Urban	In good health	0	0	30	9	0	7	19	60	2	1	2	2	1	0	9	9	0.777778	1	1	1	2	1	9	0	0	0	0	0	0	0	0	0	0	45	3
901	2020033588	female	2000	Xi’an Technological University	Sophomore	Humanities and SocialSciences	No	158	100	Rural	In poor health	23	0	30	8	0	9	21	50		1	1	1	0	23	8	9	1	0	1	0	1	1												54	1
902	2020033602	female	2000	Xi’an Technological University	Sophomore	Humanities and SocialSciences	No	162	100	Urban	In good health	23	0	15	7	0	7	21	50	1	0	1	1	1	23	7	8	0.875	0	2	0	4	2	7	1	1	1	1	1	1	1	1	1	9		3
903	2020033524	male	2001	Xi’an Technological University	Sophomore	Science	No	186	136	Urban	In good health	22	0	30	7	0	7	20	68	1	1	2	2	1	22	7	9	0.777778	1	1	0	2	1	7	1	1	1	1	1	0	0	0	0	5	27	3
904	2020033407	male	2001	Xi’an Technological University	Sophomore	Engineering	No	180	160	Rural	General health condition	1	0	30	8	0	8	20	80		1	3	2	0	1	8	7	1.14286	0						1	0	1	1	1	0	0	0	0	4	38	1
905	2020033386	male	2001	Xi’an Technological University	Sophomore	Engineering	No	186	160	Urban	General health condition	0	0	10	7	0	7	20	80	0	0	0	0	1	0	7	7	1	0	1	0	2	1	3	1	0	0	1	0	1	1	0	0	4		1
906	2020033425	male	2002	Xi’an Technological University	Sophomore	Engineering	No	173	138	Rural	General health condition	0	0	20	7	0	6	19	69	1	1	2	2	2	0	7	7	0.857143	0	1	0	0	0	6	1	1	1	1	1	1	1	1	1	9	34	1
907	2020033426	male	2002	Xi’an Technological University	Sophomore	Science	No	180	125	Rural	General health condition	0	0	10	7	0	7	19	62.5	1	0	0	0	1	0	7	7	1	0	0	0	2	1	3	0	0	0	0	0	0	1	0	0	1	48	1
908	2020033427	male	2002	Xi’an Technological University	Sophomore	Engineering	No	180	152	Urban	In good health	0	0	10	9	0	6	19	76	1	0	0	0	2	0	9	9	0.666667	2	1	0	2	1	7	1	0	0	0	1	0	1	0	0	3	35	1
909	2020033431	male	2002	Xi’an Technological University	Sophomore	Engineering	No	173	162	Rural	In good health	0	0	20	8	0	7	19	81	1	1	2	2	1	0	8	8	0.875	0	1	0	1	1	6	1	1	1	1	0	0	1	0	0	5	46	1
910	2020033417	male	2002	Xi’an Technological University	Sophomore	Engineering	No	184	129	Urban	In good health	0	0	30	8	0	7	19	64.5	0	1	3	2	1	0	8	8	0.875	0	1	0	4	2	6	1	1	2	0	3	1	2	1	0	11	32	1
911	2020031726	male	2002	Xi’an Technological University	Sophomore	Engineering	No	170	102	Urban	In good health	0	0	2	8	0	8	19	51	0	0	0	0	0	0	8	8	1	0	0	0	0	0	0	0	0	0	0	0	0	0	0	0	0	17	1
912	2020030451	male	2000	Xi’an Technological University	Sophomore	Engineering	No	175	144	Urban	General health condition	1	0	40	8	0	6	21	72	2	2	1	2	2	1	8	7	0.857143	0	1	0	2	1	8	1	1	0	1	1	1	1	1	0	7	38	3
913	2020033405	male	2002	Xi’an Technological University	Sophomore	Engineering	No	175	130	Rural	In good health	0	0	10	7	30	8	19	65	1	0	1	1	0	0	7.5	7.5	1.06667	0	1	0	0	0	3	0	0	0	0	0	0	0	0	0	0	21	1
914	2020033409	male	2001	Xi’an Technological University	Sophomore	Engineering	No	171	134	Urban	In very good health	0	0	10	8	0	7	20	67	0	0	0	0	1	0	8	8	0.875	0	1	0	0	0	2	0	0	0	0	0	0	0	0	0	0	26	3
915	2020033401	male	2002	Xi’an Technological University	Sophomore	Engineering	No	174	162	Urban	General health condition	23	0	30	9	0	6	19	81	2	1	2	2	2	23	9	10	0.6	3	1	0	4	2	12	2	1	2	2	2	1	1	0	0	11		3
916	2020033403	male	2002	Xi’an Technological University	Sophomore	Engineering	No	178	130	Urban	General health condition	0	30	15	8	0	7	19	65	1	0	2	1	1	0.5	8	7.5	0.933333	0	1	1	0	0	5	1	1	0	0	0	1	1	0	0	4	31	2
917	202003343	male	2002	Xi’an Technological University	Sophomore	Engineering	No	177	190	Urban	General health condition	23	0	30	7	0	6	19	95	1	1	1	1	2	23	7	8	0.75	1	1	0	1	1	7	1	0	1	0	0	1	0	0	0	3	40	2
918	2021030975	male	2003	Xi’an Technological University	Freshman	Engineering	No	172	100	Rural	General health condition	0	0	60	8	0	7	18	50	1	2	3	3	1	0	8	8	0.875	0	0	0	6	3	8	1	1	3	2	1	1	2	1	0	12	45	1
919	2021032532	male	2002	Xi’an Technological University	Freshman	Engineering	No	172	176	Urban	In poor health	0	0	10	7	30	7	19	88	0	0	0	0	1	0	7.5	7.5	0.933333	0	1	0	0	0	2	0	0	0	0	0	0	0	0	0	0	44	1
920	2021032533	male	2002	Xi’an Technological University	Freshman	Engineering	No	174	140	Urban	General health condition	23	30	10	7	30	7	19	70	1	0	1	1	1	23.5	7.5	8	0.875	0	1	0	3	2	6	0	0	0	0	0	0	0	0	0	0	21	1
921	2021031599	female	2001	Xi’an Technological University	Freshman	Engineering	No	163	92	Rural	In good health	0	0	10	7	0	7	20	46	1	0	1	1	1	0	7	7	1	0	1	0	4	2	6	1	1	0	2	2	0	0	1	0	7	32	1
922	2021031598	female	2003	Xi’an Technological University	Freshman	Engineering	No	154	108	Rural	In poor health	0	0	10	7	0	6	18	54	1	0	1	1	2	0	7	7	0.857143	0	0	0	0	0	4	0	0	0	0	0	0	0	0	0	0	17	1
923	2021033384	male	2002	Xi’an Technological University	Freshman	Engineering	No	175	125	Rural	In good health	23	0	20	7	0	7	19	62.5	1	1	1	1	1	23	7	8	0.875	0	1	0	2	1	5	1	0	0	1	0	0	1	0	0	3	24	1
924	2021031217	male	2003	Xi’an Technological University	Freshman	Engineering	No	175	116	Rural	General health condition	23	0	30	8	0	7	18	58	1	1	3	2	1	23	8	9	0.777778	1	0	0	2	1	6	2	1	0	1	0	0	1	0	0	5	47	1
925	2021032313	male	2003	Xi’an Technological University	Freshman	Humanities and SocialSciences	No	170	150	Rural	General health condition	23	0	5	7	0	8	18	75	1	0	0	0	0	23	7	8	1	0	1	0	2	1	3	0	0	0	1	0	0	0	0	0	1	29	1
926	2021032548	female	2003	Xi’an Technological University	Freshman	Science	No	154	107	Rural	General health condition	0	0	10	7	0	6	18	53.5	1	0	0	0	2	0	7	7	0.857143	0	1	0	4	2	6	0	1	0	1	1	0	1	0	0	4	55	1
927	2021033828	female	2001	Xi’an Technological University	Freshman	Science	No	162	114	Rural	In good health	23	0	10	7	0	8	20	57	1	0	1	1	0	23	7	8	1	0	1	0	2	1	4	1	1	1	1	0	1	1	0	0	6	26	1
928	2021030965	male	2003	Xi’an Technological University	Freshman	Engineering	No	179	132	Rural	In good health	23	0	5	7	0	8	18	66	1	0	0	0	0	23	7	8	1	0	1	0	1	1	3	0	0	0	1	1	0	0	0	0	2	29	1
929	2021033103	female	2002	Xi’an Technological University	Freshman	Engineering	No	162	120	Rural	General health condition	0	0	10	9	0	7	19	60	0	0	0	0	1	0	9	9	0.777778	1	1	0	2	1	4	1	1	2	0	0	0	1	0	0	5	41	1
930	2021033105	female	2003	Xi’an Technological University	Freshman	Engineering	No	160	96	Rural	In good health	0	0	30	7	0	8	18	48	2	1	2	2	0	0	7	7	1.14286	0	2	0	2	1	7	2	1	2	2	1	1	1	2	0	12	55	1
931	2021030572	male	2003	Xi’an Technological University	Freshman	Engineering	No	176	100	Urban	General health condition	23	0	30	7	0	7	18	50	2	1	2	2	1	23	7	8	0.875	0	2	0	6	3	10	2	2	2	2	0	2	1	0	0	11	61	1
932	2021031220	male	2002	Xi’an Technological University	Freshman	Engineering	No	160	106	Rural	General health condition	1	0	120	8	0	6	19	53	2	3	3	3	2	1	8	7	0.857143	0	1	0	4	2	10	2	2	2	2	0	1	2	2	0	13	33	1
933	2021033808	male	2002	Xi’an Technological University	Freshman	Science	No	168	116	Rural	General health condition	0	0	30	7	0	6	19	58	2	1	3	2	2	0	7	7	0.857143	0	2	0	6	3	11	1	1	2	1	1	0	2	0	0	8	56	1
934	2021031822	male	2003	Xi’an Technological University	Freshman	Science	No	185	123	Rural	General health condition	22	0	20	9	0	8	18	61.5	1	1	1	1	0	22	9	11	0.727273	2	2	0	5	3	9	1	1	2	1	0	0	1	2	0	8	48	1
935	2021032372	male	2003	Xi’an Technological University	Freshman	Humanities and SocialSciences	No	183	103	Urban	General health condition	0	0	30	8	0	6	18	51.5	2	1	2	2	2	0	8	8	0.75	1	2	0	5	3	12	1	1	1	1	1	0	1	1	0	7	49	1
936	2021031137	male	2002	Xi’an Technological University	Freshman	Engineering	No	174	132	Rural	In very good health	23	0	40	7	0	7	19	66	0	2	2	2	1	23	7	8	0.875	0	1	0	4	2	6	0	0	0	0	1	0	1	0	0	2	38	1
937	2021032662	male	2002	Xi’an Technological University	Freshman	Engineering	No	160	136	Urban	In good health	0	0	15	7	0	7	19	68	1	0	1	1	1	0	7	7	1	0	1	0	2	1	5	0	1	0	1	1	0	1	0	0	4	39	1
938	2021032201	male	2003	Xi’an Technological University	Freshman	Humanities and SocialSciences	No	170	105	Rural	In good health	0	0	15	8	0	8	18	52.5	1	0	1	1	0	0	8	8	1	0	1	0	0	0	3	1	1	0	0	1	1	1	0	1	6	23	1
939	2021032882	male	2003	Xi’an Technological University	Freshman	Engineering	No	179	126	Rural	In good health	1	0	20	7	40	6	18	63	2	1	0	1	2	1	7.66667	6.66667	0.9	0	0	0	4	2	7	1	1	0	0	1	0	0	0	0	3	56	1
940	2021032599	male	2002	Xi’an Technological University	Freshman	Engineering	No	178	140	Urban	General health condition	0	0	5	7	30	8	19	70	0	0	0	0	0	0	7.5	7.5	1.06667	0	1	0	0	0	1	3	0	0	1	1	0	0	0	0	5	18	3
941	2021033792	male	2002	Xi’an Technological University	Freshman	Science	No	180	140	Rural	In good health	23	0	10	6	30	7	19	70	1	0	0	0	1	23	6.5	7.5	0.933333	0	0	0	2	1	3	1	0	0	0	0	0	1	0	0	2	35	1
942	2021030884	male	2002	Xi’an Technological University	Freshman	Engineering	No	173	250	Urban	In poor health	0	0	30	8	0	7	19	125	1	1	3	2	1	0	8	8	0.875	0	2	0	6	3	9	2	2	3	3	2	1	3	0	0	16	52	1
943	2021030623	male	2002	Xi’an Technological University	Freshman	Engineering	No	163	101	Rural	In very good health	23	0	20	7	0	7	19	50.5	1	1	0	1	1	23	7	8	0.875	0	1	0	0	0	4	0	0	0	0	1		0	0	0		25	1
944	2021030565	male	2002	Xi’an Technological University	Freshman	Engineering	No	171	135	Rural	General health condition	0	0	10	8	0	7	19	67.5	0	0	0	0	1	0	8	8	0.875	0	1	0	1	1	3	0	0	0	1	1	0	0	0	0	2	25	1
945	2021032664	male	2003	Xi’an Technological University	Freshman	Engineering	No	172	106	Rural	General health condition	23	0	30	7	0	7	18	53	1	1	0	1	1	23	7	8	0.875	0	1	0	2	1	5	0	0	0	0	1	1	1	0	0	3	28	1
946	2021031290	male	2002	Xi’an Technological University	Freshman	Engineering	No	174	165	Rural	General health condition	1	0	10	8	0	7	19	82.5	3	0	1	1	1	1	8	7	1	0	1	0	6	3	9	2	1	1	2	1	0	1	0	0	8	36	1
947	20210312	male	2003	Xi’an Technological University	Freshman	Engineering	No	179	175	Rural	In good health	23	0	3	7	0	8	18	87.5	0	0	0	0	0	23	7	8	1	0	1	0	0	0	1	0	1	0	0	0	1	1	0	0	3	37	1
948	2021031262	male	2003	Xi’an Technological University	Freshman	Engineering	No	165	136	Rural	General health condition	0	0	30	8	0	7.5	18	68	1	1	3	2	0	0	8	8	0.9375	0	1	0	4	2	6	2	2	2	2	2	2	2	2	2	18	58	1
949	2021030561	male	2002	Xi’an Technological University	Freshman	Engineering	No	178	106	Rural	In good health	23	0	15	7	0	7	19	53	1	0	1	1	1	23	7	8	0.875	0	1	0	0	0	4	1	0	0	0	1	0	0	0	0	2	35	1
950	2021030559	male	2002	Xi’an Technological University	Freshman	Engineering	No	176	150	Rural	General health condition	0	0	5	7	0	6	19	75	1	0	1	1	2	0	7	7	0.857143	0	1	0	6	3	8	1	0	1	1	0	0	0	0	0	3	55	1
951	2021030635	male	2003	Xi’an Technological University	Freshman	Engineering		165	115	Urban	In good health	23	0	60	8	0	7	18	57.5	1	2	3	3	1	23	8	9	0.777778	1	1	0	5	3	10	0	1	1	1	0	2	1	0	1	7	33	1
952	2021031219	male	2003	Xi’an Technological University	Freshman	Engineering	No	185	120	Rural	In good health	23	0	30	7	0	6.5	18	60	1	1	1	1	1	23	7	8	0.8125	1	1	0	0	0	5	1	1	0	0	0	0	0	0	0	2	38	1
953	2021030560	male	2003	Xi’an Technological University	Freshman	Engineering	No	174	112	Rural	In good health	23	0	30	7	0	8	18	56	0	1	1	1	0	23	7	8	1	0	1	0	0	0	2	0	1	0	0	0	0	1	0	0	2	46	1
954	2021030434	male	2002	Xi’an Technological University	Freshman	Science	No	180	131	Rural	General health condition	23	0	20	7	0	7	19	65.5	1	1	2	2	1	23	7	8	0.875	0	1	0	4	2	7	1	1	1	1	2	1	2	1	1	11	41	1
955	2021030430	male	2001	Xi’an Technological University	Freshman	Science	No	172	108	Rural	In good health	23	0	1	7	0	8	20	54	1	0	0	0	0	23	7	8	1	0	1	0	0	0	2	0	0	0	1	0	0	0	0	0	1	25	1
956	2021033102	female	2003	Xi’an Technological University	Freshman	Engineering	No	168	93	Rural	General health condition	22	30	10	7	30	9	18	46.5	1	0	0	0	0	22.5	7.5	9	1	0	1	0	2	1	3	1	1	0	1	2	0	0	0	0	5	29	1
957	2021033101	female	2003	Xi’an Technological University	Freshman	Engineering	No	158	86	Rural	General health condition	23	0	5	7	0	7	18	43	1	0	0	0	1	23	7	8	0.875	0	1	0	2	1	4	0	0	0	1		0	0	0	0		45	1
958	2021030809	male	2003	Xi’an Technological University	Freshman	Engineering	No	172	120	Rural	In good health	23	0	10	8	0	8	18	60	1	0	0	0	0	23	8	9	0.888889	0	1	0	2	1	3	0	0	0	0	0	0	0	0	0	0	24	1
959	1905020610	male	2001	Xi’an Technological University	Junior	Humanities and SocialSciences	No	182	141	Rural	In very good health	0	0	10	7	40	7.5	20	70.5	0	0	0	0	0	0	7.66667	7.66667	0.978261	0	0	0	0	0	0	1	1	0	0	0	1	0	0	0	3	27	3
960	2021030981	male	2004	Xi’an Technological University	Freshman	Engineering	No	176	138	Urban	In poor health	23	0	15	7	0	7	17	69	1	0	1	1	1	23	7	8	0.875	0	1	0	0	0	4	0	0	0	0	0	0	0	0	0	0	23	1
961	2021031492	male	2003	Xi’an Technological University	Freshman	Engineering	No	185	175	Urban	In good health	0	0	20	7	30	7	18	87.5	1	1	0	1	1	0	7.5	7.5	0.933333	0	0	0	0	0	3	1	1	1	0	0	0	0	0	0	3	17	1
962	2021030813	male	2002	Xi’an Technological University	Freshman	Engineering	No	170	124	Rural	In very good health	23	0	15	7	0	7	19	62	0	0	0	0	1	23	7	8	0.875	0	0	0	0	0	1	0	0	0	0	0	0	0	0	0	0	42	1
963	2021031138	male	2003	Xi’an Technological University	Freshman	Engineering	No	180	158	Rural	In good health	23	0	10	7	0	8	18	79	1	0	0	0	0	23	7	8	1	0	0	0	0	0	1	0	0	0	0	0	0	0	0	0	0	17	1
964	2021031143	male	2001	Xi’an Technological University	Freshman	Engineering	No	178	166	Rural	In very good health	0	0	10	7	0	7	20	83	1	0	0	0	1	0	7	7	1	0	0	0	0	0	2	0	0	0	0	0	0	0	0	0	0	21	1
965	2021030953	male	2004	Xi’an Technological University	Freshman	Engineering	No	173	146	Rural	General health condition	23	0	20	8	0	6	17	73	1	1	1	1	2	23	8	9	0.666667	2	1	0	0	0	7	1	1	0	1	0	1	1	0	0	5	26	1
966	2021033869	male	2002	Xi’an Technological University	Freshman	Science	No	165	220	Rural	In good health	22	0	20	7	0	9	19	110	0	1	0	1	0	22	7	9	1	0	0	0	0	0	1	0	0	0	0	0	0	0	0	0	0	32	1
967	1099100016	female	2003	Xidian University	Freshman	Humanities and SocialSciences	No	170	112	Urban	In good health	1	0	30	8	0	6	18	56	0	1	0	1	2	1	8	7	0.857143	0	1	0	3	2	6	1	2	0	1	0	3	0	0	1	8	41	3
968	1009101366	male	2004	Xidian University	Freshman	Engineering	No	173	116	Rural	In poor health	23	0	20	8	0	8	17	58	2	1	0	1	0	23	8	9	0.888889	0	1	0	5	3	7	1	1	0	1	0	2	2	0	0	7	63	1
969	81212647	female	1997	Xidian University	Master	Humanities and SocialSciences	Yes	172	130	Rural	General health condition	23	50	20	7	0	7	24	65	0	1	0	1	1	23.8333	7	7.16667	0.976744	0	0	0	0	0	2	0	0	0	0	0	0	0	0	0	0	23	1
970	1009100957	male	2002	Xidian University	Freshman	Science	No	179	150	Rural	In poor health	0	0	30	7	0	5	19	75	1	1	3	2	2	0	7	7	0.714286	2	1	0	5	3	11	1	1	1	2	1	1	2	0	0	9	40	1
971	1009101458	male	2003	Xidian University	Freshman	Engineering	No	180	190	Urban	In poor health	1	0	120	8	0	7	18	95	2	3	0	2	1	1	8	7	1	0	1	0	6	3	9	1	1	2	2	1	0	1	1	1	10	38	2
972	159100028	female	2001	Xidian University	Sophomore	Engineering	No	162	115	Urban	In good health	0	0	30	7	0	6	20	57.5	1	1	1	1	2	0	7	7	0.857143	0	2	0	6	3	9	3	3	1	1	1	1	1	1	1	13	49	1
973	1009101872	female	2003	Xidian University	Freshman	Engineering	No	151	114	Rural	In good health	23	0	10	8	0	8	18	57	1	0	2	1	0	23	8	9	0.888889	0	1	0	3	2	5	1	1	1	1	0	1	1	0	0	6	35	3
974	49200550	female	2001	Xidian University	Sophomore	Engineering	No	153	86	Rural	In good health	0	0	120	7	30	5	20	43	1	3	3	3	2	0	7.5	7.5	0.666667	2		0	4	2		1	0	3	1	1	0	0	0	0	6	23	1
975	1009101964	male	2003	Xidian University	Freshman	Engineering	No	178	134	Rural	General health condition	23	0	6	7	0	7	18	67	0	0	0	0	1	23	7	8	0.875	0	0	0	1	1	2	1	0	0	1	1	0	1	0	0	4	37	1
976	1009101453	female	2003	Xidian University	Freshman	Engineering	No	176	128	Urban	In good health	23	0	1	7	0	8	18	64	0	0	0	0	0	23	7	8	1	0	0	0	0	0	0	0	0	0	0	0	0	0	0	0	0	36	1
977	1140100007	male	2001	Xidian University	Freshman	Engineering	No	181	133	Urban	In poor health	0	0	5	9	0	8	20	66.5	1	0	1	1	0	0	9	9	0.888889	0	1	0	1	1	4	0	0	0	0	0	0	0	0	0	0	37	1
978	9100942	male	2000	Xidian University	Sophomore	Engineering	No	173	114	Rural	General health condition	23	0	10	7	0	8	21	57	2	0	2	1	0	23	7	8	1	0	2	0	2	1	6	1	1	1	1	1	1	1	1	0	8	44	1
979	49200515	female	2002	Xidian University	Sophomore	Engineering	No	156	94	Urban	General health condition	23	0	15	7	30	8	19	47	1	0	1	1	0	23	7.5	8.5	0.941176	0		0	6	3		0	0	0	1	0	0	0	0	0	1	44	3
980	1009100827	male	2004	Xidian University	Freshman	Engineering	No	177	147	Rural	General health condition	0	0	30	7	0	6.5	17	73.5	1	1	2	2	1	0	7	7	0.928571	0	1	0	4	2	7	1	1	0	1	0	1	1	0	0	5	43	1
981	1009101206	male	2003	Xidian University	Freshman	Engineering	No	180	180	Urban	General health condition	23	30	15	7	0	7	18	90	1	0	2	1	1	23.5	7	7.5	0.933333	0	2	0	4	2	7	2	1	2	1	1	0	1	1	0	9	64	1
982	1009101020	male	2002	Xidian University	Freshman	Engineering	No	180	120	Rural	In good health	0	0	10	7	0	6	19	60	1	0	1	1	2	0	7	7	0.857143	0	1	0	6	3	8	1	1	1	1	1	1	2	0	0	8	42	1
983	159100053	male	2001	Xidian University	Sophomore	Engineering	No	185	153	Urban	In very good health	0	0	5	7	0	7	20	76.5	0	0	0	0	1	0	7	7	1	0	0	0	0	0	1	0	0	0	0	0	0	0	0	0	0	17	3
984	9200225	male	2001	Xidian University	Sophomore	Engineering	No	163	100	Rural	General health condition	0	0	30	7	30	7.5	20	50	2	1	2	2	0	0	7.5	7.5	1	0	1	0	6	3	8	2	1	2	1	1	3	1	1	0	12	50	1
985	1099100024	female	2003	Xidian University	Freshman	Humanities and SocialSciences	No	166	110	Rural	In very good health	22	0	15	6	0	8	18	55	1	0	0	0	0	22	6	8	1	0	1	0	1	1	3	0	0	0	0	0	0	0	0	0	0		1
986	1009101479	male	2003	Xidian University	Freshman	Engineering	No	179	110	Rural	In good health	23	0	20	7	0	8	18	55	0	1	0	1	0	23	7	8	1	0	0	0	2	1	2	0	0	0	0	0	0	1	0	0	1	38	1
987	9101036	male	2002	Xidian University	Sophomore	Engineering	No	176	116	Rural	In good health	0	0	30	8	0	7	19	58	1	1	0	1	1	0	8	8	0.875	0	1	0	3	2	6	1	1	1	1	1	1	1	1	0	8		1
988	2000910900	male	2002	Xidian University	Sophomore	Engineering	No	178	147	Urban	In very good health	1	0	15	8	0	7	19	73.5	2	0	3	2	1	1	8	7	1	0	1	0	5	3	9	0	0	2	1	1	0	3	1	0	8	35	3
989	1009101333	male	2003	Xidian University	Freshman	Engineering	No	182	160	Urban	General health condition	23	0	10	7	0	7	18	80	0	0	0	0	1	23	7	8	0.875	0	0	0	0	0	1	1	1	0	1	0	0	0	0	0	3	39	1
990	1008101477	male	2004	Xidian University	Freshman	Engineering	No	173	135	Rural	In good health	0	15	5	7	15	7	17	67.5	0	0	0	0	1	0.25	7.25	7	1	0	0	0	4	2	3	0	0	0	0	0	0	0	0	0	0	52	1
991	9101252	male	2002	Xidian University	Sophomore	Engineering	No	160	120	Rural	General health condition	23	0	30	7	30	8	19	60	1	1	1	1	0	23	7.5	8.5	0.941176	0	1	0	4	2	5	1	0	0	0	0	0	0	0	0	1	35	1
992	1099100083	female	2003	Xidian University	Freshman	Humanities and SocialSciences	No	156	108	Rural	In poor health	1	0	20	8	0	7	18	54	1	1	0	1	1	1	8	7	1	0	1	0	0	0	4	0	0	0	0	0	0	0	0	0	0	20	1
993	9101076	female	2002	Xidian University	Sophomore	Engineering	No	170	105	Rural	In good health	0	0	30	7	30	6.5	19	52.5	2	1	2	2	1	0	7.5	7.5	0.866667	0	1	0	6	3	9	1	1	1	1	1	0	1	0	0	6	60	1
994	100910165	female	2003	Xidian University	Freshman	Engineering	No	163	100	Urban	General health condition	0	0	30	8	0	7.5	18	50	2	1	3	2	0	0	8	8	0.9375	0	1	0	3	2	7	0	1	1	1	1	0	0	0	0	4	32	3
995	1009101457	male	2003	Xidian University	Freshman	Engineering	No	171	126	Rural	General health condition	22	0	30	7	50	8	18	63	0	1	1	1	0	22	7.83333	9.83333	0.813559	1	1	0	2	1	4	1	1	2	0	1	1	1	0	0	7	40	1
996	1009101402	female	2002	Xidian University	Freshman	Engineering	No	171	114	Urban	In very good health	23	0	10	6	0	6	19	57	0	0	1	1	2	23	6	7	0.857143	0	1	0	0	0	4	0	0	0	0	0	0	0	0	0	0	31	1
997	1099100035	female	2003	Xidian University	Freshman	Humanities and SocialSciences	No	158	108	Rural	General health condition	23	0	10	6	30	7	18	54	1	0	1	1	1	23	6.5	7.5	0.933333	0	1	0	0	0	4	0	0	0	0	0	0	0	0	0	0	17	1
998	1099100002	male	2002	Xidian University	Freshman	Humanities and SocialSciences	No	179	150	Urban	General health condition	0	0	10	7	0	6	19	75	1	0	1	1	2	0	7	7	0.857143	0	1	0	1	1	6	1	1	0	0	0	1	1	0	0	4	48	2
999	1009101944	male	2003	Xidian University	Freshman	Engineering	No	171	125	Urban	In good health	0	0	10	7	0	6	18	62.5	2	0	2	1	2	0	7	7	0.857143	0	1	0	6	3	9	0	0	1	1	1	0	0	0	0	3	50	1
1000	1009101663	male	2003	Xidian University	Freshman	Humanities and SocialSciences	No	183	180	Urban	General health condition	0	0	30	7	0	6	18	90	1	1	1	1	2	0	7	7	0.857143	0	1	0	2	1	6	1	1	1	1	1	1	1	1	1	9	34	1
1001	1009101669	female	2003	Xidian University	Freshman	Engineering	No	155	90	Rural	In good health	0	0	12	7	0	7	18	45	1	0	0	0	1	0	7	7	1	0	1	0	3	2	5	1	1	1	1	1	1	1	1	1	9	38	1
1002	9101305	male	2002	Xidian University	Sophomore	Science	No	175	120	Urban	In good health	0	0	30	8	0	6	19	60	2	1	3	2	2	0	8	8	0.75	1	1	0	5	3	11	1	2	1	3	2	2	2	0	0	13	42	2
1003	9100655	male	2001	Xidian University	Sophomore	Engineering	No	181	148	Urban	In good health	23	0	30	7	0	7	20	74	0	1	0	1	1	23	7	8	0.875	0	1	0	4	2	5	1	0	3	1	0	1	1	0	0	7	31	3
1004	1099100031	female	2003	Xidian University	Freshman	Humanities and SocialSciences	No	176	110	Urban	General health condition	23	0	30	8	0	8	18	55	0	1	0	1	0	23	8	9	0.888889	0	1	0	1	1	3	1	1	1	1	0	1	0	0	0	5	32	1
1005	1009101223	male	2003	Xidian University	Freshman	Engineering	No	174	118	Rural	General health condition	23	0	120	7	0	6	18	59	3	3	0	2	2	23	7	8	0.75	1	1	0	3	2	11	1	1	2	2	0	1	1	0	1	9	47	1
1006	1009101160	male	2001	Xidian University	Freshman	Engineering	No	170	110	Urban	General health condition	23	0	80	7	0	6	20	55	2	3	3	3	2	23	7	8	0.75	1	1	0	6	3	12	1	1	2	1	1	1	1	1	0	9	35	3
1007	1009102315	male	2002	Xidian University	Freshman	Science	No	168	112	Rural	In very good health	23	0	5	6	0	5	19	56	0	0	0	0	2	23	6	7	0.714286	2	1	0	1	1	6	0	0	0	0	0	0	0	0	0	0	24	1
1008	1009100981	male	2003	Xidian University	Freshman	Engineering	No	182	139	Rural	General health condition	0	0		7	0	6	18	69.5	1		1		2	0	7	7	0.857143	0	0	0	2	1		1	0	0	0	0	0	0	0	0	1	24	1
1009	1009101023	female	2003	Xidian University	Freshman	Engineering	No	172	140	Urban	General health condition	23	0	20	7	0	8	18	70	0	1	0	1	0	23	7	8	1	0	0	0	0	0	1	0	0	0	0	0	0	0	0	0	0	17	1
1010	1009101235	male	2003	Xidian University	Freshman	Engineering	No	183	210	Urban	In poor health	23	30	10	7	30	8	18	105	1	0	0	0	0	23.5	7.5	8	1	0	1	0	4	2	4	0	0	0	1	1	0	1	0	0	3	40	3
1011	1079100009	female	2003	Xidian University	Freshman	Science	No	150	110	Rural	General health condition	23	0	20	7	0	8	18	55	2	1	1	1	0	23	7	8	1	0	1	0	6	3	7	0	2	1	3	3	3	0	0	0	12	56	1
1012	1009001909	female	2003	Xidian University	Freshman	Engineering	No	175	165	Rural	In good health	0	0	20	7	30	8	18	82.5	1	1	1	1	0	0	7.5	7.5	1.06667	0	1	0	2	1	4	0	0	0	1	0	0	1	0	0	2	28	1
1013	1009101361	female	2003	Xidian University	Freshman	Engineering	No	165	136	Rural	In very good health	23	0	5	7	0	8	18	68	0	0	0	0	0	23	7	8	1	0	1	0	2	1	2	0	0	0	0	0	0	0	0	0	0	26	1
1014	1009101927	male	2003	Xidian University	Freshman	Engineering	No	182	137	Urban	In good health	23	0	10	7	0	8	18	68.5	1	0	1	1	0	23	7	8	1	0	1	0	4	2	5	1	1	1	1	1	1	1	0	0	7	35	1
1015	1009101408	male	2003	Xidian University	Freshman	Engineering	No	187	160	Urban	General health condition	22	0	20	7	0	8	18	80	0	1	0	1	0	22	7	9	0.888889	0	0	0	0	0	1	0	0	0	0	0	0	0	0	0	0	17	3
1016	1009101913	male	2003	Xidian University	Freshman	Engineering	No	178	150	Rural	General health condition	0	0	10	7	0	7	18	75	1	0	0	0	1	0	7	7	1	0	1	0	3	2	5	1	1	0	1	1	1	1	1	1	8	27	1
1017	1009100934	male	2003	Xidian University	Freshman	Engineering	No	180	110	Rural	General health condition	0	0	10	7	0	7	18	55	1	0	0	0	1	0	7	7	1	0	1	0	0	0	3	0	0	0	0	0	0	0	0	0	0	26	1
1018	1009101093	male	2003	Xidian University	Freshman	Science	No	179	179	Urban	In good health	0	0	5	6	0	5	18	89.5	1	0	1	1	2	0	6	6	0.833333	1	1	1	2	1	8	0	0	1	0	1	0	1	0	0	3	23	3
1019	1009100520	male	2003	Xidian University	Freshman	Engineering	No	178	144	Urban	In good health	23	0	20	7	0	8	18	72	1	1	0	1	0	23	7	8	1	0	1	0	0	0	3	0	0	0	0	0	0	0	0	0	0	17	3
1020	1009101236	male	2003	Xidian University	Freshman	Engineering	No	173	176	Rural	In very poor health	22	30	40	7	0	8	18	88	0	2	3	3	0	22.5	7	8.5	0.941176	0		0	2	1		0	0	0	1	0	0	2	0	0	3		2
1021	1009101252	male	2004	Xidian University	Freshman	Science	No	170	100	Urban	General health condition	0	0	30	7	0	7	17	50	1	1	2	2	1	0	7	7	1	0	1	0	5	3	8	1	1	1	1	1	1	1	1	0	8	32	1
1022	1049200534	male	2003	Xidian University	Freshman	Engineering	No	166	106	Urban	In good health	23	0	20	7	0	8	18	53	1	1	2	2	0	23	7	8	1	0	1	0	1	1	5	1	0	1	0	0	0	0	0	0	2	36	1
1023	1009100779	male	2004	Xidian University	Freshman	Engineering	No	178	156	Rural	General health condition	23	0	3	7	0	7	17	78	1	0	0	0	1	23	7	8	0.875	0	1	0	3	2	5	1	0	0	1	1	0	1	0	0	4	35	1
1024	1009101036	male	2003	Xidian University	Freshman	Engineering	No	189	200	Urban	In good health	0	0	0	7	0	6	18	100	2	0	0	0	2	0	7	7	0.857143	0	1	0	1	1	6	0	1	0	1	0	0	1	0	0	3	33	3
1025	1049200435	male	2002	Xidian University	Freshman	Science	No	176	130	Urban	In very good health	23	0	60	7	0	7	19	65	1	2	3	3	1	23	7	8	0.875	0	1	0	2	1	7	0	0	1	1	1	0	0	0	0	3	20	1
1026	1009100985	male	2002	Xidian University	Freshman	Engineering	No	170	105	Rural	General health condition	23	0	10	6	30	6.5	19	52.5	1	0	0	0	1	23	6.5	7.5	0.866667	0	1	0	0	0	3	0	0	0	0	0	0	0	0	0	0	24	1
1027	1049200318	male	2004	Xidian University	Freshman	Engineering	No	168	116	Rural	In poor health	0	0	15	8	0	8	17	58	0	0	0	0	0	0	8	8	1	0	1	0	2	1	2	1	1	0	1	0	1	0	0	0	4	25	1
1028	1009101248	male	2003	Xidian University	Freshman	Science	No	170	120	Urban	In good health	1	0	15	7	0	5.5	18	60	0	0	0	0	2	1	7	6	0.916667	0	0	0	2	1	3	0	0	0	0	1	0	0	0	0	1		3
1029	1009100885	male	2003	Xidian University	Freshman	Engineering	No	186	120	Rural	General health condition	23	0	0	7	0	7	18	60	1	0	0	0	1	23	7	8	0.875	0	1	0	0	0	3	0	1	0	2	1	1	0	0	0	5	49	2
1030	1049200513	male	2003	Xidian University	Freshman	Engineering	No	176	156	Rural	In good health	0	0	5	7	0	7	18	78	0	0	0	0	1	0	7	7	1	0	0	0	0	0	1	0	0	0	0	0	1	0	1	0	2	22	1
1031	1009100669	male	2002	Xidian University	Freshman	Engineering	No	180	165	Urban	In good health	23	0	20	7	30	7.5	19	82.5	1	1	0	1	0	23	7.5	8.5	0.882353	0	1	0	5	3	6	1	1	1	2	1	0	1	1	0	8	44	3
1032	2100901011	male	2002	Xidian University	Freshman	Engineering	No	168	120	Rural	In very good health	0	0	3	6	0	6	19	60	0	0	0	0	2	0	6	6	1	0	0	0	2	1	3	0	0	0	0	0	0	1	0	0	1	21	1
1033	1049200289	male	2003	Xidian University	Freshman	Engineering	No	172	126	Rural	General health condition	1	0	10	7	0	7	18	63	1	0	1	1	1	1	7	6	1.16667	0	1	0	4	2	6	1	1	0	1	1	2	2	1	0	9	49	1
1034	1009200803	male	2003	Xidian University	Freshman	Engineering	No	166	115	Urban	In good health	23	30	5	7	15	7.75	18	57.5	1	0	1	1	0	23.5	7.25	7.75	1	0	1	0	3	2	5	1	1	0	0	0	1	0	0	0	3	28	2
1035	1009101059	male	2003	Xidian University	Freshman	Engineering	No	174	128	Rural	General health condition	0	0	5	7	30	7.5	18	64	1	0	0	0	0	0	7.5	7.5	1	0	1	0	2	1	3	0	0	0	0	0	0	0	0	0	0	41	1
1036	1009101263	male	2003	Xidian University	Freshman	Engineering	No	175	140	Rural	In good health	19	0	20	7	0	7	18	70	0	1	0	1	1	19	7	12	0.583333	3	0	1	4	2	8	1	0	0	1	1	0	0	0	0	3	30	1
1037	1009101195	male	2003	Xidian University	Freshman	Engineering	No	175	120	Urban	In good health	0	0	5	7	0	7	18	60	1	0	2	1	1	0	7	7	1	0	1	0	4	2	6	0	0	0	0	0	0	0	0	0	0	22	3
1038	1009100852	male	2003	Xidian University	Freshman	Engineering	No	167	120	Urban	General health condition	0	0	5	7	0	7	18	60	1	0	1	1	1	0	7	7	1	0		0	2	1		1	1	0	1	0	0	1	0	0	4	20	1
*1	42002276	female	2002	Shaanxi Normal University	Sophomore	Humanities and SocialSciences	No	166	104	Urban	In poor health	23	0	10	7	0	7	19	52	1	0	0	0	1	23	7	8	0.875	0	1	2	4	2	7	1	1	0	1	1	1	1	1	0	7	33	1
*2		female	2002	Shaanxi Normal University	Sophomore	Humanities and SocialSciences	No	164	116	Urban	General health condition	1	0	15	7	0	6	19	58	1	0	1	1	2	1	7	6	1	0	1	0	5	3	8	1	1	0	1	1	1	1	0	1	7	59	2
*3	42032103	female	2002	Shaanxi Normal University	Sophomore	Humanities and SocialSciences	No	163	102	Urban	General health condition	22	0	30	7	0	9	19	51	2	1	0	1	0	22	7	9	1	0	1	2	5	3	9	1	0	0	0	0	1	0	0	0	2	17	3
*4	42002091	female	2001	Shaanxi Normal University	Sophomore	Humanities and SocialSciences	No	166	100	Rural	General health condition	23	0	30	6	50	6.5	20	50	1	1	2	2	1	23	6.83333	7.83333	0.829787	1	0															34	1
*5	42002073	female	2002	Shaanxi Normal University	Sophomore	Humanities and SocialSciences	No	163	120	Urban	In good health	23	30	15	7	0	7	19	60	1	0	2	1	1	23.5	7	7.5	0.933333	0	1	0	6	3	7	1	1	1	1	2	0	0	0	0	6	42	3
*6	42002178	female	2001	Shaanxi Normal University	Sophomore	Humanities and SocialSciences	No	160	90	Rural	General health condition	0	0	15	7	0	6	20	45	0	0	0	0	2	0	7	7	0.857143	0	1	0	3	2	5	0	1	2	1	2	2	2	0	0	10	50	1
